# Supplementary material
Source: publisher figshare collection journal article supplement (https://acs.figshare.com/ndownloader/files/27365287)
Supplement: Supplementary file 1 [file 27365287]

## Sheet: Table of Contents
Tab Name	Description	Related to
21-SLF_peptide	All quantified peptides with their TMT intensities	Figure S9
10 µM 21-SLF site engagement	Average engagement% and R value from 10 µM 21-SLF-treated HEK293T cells

## Sheet: 21-SLF_peptide
LOCUS	SPEC_COUNT	SEQ_COUNT	LENGTH	pI	total m/z_126.127725	norm_total m/z_126.127725	norm_median m/z_126.127725	DESCRIPTION
UNIQUE	SEQUENCE	m/z_126.127725_int	m/z_127.12476_int	m/z_128.134433_int	m/z_129.131468_int	m/z_130.141141_int	m/z_131.138176_int
Q15370	11	0.636	13133	11	8668	7812.3	66725	TCEB2 Transcription elongation factor B polypeptide 2 [REVIEWED] ENSG00000103363;IPI00026670;Q15370
U	R.LYKDDQLLDDGKTLGEC(398.2529)GFTSQTARPQAPATVGLAFR.A	18676	17193	18792	18256	18657	16247
U	R.LYKDDQLLDDGKTLGEC(398.2529)GFTSQTARPQAPATVGLAFR.A	13106	10725	11746	14235	15698	10849
U	R.LYKDDQLLDDGKTLGEC(398.2529)GFTSQTARPQAPATVGLAFR.A	16826	17621	15895	17800	14493	15380
U	K.TLGEC(398.2529)GFTSQTARPQAPATVGLAFR.A	2292	1288	3222	1064	1676	0
U	K.TLGEC(398.2529)GFTSQTARPQAPATVGLAFR.A	7251	8117	7314	8468	8032	7370
U	R.ADDTFEALC(398.2529)IEPFSSPPELPDVMKPQDSGSSANEQAVQ.-	0	0	1646	0	0	0
U	R.ADDTFEALC(398.2529)IEPFSSPPELPDVM(15.994915)KPQDSGSSANEQAVQ.-	10242	10827	12204	9228	8541	10536
U	R.ADDTFEALC(398.2529)IEPFSSPPELPDVM(15.994915)KPQDSGSSANEQAVQ.-	0	1362	0	0	0	0
U	R.ADDTFEALC(398.2529)IEPFSSPPELPDVM(15.994915)KPQDSGSSANEQAVQ.-	6662	4382	5173	4166	2821	4099
U	R.ADDTFEALC(398.2529)IEPFSSPPELPDVM(15.994915)KPQDSGSSANEQAVQ.-	3068	1625	2152	3627	2899	3524
P10599	232	0.59	11737	232	107883	97236.9	15418475	TXN Thioredoxin [REVIEWED] ENSG00000136810;IPI00216298;P10599;Q53X69;Q96KI3;Q9UDG5
U	K.TAFQEALDAAGDKLVVVDFSATWC(398.2529)GPCK.M	0	0	0	1579	1399	1536
U	K.TAFQEALDAAGDKLVVVDFSATWC(398.2529)GPCK.M	17060	15556	16537	17672	18453	16650
U	K.TAFQEALDAAGDKLVVVDFSATWC(398.2529)GPCK.M	4019	4946	4891	6200	3129	4378
U	K.TAFQEALDAAGDKLVVVDFSATWC(398.2529)GPCK.M	0	0	0	0	1349	1308
U	K.TAFQEALDAAGDKLVVVDFSATWC(398.2529)GPCK.M	9113	8623	10828	11152	10015	10860
U	K.TAFQEALDAAGDKLVVVDFSATWC(398.2529)GPCK.M	2966	3245	3903	3164	3864	3953
U	K.TAFQEALDAAGDKLVVVDFSATWC(398.2529)GPCK.M	0	0	0	0	2075	0
U	K.TAFQEALDAAGDKLVVVDFSATWC(398.2529)GPCK.M	0	1296	0	1316	0	0
U	K.TAFQEALDAAGDKLVVVDFSATWC(398.2529)GPCK.M	14778	14808	15913	12863	13992	12364
U	K.TAFQEALDAAGDKLVVVDFSATWC(398.2529)GPCK.M	36751	34850	35211	30515	33551	33441
U	K.TAFQEALDAAGDKLVVVDFSATWC(398.2529)GPCK.M	6618	7552	6246	8718	7557	6863
U	K.TAFQEALDAAGDKLVVVDFSATWC(398.2529)GPCK.M	7215	4893	6030	4475	4491	3124
U	K.TAFQEALDAAGDKLVVVDFSATWC(398.2529)GPCK.M	3105	4636	3949	4540	4127	3620
U	K.TAFQEALDAAGDKLVVVDFSATWC(398.2529)GPCK.M	8080	8925	9647	7725	7624	8745
U	K.TAFQEALDAAGDKLVVVDFSATWC(398.2529)GPCK.M	1916253	1752565	1914814	1902792	1695316	2016414
U	K.TAFQEALDAAGDKLVVVDFSATWC(398.2529)GPCK.M	82818	68844	85847	78830	74741	83068
U	K.TAFQEALDAAGDKLVVVDFSATWC(398.2529)GPCK.M	48041	47322	50536	49239	53406	55583
U	K.TAFQEALDAAGDKLVVVDFSATWC(398.2529)GPCK.M	6921	5206	5636	7474	5159	5323
U	K.TAFQEALDAAGDKLVVVDFSATWC(398.2529)GPCK.M	4288	3832	3971	5107	4435	3556
U	K.TAFQEALDAAGDKLVVVDFSATWC(398.2529)GPCK.M	1061	0	0	0	0	0
U	K.TAFQEALDAAGDKLVVVDFSATWC(398.2529)GPCK.M	3289	3990	2711	3745	4659	4661
U	K.TAFQEALDAAGDKLVVVDFSATWC(398.2529)GPCK.M	1342	0	1982	2118	1695	1458
U	K.TAFQEALDAAGDKLVVVDFSATWC(398.2529)GPCK.M	1251486	1193749	1258415	1179929	1147559	1111350
U	K.TAFQEALDAAGDKLVVVDFSATWC(398.2529)GPCK.M	1697397	1616956	1731430	1707023	1738942	1589809
U	K.TAFQEALDAAGDKLVVVDFSATWC(398.2529)GPCK.M	7375	7837	7316	9013	6725	9144
U	K.TAFQEALDAAGDKLVVVDFSATWC(398.2529)GPCK.M	11453	10616	12512	13424	12076	13020
U	K.TAFQEALDAAGDKLVVVDFSATWC(398.2529)GPCK.M	2892	4293	1797	2244	4356	3165
U	K.TAFQEALDAAGDKLVVVDFSATWC(398.2529)GPCK.M	2903	4041	2642	2986	3618	3493
U	K.TAFQEALDAAGDKLVVVDFSATWC(398.2529)GPCK.M	4792	3732	2395	4321	3026	2259
U	K.TAFQEALDAAGDKLVVVDFSATWC(398.2529)GPCK.M	1082	0	0	0	0	0
U	K.TAFQEALDAAGDKLVVVDFSATWC(398.2529)GPCK.M	0	0	1400	0	0	0
U	K.TAFQEALDAAGDKLVVVDFSATWC(398.2529)GPCK.M	0	0	0	1283	0	0
U	K.TAFQEALDAAGDKLVVVDFSATWC(398.2529)GPCK.M	0	0	1526	0	0	0
U	K.TAFQEALDAAGDKLVVVDFSATWC(398.2529)GPCK.M	4082	3149	5372	3549	3044	3061
U	K.TAFQEALDAAGDKLVVVDFSATWC(398.2529)GPCK.M	13243	9878	13596	11343	13959	13058
U	K.TAFQEALDAAGDKLVVVDFSATWC(398.2529)GPCK.M	2563	2439	1945	1600	1354	2215
U	K.TAFQEALDAAGDKLVVVDFSATWC(398.2529)GPCK.M	23800	22008	26197	28637	22773	20772
U	K.TAFQEALDAAGDKLVVVDFSATWC(398.2529)GPCK.M	7878	8327	7600	9217	6184	7659
U	K.TAFQEALDAAGDKLVVVDFSATWC(398.2529)GPCK.M	0	1527	0	997	1290	0
U	K.TAFQEALDAAGDKLVVVDFSATWC(398.2529)GPCK.M	0	0	0	0	0	1291
U	K.TAFQEALDAAGDKLVVVDFSATWC(398.2529)GPCK.M	0	0	0	1349	0	0
U	K.TAFQEALDAAGDKLVVVDFSATWC(398.2529)GPCK.M	41288	36483	42733	39501	35078	39061
U	K.TAFQEALDAAGDKLVVVDFSATWC(398.2529)GPCK.M	1436	1497	0	0	0	1387
U	K.TAFQEALDAAGDKLVVVDFSATWC(398.2529)GPCK.M	1735	1062	1545	1259	1758	0
U	K.TAFQEALDAAGDKLVVVDFSATWC(398.2529)GPCK.M	0	1649	0	1388	0	1479
U	K.TAFQEALDAAGDKLVVVDFSATWC(398.2529)GPCK.M	33536	35208	33236	31812	29775	30557
U	K.TAFQEALDAAGDKLVVVDFSATWC(398.2529)GPCK.M	4992	2185	5089	4095	4157	2849
U	K.TAFQEALDAAGDKLVVVDFSATWC(398.2529)GPCK.M	12582	13152	15169	13281	14468	12026
U	K.TAFQEALDAAGDKLVVVDFSATWC(398.2529)GPCK.M	13908	13427	13165	13372	12350	12879
U	K.TAFQEALDAAGDKLVVVDFSATWC(398.2529)GPCK.M	2819	1679	1645	1125	2958	1395
U	K.TAFQEALDAAGDKLVVVDFSATWC(398.2529)GPCK.M	220185	209886	205538	198467	197121	195387
U	K.TAFQEALDAAGDKLVVVDFSATWC(398.2529)GPCK.M	6310	7455	6539	5738	6067	5574
U	K.TAFQEALDAAGDKLVVVDFSATWC(398.2529)GPCK.M	2898	3399	3290	2740	3321	1980
U	K.TAFQEALDAAGDKLVVVDFSATWC(398.2529)GPCK.M	11052	10370	9299	10903	10329	10051
U	K.TAFQEALDAAGDKLVVVDFSATWC(398.2529)GPCK.M	10371	12001	11868	10723	15627	11550
U	K.TAFQEALDAAGDKLVVVDFSATWC(398.2529)GPC(398.2529)K.M	14792	15545	21988	12500	14713	16917
U	K.TAFQEALDAAGDKLVVVDFSATWC(398.2529)GPC(398.2529)K.M	36055	33784	38157	23821	30145	36300
U	K.TAFQEALDAAGDKLVVVDFSATWC(398.2529)GPC(398.2529)K.M	41337	40719	48538	29797	39298	47081
U	K.TAFQEALDAAGDKLVVVDFSATWC(398.2529)GPC(398.2529)K.M	2243	1727	1606	1625	1519	2310
U	K.TAFQEALDAAGDKLVVVDFSATWC(398.2529)GPC(398.2529)K.M	20379	17616	20764	12181	16318	19129
U	K.TAFQEALDAAGDKLVVVDFSATWC(398.2529)GPC(398.2529)K.M	21930	23716	26444	13315	22348	22452
U	A.FQEALDAAGDKLVVVDFSATWC(398.2529)GPCK.M	63381	56663	59312	48742	47248	45768
U	A.FQEALDAAGDKLVVVDFSATWC(398.2529)GPCK.M	31950	32614	32051	30934	33339	33914
U	D.KLVVVDFSATWC(398.2529)GPCK.M	3883	3682	2162	3618	3910	3423
U	K.LVVVDFSATWC(398.2529)GPCK.M	7716	6718	6492	7594	7411	8449
U	K.LVVVDFSATWC(398.2529)GPCK.M	2415	1714	5146	3207	3205	4024
U	K.LVVVDFSATWC(398.2529)GPCK.M	77675	76289	72037	66156	60535	64813
U	K.LVVVDFSATWC(398.2529)GPCK.M	676933	643261	698844	623045	590897	632051
U	K.LVVVDFSATWC(398.2529)GPCK.M	30357	30768	37511	26593	27100	30964
U	K.LVVVDFSATWC(398.2529)GPCK.M	195423	181378	177511	151419	159513	161418
U	K.LVVVDFSATWC(398.2529)GPCK.M	1851	0	2359	0	1793	2807
U	K.LVVVDFSATWC(398.2529)GPCK.M	402998	435330	444371	399263	398399	401557
U	K.LVVVDFSATWC(398.2529)GPCK.M	61162	62343	57269	56823	51178	60215
U	K.LVVVDFSATWC(398.2529)GPCK.M	10923	9109	9617	8976	7142	8171
U	K.LVVVDFSATWC(398.2529)GPCK.M	11371	12240	10915	13258	9389	11993
U	K.YSNVIFLEVDVDDCQDVASEC(398.2529)EVK.C	3853	2830	2662	1944	2853	2531
U	K.YSNVIFLEVDVDDCQDVASEC(398.2529)EVK.C	32463	32246	31072	29772	30301	28679
U	K.YSNVIFLEVDVDDC(398.2529)QDVASECEVK.C	1711	1422	1787	1174	1841	0
U	K.YSNVIFLEVDVDDC(398.2529)QDVASECEVK.C	0	0	0	0	0	1584
U	K.YSNVIFLEVDVDDC(398.2529)QDVASECEVK.C	28736	28567	30580	26177	28300	27578
U	K.YSNVIFLEVDVDDC(398.2529)QDVASECEVK.C	12773	11331	10257	10056	8467	10621
U	K.YSNVIFLEVDVDDC(398.2529)QDVASECEVK.C	4145	2526	2581	2404	2647	1846
U	K.C(398.2529)MPTFQFFK.K	819690	779998	868578	759027	875139	813510
U	K.C(398.2529)MPTFQFFK.K	586074	583542	728191	567176	688211	669279
U	K.C(398.2529)MPTFQFFK.K	114649	124045	142253	121040	137822	135857
U	K.C(398.2529)MPTFQFFK.K	23492	26993	30472	24231	31909	30216
U	K.C(398.2529)MPTFQFFK.K	5380	7396	7345	5863	5762	5366
U	K.C(398.2529)MPTFQFFK.K	0	0	1799	0	0	0
U	K.C(398.2529)MPTFQFFK.K	0	3257	0	1836	2957	2376
U	K.C(398.2529)MPTFQFFK.K	18462	18986	21241	16376	20492	19210
U	K.C(398.2529)MPTFQFFK.K	65843	62318	70165	58729	76534	65279
U	K.C(398.2529)MPTFQFFK.K	64936	56596	66533	57999	69182	70610
U	K.C(398.2529)MPTFQFFK.K	21484	22953	27385	18473	25764	21607
U	K.C(398.2529)MPTFQFFK.K	16082	14355	17770	16147	16821	16768
U	K.C(398.2529)MPTFQFFK.K	21607	19225	23122	20205	22257	19264
U	K.C(398.2529)MPTFQFFK.K	27999	35813	34301	18784	59452	29317
U	K.C(398.2529)MPTFQFFK.K	15284	17217	17137	10591	44581	19420
U	K.C(398.2529)MPTFQFFK.K	6831	4721	8370	6268	5279	6722
U	K.C(398.2529)M(15.994915)PTFQFFK.K	0	0	1452	0	0	0
U	K.C(398.2529)M(15.994915)PTFQFFK.K	0	0	0	0	0	1265
U	K.C(398.2529)M(15.994915)PTFQFFK.K	75016	86990	73431	83685	85382	80056
U	K.C(398.2529)M(15.994915)PTFQFFK.K	34453	30748	34206	37275	35086	32476
U	K.C(398.2529)M(15.994915)PTFQFFK.K	340340	335116	381432	298280	349976	314497
U	K.C(398.2529)M(15.994915)PTFQFFK.K	389413	369759	417804	358355	443770	419968
U	K.C(398.2529)M(15.994915)PTFQFFK.K	435589	443891	476907	392334	457587	452113
U	K.C(398.2529)M(15.994915)PTFQFFK.K	489887	481229	521411	484699	555982	541326
U	K.C(398.2529)M(15.994915)PTFQFFK.K	121941	117508	114251	116914	134415	125877
U	K.C(398.2529)M(15.994915)PTFQFFK.K	23720	20996	25891	18785	29481	25070
U	K.C(398.2529)M(15.994915)PTFQFFK.K	3537	2707	4642	4142	5083	3923
U	K.C(398.2529)M(15.994915)PTFQFFK.K	6136	8029	4421	5679	6307	5336
U	K.C(398.2529)M(15.994915)PTFQFFK.K	9957	11309	8668	10325	9803	10656
U	K.C(398.2529)M(15.994915)PTFQFFK.K	3324	7222	5142	6836	5827	4259
U	K.C(398.2529)M(15.994915)PTFQFFK.K	9802	8041	8928	8377	9800	9233
U	K.C(398.2529)M(15.994915)PTFQFFK.K	7100	3666	7467	4596	6849	6923
U	K.C(398.2529)M(15.994915)PTFQFFK.K	0	1349	1406	0	0	0
U	K.C(398.2529)M(15.994915)PTFQFFK.K	1244	0	0	0	0	0
U	K.C(398.2529)M(15.994915)PTFQFFK.K	1963	2167	1223	1033	0	1500
U	K.C(398.2529)M(15.994915)PTFQFFK.K	4100	5668	5519	4209	5390	6475
U	K.C(398.2529)M(15.994915)PTFQFFK.K	2001	0	2460	0	1590	2675
U	K.C(398.2529)M(15.994915)PTFQFFK.K	0	0	0	1331	0	0
U	K.C(398.2529)M(15.994915)PTFQFFK.K	0	0	0	0	1464	0
U	K.C(398.2529)M(15.994915)PTFQFFK.K	0	0	0	1163	0	0
U	K.C(398.2529)M(15.994915)PTFQFFK.K	1041	0	1596	0	2266	0
U	K.C(398.2529)M(15.994915)PTFQFFK.K	1279	0	2504	0	0	0
U	K.C(398.2529)M(15.994915)PTFQFFK.K	0	0	0	1367	1945	1691
U	K.C(398.2529)M(15.994915)PTFQFFK.K	0	0	0	0	1769	0
U	K.C(398.2529)M(15.994915)PTFQFFK.K	0	0	1593	2284	1874	2513
U	K.C(398.2529)M(15.994915)PTFQFFK.K	5936	6593	6595	7891	6028	6650
U	K.C(398.2529)M(15.994915)PTFQFFK.K	5407	5739	7881	7016	7322	7539
U	K.C(398.2529)M(15.994915)PTFQFFK.K	3707	3073	3340	2689	1695	0
U	K.C(398.2529)M(15.994915)PTFQFFK.K	0	0	1848	0	0	0
U	K.C(398.2529)M(15.994915)PTFQFFK.K	2323	2818	2129	2076	4038	1496
U	K.C(398.2529)M(15.994915)PTFQFFK.K	4964	5191	5652	4160	2718	2735
U	K.C(398.2529)M(15.994915)PTFQFFK.K	2854	5818	1634	4251	6291	4022
U	K.C(398.2529)M(15.994915)PTFQFFK.K	2795	1559	2033	1550	2238	3429
U	K.C(398.2529)M(15.994915)PTFQFFK.K	1470	1239	0	1778	1170	0
U	K.C(398.2529)M(15.994915)PTFQFFK.K	9566	9943	10824	11099	13220	10447
U	K.C(398.2529)M(15.994915)PTFQFFK.K	9069	10288	8505	9012	8489	7824
U	K.C(398.2529)M(15.994915)PTFQFFK.K	14846	14192	19259	14076	17397	17101
U	K.C(398.2529)M(15.994915)PTFQFFK.K	2137	2229	3903	1977	2835	2218
U	K.C(398.2529)M(15.994915)PTFQFFK.K	0	0	0	1181	2005	2248
U	K.C(398.2529)M(15.994915)PTFQFFK.K	5982	5901	3984	6930	7562	9734
U	K.C(398.2529)M(15.994915)PTFQFFK.K	344976	391786	315866	363200	369642	389307
U	K.C(398.2529)M(15.994915)PTFQFFK.K	352079	386254	370476	354049	399532	396971
U	K.C(398.2529)M(15.994915)PTFQFFK.K	1240394	1276214	1480770	1298370	1545340	1560943
U	K.C(398.2529)M(15.994915)PTFQFFK.K	59389	57229	63610	59246	63911	64730
U	K.C(398.2529)M(15.994915)PTFQFFK.K	29569	33792	36199	35731	36808	32985
U	K.C(398.2529)M(15.994915)PTFQFFK.K	18146	31026	17503	17117	71565	29695
U	K.C(398.2529)M(15.994915)PTFQFFK.K	37092	48370	37129	36502	92107	49420
U	K.C(398.2529)M(15.994915)PTFQFFK.K	44567	55573	53899	50118	51952	56053
U	K.C(398.2529)M(15.994915)PTFQFFK.K	13037	15003	18400	13811	18034	14808
U	K.C(398.2529)M(15.994915)PTFQFFK.K	49840	40713	50811	45281	62073	54724
U	K.C(398.2529)M(15.994915)PTFQFFK.K	42647	46335	44789	44207	46721	44791
U	K.C(398.2529)M(15.994915)PTFQFFK.K	49167	47515	49739	51178	51387	53359
U	K.C(398.2529)M(15.994915)PTFQFFK.K	84895	84442	86989	89045	99881	96924
U	K.C(398.2529)M(15.994915)PTFQFFK.K	36550	37595	38490	33659	42959	38857
U	K.C(398.2529)M(15.994915)PTFQFFK.K	34263	39753	40293	33995	38259	34630
U	K.C(398.2529)M(15.994915)PTFQFFK.K	31684	31070	33073	30283	37697	37198
U	K.C(398.2529)M(15.994915)PTFQFFK.K	32846	32576	32881	25845	36481	28312
U	K.C(398.2529)M(15.994915)PTFQFFK.K	10464	10354	9777	8980	9284	12193
U	K.C(398.2529)M(15.994915)PTFQFFK.K	28205	35028	32756	30694	31532	36000
U	K.C(398.2529)M(15.994915)PTFQFFK.K	41046	35705	43292	32975	40530	39344
U	K.C(398.2529)M(15.994915)PTFQFFK.K	53835	47171	47340	42437	53478	49601
U	K.C(398.2529)M(15.994915)PTFQFFK.K	859136	775070	846952	670951	837396	805699
U	K.C(398.2529)M(15.994915)PTFQFFK.K	2441583	2195266	2329213	2179715	2590695	2501333
U	K.C(398.2529)M(15.994915)PTFQFFK.K	48417	48987	51963	45294	52515	47317
U	K.C(398.2529)M(15.994915)PTFQFFK.K	46411	44777	47376	43569	46227	44699
U	K.C(398.2529)M(15.994915)PTFQFFK.K	56665	53010	54455	56691	61300	61353
U	K.C(398.2529)M(15.994915)PTFQFFK.K	20618	23890	20756	17755	27263	21571
U	K.C(398.2529)M(15.994915)PTFQFFK.K	79515	91937	87877	72390	112613	92850
U	K.C(398.2529)M(15.994915)PTFQFFK.K	36122	35392	37182	33484	46972	39800
U	K.C(398.2529)M(15.994915)PTFQFFK.K	6832	6694	7793	4789	7616	5874
U	K.C(398.2529)MPTFQFFKK.G	0	1508	0	0	0	0
U	K.C(398.2529)MPTFQFFKK.G	1669	0	0	0	0	0
U	K.C(398.2529)MPTFQFFKK.G	1739	1617	3165	2154	2136	2558
U	K.C(398.2529)MPTFQFFKK.G	3095	2855	3352	2817	5452	3899
U	K.C(398.2529)MPTFQFFKK.G	1804	0	0	0	1904	2061
U	K.C(398.2529)MPTFQFFKK.G	11345	10549	9005	8599	11629	10299
U	K.C(398.2529)MPTFQFFKK.G	42777	40634	47736	48132	52911	49001
U	K.C(398.2529)M(15.994915)PTFQFFKK.G	3272	4266	3858	3101	4448	4736
P41134	6	0.574	16132	6	26340.7	23740.8	126866	ID1 DNA-binding protein inhibitor ID-1 [REVIEWED] ENSG00000125968;IPI00218515;P41134;A8K537;E1P5L4;O00651;O00652;Q16371;Q16377;Q5TE66;Q5TE67;Q969Z7;Q9H0Z5;Q9H109
U	K.VASGSTATAAAGPSC(398.2529)ALK.A	30745	31387	28348	33430	33147	36031
U	R.C(398.2529)LSEQSVAISR.C	55419	51988	65894	57904	61535	53243
U	R.C(398.2529)AGGAGAR.L	44812	47370	39668	35112	36971	49089
U	R.LPALLDEQQVNVLLYDM(15.994915)NGC(398.2529)YSR.L	2100	0	1381	0	2245	1999
U	R.LPALLDEQQVNVLLYDM(15.994915)NGC(398.2529)YSR.L	9369	8323	9890	8816	9272	8821
U	R.APLSTLNGEISALTAEAACVPADDRILC(398.2529)R.-	0	0	0	0	0	1173
P05386	19	0.57	11514	19	179811	162067	1451108	RPLP1 60S acidic ribosomal protein P1 [REVIEWED] ENSG00000137818;IPI00008527;P05386
U	K.ALANVNIGSLIC(398.2529)NVGAGGPAPAAGAAPAGGPAPSTAAAPAEEK.K	182417	138491	144711	167561	125124	114709
U	K.ALANVNIGSLIC(398.2529)NVGAGGPAPAAGAAPAGGPAPSTAAAPAEEK.K	11144	9903	9061	9869	11466	8085
U	K.ALANVNIGSLIC(398.2529)NVGAGGPAPAAGAAPAGGPAPSTAAAPAEEK.K	0	0	1421	1786	0	0
U	K.ALANVNIGSLIC(398.2529)NVGAGGPAPAAGAAPAGGPAPSTAAAPAEEK.K	0	0	0	1545	0	0
U	K.ALANVNIGSLIC(398.2529)NVGAGGPAPAAGAAPAGGPAPSTAAAPAEEK.K	175382	132765	138180	146255	141378	122098
U	K.ALANVNIGSLIC(398.2529)NVGAGGPAPAAGAAPAGGPAPSTAAAPAEEK.K	51996	42338	39124	47621	40139	36816
U	K.ALANVNIGSLIC(398.2529)NVGAGGPAPAAGAAPAGGPAPSTAAAPAEEK.K	1219411	1007113	950267	1078786	983185	899736
U	K.ALANVNIGSLIC(398.2529)NVGAGGPAPAAGAAPAGGPAPSTAAAPAEEKK.V	45902	41412	37496	44654	36257	30908
U	K.ALANVNIGSLIC(398.2529)NVGAGGPAPAAGAAPAGGPAPSTAAAPAEEKKVEAK.K	5521	5249	4374	5007	5247	4850
U	K.ALANVNIGSLIC(398.2529)NVGAGGPAPAAGAAPAGGPAPSTAAAPAEEKKVEAK.K	111782	86242	96626	114026	104821	89540
U	K.ALANVNIGSLIC(398.2529)NVGAGGPAPAAGAAPAGGPAPSTAAAPAEEKKVEAK.K	135995	121470	115446	131848	120272	110403
	K.KEESEESDDDM(15.994915)GFGLFD.-	5251	5712	6027	1372	2826	7002
O60232	15	0.563	21474	15	45418.3	40935.9	540761	SSSCA1 Sjoegren syndrome/scleroderma autoantigen 1 [REVIEWED] ENSG00000173465;IPI00028412;O60232
U	R.MLGETC(398.2529)ADCGTILLQDK.Q	10557	9166	11093	9525	7805	9801
U	R.M(15.994915)LGETC(398.2529)ADCGTILLQDK.Q	2221	0	2164	2441	2443	2607
U	R.M(15.994915)LGETC(398.2529)ADCGTILLQDK.Q	39775	37823	43664	36261	35694	34269
U	R.M(15.994915)LGETC(398.2529)ADCGTILLQDKQR.K	29931	34799	30947	30376	25800	31315
U	R.M(15.994915)LGETC(398.2529)ADCGTILLQDKQR.K	50322	49258	42301	49299	39059	53433
U	K.IYC(398.2529)VACQELDSDVDKDNPALNAQAALSQAR.E	9716	9334	8936	9675	5550	8107
U	R.EHQLASASELPLGSRPAPQPPVPRPEHC(398.2529)EGAAAGLK.A	14512	18570	17502	24917	24498	18195
U	R.EHQLASASELPLGSRPAPQPPVPRPEHC(398.2529)EGAAAGLK.A	30175	27651	27140	34401	34156	30227
U	R.EHQLASASELPLGSRPAPQPPVPRPEHC(398.2529)EGAAAGLK.A	89754	100632	61432	115073	131407	89061
U	R.PAPQPPVPRPEHC(398.2529)EGAAAGLK.A	74217	69984	71415	64346	68242	66142
U	R.PAPQPPVPRPEHC(398.2529)EGAAAGLK.A	141289	116827	115383	120163	116085	126541
U	K.AAQGPPAPAVPPNTDVM(15.994915)AC(398.2529)TQTALLQK.L	6899	4776	6457	5335	3215	3059
U	K.AAQGPPAPAVPPNTDVM(15.994915)AC(398.2529)TQTALLQK.L	21261	24396	19858	25703	20047	19452
U	K.AAQGPPAPAVPPNTDVM(15.994915)AC(398.2529)TQTALLQK.L	48099	46589	46418	51678	46461	46542
U	K.AAQGPPAPAVPPNTDVM(15.994915)AC(398.2529)TQTALLQK.L	45311	42968	39343	46400	38934	41254
O00244	10	0.559	7402	10	177683	160148	1265527	ATOX1 Copper transport protein ATOX1 [REVIEWED] ENSG00000177556;IPI00010863;O00244;A8KAJ8;D3DQI2;Q2M1R6;Q56AP3
U	M.PKHEFSVDMTC(398.2529)GGCAEAVSR.V	71502	61152	65467	78111	71058	70717
U	M.PKHEFSVDMTC(398.2529)GGCAEAVSR.V	262434	204552	238747	289221	287567	272539
U	M.PKHEFSVDM(15.994915)TC(398.2529)GGCAEAVSR.V	106515	90912	83288	108340	109218	102829
U	M.PKHEFSVDM(15.994915)TC(398.2529)GGCAEAVSR.V	424975	388270	413352	493829	461964	428594
U	M.PKHEFSVDM(15.994915)TC(398.2529)GGCAEAVSR.V	617173	524311	533728	634821	620742	571583
U	M.PKHEFSVDM(15.994915)TC(398.2529)GGCAEAVSR.V	20043	17620	17952	18289	21726	16960
U	K.HEFSVDM(15.994915)TC(398.2529)GGCAEAVSR.V	15940	16140	14807	21038	20288	21498
U	K.HEFSVDM(15.994915)TC(398.2529)GGCAEAVSR.V	9605	10091	11657	12320	8390	11473
U	K.HEFSVDM(15.994915)TC(398.2529)GGCAEAVSR.V	31305	33099	34297	37058	34081	29653
U	K.VC(398.2529)IESEHSM(15.994915)DTLLATLKK.T	41990	41113	32131	43178	39338	36867
P50151	2	0.559	7205	2	1829	1648	3438	GNG10 Guanine nucleotide-binding protein G(I)/G(S)/G(O) subunit gamma-10 [REVIEWED] ENSG00000242616;ENSG00000059769;IPI00030059;P50151;Q3B7K2;Q4VC27
U	R.IKVSQAAAELQQYCM(15.994915)QNAC(398.2529)K.D	1391	1215	0	1839	0	2057
U	R.IKVSQAAAELQQYCM(15.994915)QNAC(398.2529)KDALLVGVPAGSNPFREPR.S	1905	2553	1470	1886	2252	2180
P47928	9	0.522	16622	9	42358	38177.7	318173	ID4 DNA-binding protein inhibitor ID-4 [REVIEWED] ENSG00000172201;IPI00026864;P47928;Q13005
U	R.KAPSGC(398.2529)GGGELALR.C	25207	20843	22326	24615	20956	25539
U	R.KAPSGC(398.2529)GGGELALR.C	79266	77932	75750	80726	80903	79918
U	R.KAPSGC(398.2529)GGGELALR.C	81244	75224	82946	81846	74053	76697
U	R.KAPSGC(398.2529)GGGELALR.C	5452	5816	5207	3940	4445	6576
U	R.C(398.2529)LAEHGHSLGGSAAAAAAAAAAR.C	83525	76795	71460	67574	68927	80362
U	R.C(398.2529)LAEHGHSLGGSAAAAAAAAAAR.C	44292	65735	49296	64343	71268	59253
U	K.AAEAAADEPALCLQC(398.2529)DM(15.994915)NDCYSR.L	1283	1442	2097	1288	0	2598
U	K.AAEAAADEPALCLQC(398.2529)DM(15.994915)NDCYSR.L	0	0	0	1160	0	0
U	R.TPLTALNTDPAGAVNKQGDSILC(398.2529)R.-	23330	24989	20784	24369	27192	27317
P60709	50	0.515	41737	50	22336.6	20131.8	723933	ACTB Actin, cytoplasmic 1 [REVIEWED] ENSG00000075624;IPI00021439;P60709;P02570;P70514;P99021;Q11211;Q64316;Q75MN2;Q96B34;Q96HG5
U	R.TTGIVM(15.994915)DSGDGVTHTVPIYEGYALPHAILR.L	19752	20734	19892	9706	12396	22097
	K.EKLC(398.2529)YVALDFEQEMATAASSSSLEK.S	1498	2036	0	0	1606	2153
	K.LC(398.2529)YVALDFEQEM(15.994915)ATAA.S	4247	2327	1557	2116	2080	3432
	K.LC(398.2529)YVALDFEQEMATAASSSSLEK.S	1671	0	1732	0	2645	0
	K.LC(398.2529)YVALDFEQEMATAASSSSLEK.S	1872	1649	1484	1885	2019	2536
	K.LC(398.2529)YVALDFEQEMATAASSSSLEK.S	2612	3183	3551	3209	1088	3335
	K.LC(398.2529)YVALDFEQEMATAASSSSLEK.S	19154	19795	19948	18837	15721	15472
	K.LC(398.2529)YVALDFEQEMATAASSSSLEK.S	11641	13545	11274	11849	12431	11781
	K.LC(398.2529)YVALDFEQEM(15.994915)ATAASSSSLEK.S	5596	6667	4036	5920	4096	4156
	K.LC(398.2529)YVALDFEQEM(15.994915)ATAASSSSLEK.S	34140	39168	35306	37876	30209	31132
	K.LC(398.2529)YVALDFEQEM(15.994915)ATAASSSSLEK.S	1502	1988	2094	1741	1179	0
	K.LC(398.2529)YVALDFEQEM(15.994915)ATAASSSSLEK.S	1254	0	1857	1839	1629	0
	K.LC(398.2529)YVALDFEQEM(15.994915)ATAASSSSLEK.S	39802	41669	38325	38188	33849	33301
	K.LC(398.2529)YVALDFEQEM(15.994915)ATAASSSSLEK.S	8793	9187	9798	11032	9579	10224
	K.LC(398.2529)YVALDFEQEM(15.994915)ATAASSSSLEK.S	19811	22304	20036	22784	22222	20474
	K.LC(398.2529)YVALDFEQEM(15.994915)ATAASSSSLEK.S	14316	17090	15749	15333	9731	15681
U	R.FRCPEALFQPSFLGMESC(398.2529)GIHETTFNSIM(15.994915)K.C	11625	10113	10535	13477	10147	10808
U	R.FRCPEALFQPSFLGMESC(398.2529)GIHETTFNSIM(15.994915)K.C	12973	12384	11112	13355	12272	14614
U	R.FRCPEALFQPSFLGMESC(398.2529)GIHETTFNSIM(15.994915)K.C	5506	4347	5505	7782	4203	5760
U	R.FRCPEALFQPSFLGMESC(398.2529)GIHETTFNSIM(15.994915)K.C	10962	11477	10891	10232	11216	12716
U	R.FRCPEALFQPSFLGMESC(398.2529)GIHETTFNSIM(15.994915)K.C	3255	2014	3176	3396	4377	4380
U	R.FRCPEALFQPSFLGMESC(398.2529)GIHETTFNSIM(15.994915)K.C	1807	1869	1444	1121	1220	1308
U	R.FRCPEALFQPSFLGM(15.994915)ESC(398.2529)GIHETTFNSIMK.C	1319	0	2289	0	0	1557
U	R.FRCPEALFQPSFLGMESC(398.2529)GIHETTFNSIM(15.994915)K.C	20746	18341	17184	16893	16500	15400
U	R.CPEALFQPSFLGMESC(398.2529)GIHETTFNSIM(15.994915)K.C	24253	19245	19033	22635	24473	18243
U	R.CPEALFQPSFLGMESC(398.2529)GIHETTFNSIM(15.994915)K.C	18837	18320	14298	21085	18043	17889
U	R.CPEALFQPSFLGMESC(398.2529)GIHETTFNSIM(15.994915)K.C	17785	16911	16563	17962	11951	17046
U	R.CPEALFQPSFLGM(15.994915)ESC(398.2529)GIHETTFNSIMK.C	3764	3117	2993	4623	2349	3178
	K.C(398.2529)DVDIR.K	185603	182653	214922	188785	194092	189457
U	K.C(398.2529)DVDIRKDLYANTVLSGGTTM(15.994915)YPGIADR.M	18277	17904	20195	20120	20829	22501
U	K.C(398.2529)DVDIRKDLYANTVLSGGTTM(15.994915)YPGIADR.M	19262	16428	23127	18965	22990	25745
U	R.KDLYANTVLSGGTTM(15.994915)YPGIADR.M	15368	15834	15737	11398	16118	19196
U	K.DLYANTVLSGGTTM(15.994915)YPGIADR.M	11212	16547	11080	5430	8159	18118
U	K.DLYANTVLSGGTTM(15.994915)YPGIADR.M	12144	10178	10642	5015	8006	13075
	R.M(15.994915)QKEITALAPSTM(15.994915)K.I	48237	57864	50106	28977	31484	82794
	K.EITALAPSTM(15.994915)K.I	134414	155406	152908	56028	82320	180908
	R.KYSVWIGGSILASLSTFQQM(15.994915)WISK.Q	0	1262	0	1170	0	1739
	K.YSVWIGGSILASLSTFQQM(15.994915)WISK.Q	0	0	0	0	0	2306
P60981	40	0.509	18506	40	107155	96580	2856855	DSTN Destrin [REVIEWED] ENSG00000125868;IPI00845388;P60981;B2R6N2;B4DYA6;P18282;Q5W166;Q6IAW2
U	R.KC(398.2529)STPEEIK.K	569458	544290	623448	549987	529617	498650
U	R.KC(398.2529)STPEEIK.K	151057	136336	138572	135009	139778	131604
U	R.KC(398.2529)STPEEIKK.R	1051166	1099095	999584	1039766	1144359	947241
U	R.KC(398.2529)STPEEIKKR.K	21692	29406	29464	31332	36554	27657
U	K.C(398.2529)STPEEIK.K	25511	26751	25276	19134	23919	19200
U	K.AVIFC(398.2529)LSADKK.C	65999	65346	64270	65386	63306	54804
U	K.C(398.2529)IIVEEGKEILVGDVGVTITDPFK.H	1229	1518	0	1221	0	1274
U	K.FQGIKHEC(398.2529)QANGPEDLNR.A	69140	79454	72423	74952	61841	60967
U	R.AC(398.2529)IAEK.L	107449	113431	104787	115400	100189	115664
U	R.AC(398.2529)IAEK.L	4895	3537	2813	3840	6286	3951
U	K.LGGSLIVAFEGC(398.2529)PV.-	16275	17584	18303	15442	12903	16143
U	K.LGGSLIVAFEGC(398.2529)PV.-	213840	215725	207007	213511	205195	229351
U	K.LGGSLIVAFEGC(398.2529)PV.-	310925	318444	314018	315592	295320	320150
U	K.LGGSLIVAFEGC(398.2529)PV.-	38460	41077	40125	42942	38023	44009
U	K.LGGSLIVAFEGC(398.2529)PV.-	0	1592	0	0	1375	0
U	K.LGGSLIVAFEGC(398.2529)PV.-	0	1285	0	0	1171	0
U	K.LGGSLIVAFEGC(398.2529)PV.-	156627	156438	141293	147284	127004	161815
U	K.LGGSLIVAFEGC(398.2529)PV.-	23963	21803	22065	23492	20643	25682
U	K.LGGSLIVAFEGC(398.2529)PV.-	6461	7266	7560	7205	7766	9571
U	K.LGGSLIVAFEGC(398.2529)PV.-	4691	3779	4857	5487	4991	3493
U	K.LGGSLIVAFEGC(398.2529)PV.-	2617	1733	1584	1727	1263	2482
U	K.LGGSLIVAFEGC(398.2529)PV.-	0	0	0	0	2484	1588
U	K.LGGSLIVAFEGC(398.2529)PV.-	0	1573	0	1862	0	0
U	K.LGGSLIVAFEGC(398.2529)PV.-	193127	192614	191405	183383	174272	197666
U	K.LGGSLIVAFEGC(398.2529)PV.-	17802	15174	17966	15337	15297	19010
U	K.LGGSLIVAFEGC(398.2529)PV.-	8733	9327	7748	8893	6688	7068
U	K.LGGSLIVAFEGC(398.2529)PV.-	6534	6480	4688	5970	6177	4899
U	K.LGGSLIVAFEGC(398.2529)PV.-	3457	2984	3290	3626	3064	4050
U	K.LGGSLIVAFEGC(398.2529)PV.-	2781	2138	2119	2199	2821	3234
U	K.LGGSLIVAFEGC(398.2529)PV.-	10695	11160	11265	12334	7940	10196
U	K.LGGSLIVAFEGC(398.2529)PV.-	2853	2022	4372	3059	3917	2715
U	K.LGGSLIVAFEGC(398.2529)PV.-	3124	2294	4802	3056	4211	4355
Q96GX2	11	0.505	10771	11	36917.9	33274.2	250943	ATXN7L3B Putative ataxin-7-like protein 3B [REVIEWED] ENSG00000253719;IPI00062860;Q96GX2
U	K.C(398.2529)GYFYLEFAETGSVK.D	8895	5894	8047	7028	6414	6909
U	K.DFGIQPVEDKGAC(398.2529)R.L	66225	64909	60332	65290	48900	50593
U	K.DFGIQPVEDKGAC(398.2529)R.L	108106	88537	104989	94047	85978	73490
U	K.GAC(398.2529)RLPLCSLPGEPGNGPDQQLQR.S	27157	28992	24562	29002	24159	27141
U	K.GACRLPLC(398.2529)SLPGEPGNGPDQQLQR.S	22417	20879	19618	21868	15804	20500
U	R.LPLC(398.2529)SLPGEPGNGPDQQLQR.S	33057	35308	28747	28743	21739	27592
U	R.LPLC(398.2529)SLPGEPGNGPDQQLQR.S	13035	13927	15725	13259	9285	11658
U	R.LPLC(398.2529)SLPGEPGNGPDQQLQR.S	11783	8243	11028	8291	6478	8363
U	R.LPLC(398.2529)SLPGEPGNGPDQQLQR.S	8793	8391	6138	7533	5267	6218
Q15365	71	0.48	37498	71	69491.1	62633.1	2922168	PCBP1 Poly(rC)-binding protein 1 [REVIEWED] ENSG00000169564;IPI00016610;Q15365;Q13157;Q14975
	R.INISEGNC(398.2529)PER.I	156875	160088	157168	159561	165265	179226
	R.INISEGNC(398.2529)PER.I	55888	57190	49268	52021	56137	52096
	R.INISEGNC(398.2529)PER.I	1736	1348	0	2068	2049	0
	R.INISEGNC(398.2529)PER.I	35584	28188	28757	29268	27563	31228
	R.INISEGNC(398.2529)PER.I	96998	93297	88498	85988	84226	95882
	R.INISEGNC(398.2529)PER.I	6936	5949	6469	6716	6539	5845
	R.INISEGNC(398.2529)PER.I	2305	1461	2407	1180	2165	1363
	R.INISEGNC(398.2529)PER.I	6128	5614	6061	5917	6092	7503
	R.INISEGNC(398.2529)PER.I	5324	5224	6214	5358	4214	5581
	R.INISEGNC(398.2529)PER.I	0	2334	1893	0	0	1400
	R.INISEGNC(398.2529)PER.I	487786	443800	419496	430016	407331	410104
	R.INISEGNC(398.2529)PER.I	81658	84664	77193	84439	77121	86744
	R.INISEGNC(398.2529)PER.I	16707	20421	18584	20475	17627	18318
	R.INISEGNC(398.2529)PER.I	504665	508266	585173	564800	580156	587579
	R.INISEGNC(398.2529)PER.I	19106	17734	16277	15982	15966	17813
U	R.LVVPATQC(398.2529)GSLIGK.G	61009	60828	52412	55917	55700	64805
U	R.LVVPATQC(398.2529)GSLIGK.G	77098	80720	71685	76785	56219	94580
U	R.LVVPATQC(398.2529)GSLIGK.G	8288	9408	10280	12864	10778	11729
U	R.LVVPATQC(398.2529)GSLIGK.G	0	0	1451	0	0	0
U	R.LVVPATQC(398.2529)GSLIGK.G	5065	5847	4104	5323	3025	4103
U	R.LVVPATQC(398.2529)GSLIGK.G	4482	7832	5302	5762	7031	5824
U	R.LVVPATQC(398.2529)GSLIGK.G	1926	0	0	2103	0	0
U	R.LVVPATQC(398.2529)GSLIGK.G	10129	12310	10907	9127	10381	11128
U	R.LVVPATQC(398.2529)GSLIGK.G	24304	25608	23193	21981	24441	24472
U	R.LVVPATQC(398.2529)GSLIGK.G	256281	244463	219896	228934	204690	201606
U	R.LVVPATQC(398.2529)GSLIGK.G	65300	67944	74256	78780	77948	82473
U	R.LVVPATQCGSLIGKGGC(398.2529)K.I	25098	33209	31777	37684	33637	75546
	R.ESTGAQVQVAGDM(15.994915)LPNSTER.A	3387	3673	2707	0	2417	5255
U	R.AITIAGVPQSVTEC(398.2529)VK.Q	85239	96362	99742	98394	93066	90101
U	R.AITIAGVPQSVTEC(398.2529)VK.Q	8508	7560	10287	10445	9102	11124
U	K.QIC(398.2529)LVMLETLSQSPQGR.V	6320	4688	5897	6605	6863	6329
U	K.QIC(398.2529)LVMLETLSQSPQGR.V	7635	6978	7377	8946	7488	8916
U	K.QIC(398.2529)LVM(15.994915)LETLSQSPQGR.V	11060	9909	10101	9043	8496	7749
U	R.VM(15.994915)TIPYQPMPASSPVIC(398.2529)AGGQDR.C	1703	2373	2006	3059	1727	2008
U	R.VMTIPYQPM(15.994915)PASSPVIC(398.2529)AGGQDR.C	51679	47028	49218	52456	44762	52021
U	R.VMTIPYQPM(15.994915)PASSPVIC(398.2529)AGGQDR.C	16601	16681	14263	15105	13059	13345
U	R.VM(15.994915)TIPYQPMPASSPVIC(398.2529)AGGQDR.C	146406	124476	130520	135670	122439	123613
U	R.C(398.2529)SDAAGYPHATHDLEGPPLDAYSIQGQHTISPLDLAK.L	22758	25846	18972	22901	23820	23843
U	R.C(398.2529)SDAAGYPHATHDLEGPPLDAYSIQGQHTISPLDLAK.L	6344	7900	6612	7667	5226	7171
U	R.C(398.2529)SDAAGYPHATHDLEGPPLDAYSIQGQHTISPLDLAK.L	4032	2110	3374	3430	3091	2418
U	R.C(398.2529)SDAAGYPHATHDLEGPPLDAYSIQGQHTISPLDLAK.L	268884	289269	287393	273107	225730	258939
U	R.C(398.2529)SDAAGYPHATHDLEGPPLDAYSIQGQHTISPLDLAK.L	298724	267311	258625	286237	229732	261360
U	R.C(398.2529)SDAAGYPHATHDLEGPPLDAYSIQGQHTISPLDLAK.L	48204	45222	45263	44166	41104	39209
U	K.GYWASLDASTQTTHELTIPNNLIGC(398.2529)IIGR.Q	39288	39056	35583	44155	37001	40662
U	K.GYWASLDASTQTTHELTIPNNLIGC(398.2529)IIGR.Q	4472	5656	5369	6237	5261	4985
U	K.GYWASLDASTQTTHELTIPNNLIGC(398.2529)IIGR.Q	63496	69236	62055	72299	56712	65514
U	K.GYWASLDASTQTTHELTIPNNLIGC(398.2529)IIGR.Q	9079	10048	7966	10381	6804	8118
U	K.GYWASLDASTQTTHELTIPNNLIGC(398.2529)IIGR.Q	14861	15661	17538	13952	12258	14700
U	K.GYWASLDASTQTTHELTIPNNLIGC(398.2529)IIGR.Q	57998	56425	48271	54314	49893	49570
U	K.GYWASLDASTQTTHELTIPNNLIGC(398.2529)IIGR.Q	12679	10647	14052	11907	12414	12403
U	K.GYWASLDASTQTTHELTIPNNLIGC(398.2529)IIGR.Q	41324	43534	39539	42787	44343	45305
U	K.GYWASLDASTQTTHELTIPNNLIGC(398.2529)IIGR.Q	9566	11849	10725	11629	11133	12361
P63244	61	0.473	35077	61	83545.2	75300.3	3239124	GNB2L1 Guanine nucleotide-binding protein subunit beta-2-like 1 [REVIEWED] ENSG00000204628;IPI00848226;P63244;B3KTJ0;D3DWS0;P25388;P99049;Q53HU2;Q5J8M6;Q5VLR4;Q6FH47
U	K.TIKLWNTLGVC(398.2529)K.Y	0	0	0	1422	1360	0
U	K.TIKLWNTLGVC(398.2529)K.Y	0	1856	1728	1986	2070	1681
U	K.TIKLWNTLGVC(398.2529)K.Y	1769	0	2402	0	1708	1729
U	K.TIKLWNTLGVC(398.2529)K.Y	2706	1354	1805	2126	1698	3143
U	K.LWNTLGVC(398.2529)K.Y	135707	156322	133802	132462	139486	130237
U	K.LWNTLGVC(398.2529)K.Y	0	0	0	2156	0	0
U	K.LWNTLGVC(398.2529)K.Y	4816	6393	5362	4905	4072	4565
U	K.LWNTLGVC(398.2529)K.Y	878230	945812	882046	774374	791141	722524
U	K.LWNTLGVC(398.2529)K.Y	15170	15351	14832	13135	13508	13966
U	K.YTVQDESHSEWVSC(398.2529)VR.F	18389	19387	19002	14450	16480	15794
U	K.YTVQDESHSEWVSC(398.2529)VR.F	11940	14163	13077	12729	12623	10607
U	K.YTVQDESHSEWVSC(398.2529)VR.F	20033	19713	15359	20208	18303	23305
U	K.YTVQDESHSEWVSC(398.2529)VR.F	7734	8087	8077	8222	5760	5443
U	R.FSPNSSNPIIVSC(398.2529)GWDK.L	54348	53096	57583	47365	59068	42873
U	R.FSPNSSNPIIVSC(398.2529)GWDK.L	1141	2926	0	1942	1911	1347
U	R.FSPNSSNPIIVSC(398.2529)GWDK.L	1120	0	0	0	0	0
U	R.FSPNSSNPIIVSC(398.2529)GWDK.L	153761	151678	146345	115136	143193	106455
U	R.FSPNSSNPIIVSC(398.2529)GWDK.L	7566	7700	6381	6454	7117	5085
U	R.FSPNSSNPIIVSC(398.2529)GWDKLVK.V	2842	3810	4443	4852	5368	4396
U	R.FSPNSSNPIIVSC(398.2529)GWDKLVK.V	1870	3186	3553	2278	2853	3031
U	R.FSPNSSNPIIVSC(398.2529)GWDKLVK.V	36218	41913	39431	41571	46010	52184
U	R.FSPNSSNPIIVSC(398.2529)GWDKLVK.V	10742	12001	11398	14288	13998	16151
U	K.VWNLANC(398.2529)K.L	299157	314832	313550	265935	312158	296653
U	K.VWNLANC(398.2529)K.L	230582	233918	241038	203676	209183	179367
U	K.VWNLANC(398.2529)K.L	31479	28017	32253	28581	33561	24373
U	K.VWNLANC(398.2529)K.L	493650	501948	485380	417361	480336	423730
U	K.VWNLANC(398.2529)K.L	213381	187087	227356	188078	233163	183970
U	K.TNHIGHTGYLNTVTVSPDGSLC(398.2529)ASGGK.D	11733	14624	11899	12080	15021	10082
U	K.TNHIGHTGYLNTVTVSPDGSLC(398.2529)ASGGK.D	7885	10387	8682	8038	11081	8237
U	K.HLYTLDGGDIINALC(398.2529)FSPNR.Y	10772	7449	10312	9521	9442	6803
U	K.HLYTLDGGDIINALC(398.2529)FSPNR.Y	17844	17240	15819	14377	15285	10789
U	K.HLYTLDGGDIINALC(398.2529)FSPNR.Y	3900	3811	3466	2446	3963	2549
U	K.HLYTLDGGDIINALC(398.2529)FSPNR.Y	2484	0	3878	2808	2349	3307
U	K.HLYTLDGGDIINALCFSPNRYWLC(398.2529)AATGPSIK.I	3696	4368	3334	1491	6549	5281
U	R.YWLC(398.2529)AATGPSIK.I	77286	78768	80218	59893	87849	62516
U	R.YWLC(398.2529)AATGPSIK.I	25457	23809	25745	21739	28727	20171
U	R.YWLC(398.2529)AATGPSIK.I	0	0	2001	0	0	0
U	R.YWLC(398.2529)AATGPSIK.I	873	0	0	1099	0	0
U	R.YWLC(398.2529)AATGPSIK.I	1125	0	0	0	0	0
U	R.YWLC(398.2529)AATGPSIK.I	500235	499763	407440	339117	470947	337488
U	R.YWLC(398.2529)AATGPSIK.I	98127	92924	103620	75854	111900	74362
U	R.YWLC(398.2529)AATGPSIK.I	41377	39168	45170	36471	45406	38242
U	R.YWLC(398.2529)AATGPSIKIWDLEGK.I	4321	875	2578	3569	3994	4825
U	K.AEPPQC(398.2529)TSLAWSADGQTLFAGYTDNLVR.V	2058	2158	3707	3036	2397	0
U	K.AEPPQC(398.2529)TSLAWSADGQTLFAGYTDNLVR.V	8301	11985	8728	8920	7588	5667
U	K.AEPPQC(398.2529)TSLAWSADGQTLFAGYTDNLVR.V	11989	12813	12663	12258	10822	9322
P62633	14	0.463	19463	14	35589	32076.4	428986	CNBP Cellular nucleic acid-binding protein [REVIEWED] ENSG00000169714;IPI00967344;P62633;B2RAV9;D3DNB9;D3DNC0;D3DNC1;P20694;Q4JGY0;Q5QJR0;Q5U0E9;Q6PJI7;Q96NV3
U	R.GFQFVSSSLPDIC(398.2529)YR.C	2740	4249	5346	6533	5029	6759
U	R.GFQFVSSSLPDIC(398.2529)YR.C	13508	12590	14024	14736	9569	14558
U	K.DC(398.2529)DLQEDACYNCGR.G	1029	0	0	0	0	1348
U	K.DC(398.2529)DLQEDACYNCGR.G	1671	1548	0	1215	0	1935
U	R.EQC(398.2529)CYNCGKPGHLAR.D	64804	73687	81098	70050	85781	81644
U	R.DC(398.2529)DHADEQK.C	54500	55861	56754	54712	55668	62614
U	R.C(398.2529)GETGHVAINCSK.T	44216	45899	43452	49727	47681	51113
U	K.TSEVNC(398.2529)YR.C	16481	21722	20952	18729	20814	18699
U	R.EC(398.2529)TIEATA.-	9502	14102	9617	10842	9212	13541
U	R.EC(398.2529)TIEATA.-	21515	22942	27379	21775	20086	21603
U	R.EC(398.2529)TIEATA.-	29716	31491	32395	30193	25888	29253
U	R.EC(398.2529)TIEATA.-	162663	160091	156063	169127	154318	167888
U	R.EC(398.2529)TIEATA.-	19704	17637	16784	19703	18607	24676
U	R.EC(398.2529)TIEATA.-	7021	8426	9168	9228	6909	9015
P63279	8	0.456	18007	8	19309.5	17403.2	138524	UBE2I SUMO-conjugating enzyme UBC9 [REVIEWED] ENSG00000103275;IPI00032957;P63279;D3DU69;P50550;Q15698;Q59GX1;Q86VB3
U	K.C(398.2529)KFEPPLFHPNVYPSGTVCLSILEEDKDWRPAITIK.Q	47074	54124	47133	54460	64969	41461
U	K.C(398.2529)KFEPPLFHPNVYPSGTVCLSILEEDKDWRPAITIK.Q	43586	49822	44771	52002	64228	38670
U	K.QILLGIQELLNEPNIQDPAQAEAYTIYC(398.2529)QNR.V	4110	3000	2869	2824	1509	2195
U	K.QILLGIQELLNEPNIQDPAQAEAYTIYC(398.2529)QNR.V	22463	27277	22026	21913	20975	20995
U	K.QILLGIQELLNEPNIQDPAQAEAYTIYC(398.2529)QNR.V	1832	0	0	0	0	0
U	K.QILLGIQELLNEPNIQDPAQAEAYTIYC(398.2529)QNR.V	11737	11163	10299	10612	9885	10805
U	K.QILLGIQELLNEPNIQDPAQAEAYTIYC(398.2529)QNRVEYEK.R	2688	2916	3487	3767	2827	3130
U	K.QILLGIQELLNEPNIQDPAQAEAYTIYC(398.2529)QNRVEYEK.R	5736	3543	4684	3713	3604	4242
Q99497	23	0.45	19891	23	106658	96132.4	1166898	PARK7 Protein DJ-1 [REVIEWED] ENSG00000116288;IPI00298547;Q99497;B2R4Z1;O14805;Q6DR95;Q7LFU2
U	R.AGIKVTVAGLAGKDPVQC(398.2529)SR.D	177727	261615	245504	215910	211635	223362
U	K.VTVAGLAGKDPVQC(398.2529)SR.D	775165	932998	831975	748665	717824	759783
U	R.DVVIC(398.2529)PDASLEDAKK.E	10335	9133	9543	7521	8204	6525
U	R.DVVIC(398.2529)PDASLEDAKK.E	15538	12290	13276	14215	17194	13499
U	R.DVVIC(398.2529)PDASLEDAKKEGPYDVVVLPGGNLGAQNLSESAAVK.E	40956	29700	35881	34927	34265	32127
U	R.KGLIAAIC(398.2529)AGPTALLAHEIGFGSK.V	6979	6173	6288	7012	5889	6413
U	R.KGLIAAIC(398.2529)AGPTALLAHEIGFGSK.V	23299	20138	21860	23623	22109	23333
U	K.GLIAAIC(398.2529)AGPTALLAHEIGFGSK.V	3729	4371	4003	4472	2752	2823
U	K.GLIAAIC(398.2529)AGPTALLAHEIGFGSK.V	2179	1235	3213	2538	2439	2000
U	K.GLIAAIC(398.2529)AGPTALLAHEIGFGSK.V	1549	1490	1507	1264	1447	1785
U	K.GLIAAIC(398.2529)AGPTALLAHEIGFGSK.V	0	0	0	0	0	1654
P0CW22	6	0.444	15550	6	113432	102238	527239	RPS17L 40S ribosomal protein S17-like [REVIEWED] ENSG00000182774;IPI00221093;P0CW22
U	R.VC(398.2529)EEIAIIPSK.K	217934	205774	196406	201342	187416	207343
U	R.VC(398.2529)EEIAIIPSKK.L	368885	344418	320724	336783	365983	356167
U	R.DNYVPEVSALDQEIIEVDPDTKEM(15.994915)LK.L	5709	6946	9604	3747	6163	10168
U	R.DNYVPEVSALDQEIIEVDPDTKEM(15.994915)LK.L	6057	4846	6881	1596	4078	8883
U	R.DNYVPEVSALDQEIIEVDPDTKEM(15.994915)LK.L	5203	6277	4926	2414	2382	5614
U	K.LLDFGSLSNLQVTQPTVGM(15.994915)NFK.T	9637	9693	9443	6713	7971	10323
P25398	14	0.439	14515	14	124928	112600	1509114	RPS12 40S ribosomal protein S12 [REVIEWED] ENSG00000112306;IPI00013917;P25398;Q76M58
U	R.QAHLCVLASNC(398.2529)DEPM(15.994915)YVK.L	20183	18418	19482	18138	21816	21207
U	R.QAHLC(398.2529)VLASNCDEPM(15.994915)YVK.L	10968	8841	8029	10867	11040	10079
U	R.QAHLCVLASNC(398.2529)DEPM(15.994915)YVK.L	13499	10656	10848	11925	11699	12136
U	K.LVEALC(398.2529)AEHQINLIK.V	82494	75958	70308	67772	76853	61581
U	K.KLGEWVGLC(398.2529)K.I	168772	198147	186731	194289	181165	196563
U	K.KLGEWVGLC(398.2529)K.I	82357	82268	81082	82529	89687	89066
U	K.LGEWVGLC(398.2529)K.I	87773	77175	90862	86798	86248	92173
U	K.LGEWVGLC(398.2529)K.I	193331	183481	180320	196641	182416	203872
U	K.LGEWVGLC(398.2529)K.I	294458	303386	287204	310109	280555	301493
U	K.LGEWVGLC(398.2529)K.I	248610	267672	255858	241284	241517	249474
U	K.LGEWVGLC(398.2529)K.I	13762	14819	14363	13739	16574	14419
U	R.KVVGC(398.2529)SCVVVK.D	185164	198938	205794	189221	184779	182063
U	R.KVVGC(398.2529)SCVVVKDYGK.E	93693	116511	105425	115762	104090	109787
U	R.KVVGCSC(398.2529)VVVKDYGK.E	81331	98008	104596	103539	106093	95288
Q0VGL1	1	0.434	10741	1	0	0	0	C7orf59 UPF0539 protein C7orf59 [REVIEWED] ENSG00000188186;IPI00924667;Q0VGL1
U	R.IPDQLGYLVLSEGAVLASSGDLENDEQAASAISELVSTAC(398.2529)GFR.L	0	0	0	1092	0	0
P62873	14	0.424	37377	14	15156.5	13660.3	175053	GNB1 Guanine nucleotide-binding protein G(I)/G(S)/G(T) subunit beta-1 [REVIEWED] ENSG00000078369;IPI00026268;P62873;B1AJZ7;P04697;P04901
U	R.KAC(398.2529)ADATLSQITNNIDPVGR.I	66382	66902	58379	61254	74429	66448
U	K.AC(398.2529)ADATLSQITNNIDPVGR.I	6830	7220	6411	5753	6075	7527
U	K.AC(398.2529)ADATLSQITNNIDPVGR.I	3335	1942	0	1786	0	2091
	R.SSWVM(15.994915)TCAYAPSGNYVACGGLDNIC(398.2529)SIYNLK.T	5065	6366	3874	4865	7129	5439
U	R.ELAGHTGYLSC(398.2529)CR.F	12184	12442	12790	12713	11014	13071
U	R.ELAGHTGYLSCC(398.2529)R.F	20582	23152	19498	16562	19778	20244
U	R.LFVSGAC(398.2529)DASAK.L	16303	17656	15765	16210	16314	14247
U	R.ADQELM(15.994915)TYSHDNIIC(398.2529)GITSVSFSK.S	13006	13413	9694	13987	12747	12407
U	R.LLLAGYDDFNC(398.2529)NVWDALK.A	6128	6487	6851	5762	5330	4390
U	R.LLLAGYDDFNC(398.2529)NVWDALK.A	14468	12172	13222	12505	14977	11785
U	R.LLLAGYDDFNC(398.2529)NVWDALK.A	2237	2601	1263	2821	2701	1716
U	R.LLLAGYDDFNC(398.2529)NVWDALKADR.A	2201	2543	3002	2663	2912	2599
	R.VSC(398.2529)LGVTDDGM(15.994915)AVATGSWDSFLK.I	7127	5947	6940	8107	4969	7286
	R.VSC(398.2529)LGVTDDGM(15.994915)AVATGSWDSFLK.I	15396	13042	14046	11690	12489	13886
P62879	18	0.424	37331	18	14445.1	13019.1	215483	GNB2 Guanine nucleotide-binding protein G(I)/G(S)/G(T) subunit beta-2 [REVIEWED] ENSG00000172354;IPI00003348;P62879;P11016;P54312
U	R.KAC(398.2529)GDSTLTQITAGLDPVGR.I	30391	29681	26721	30730	32934	27732
U	K.AC(398.2529)GDSTLTQITAGLDPVGR.I	5190	6955	5787	5353	4702	5617
U	K.AC(398.2529)GDSTLTQITAGLDPVGR.I	14211	15673	11083	13304	12691	10458
U	R.SSWVMTCAYAPSGNFVACGGLDNIC(398.2529)SIYSLK.T	2019	3203	1206	3474	2630	2488
U	R.SSWVM(15.994915)TCAYAPSGNFVACGGLDNIC(398.2529)SIYSLK.T	3247	3367	5146	4142	5779	5055
U	R.SSWVM(15.994915)TCAYAPSGNFVACGGLDNIC(398.2529)SIYSLK.T	2899	1643	2935	1519	3394	1980
	R.ELPGHTGYLSCC(398.2529)R.F	33137	38304	31557	31970	30571	32843
	R.ELPGHTGYLSC(398.2529)CR.F	30098	30358	37137	36830	28568	31844
	R.ELPGHTGYLSCC(398.2529)R.F	16281	17767	19472	19533	17210	18957
U	R.TFVSGAC(398.2529)DASIK.L	7385	7548	9449	9535	8618	7574
U	R.TFVSGAC(398.2529)DASIK.L	4762	3184	5396	4496	5343	5714
U	R.ADQELLM(15.994915)YSHDNIIC(398.2529)GITSVAFSR.S	0	0	0	1541	2296	0
U	R.ADQELLM(15.994915)YSHDNIIC(398.2529)GITSVAFSR.S	8489	6276	5544	7162	6900	4154
U	R.LLLAGYDDFNC(398.2529)NIWDAM(15.994915)K.G	11096	11210	12274	10821	11049	9492
U	R.LLLAGYDDFNC(398.2529)NIWDAM(15.994915)K.G	1598	1475	1787	923	1170	0
U	R.LLLAGYDDFNC(398.2529)NIWDAM(15.994915)KGDR.A	41018	40571	36967	40244	39459	36222
	R.VSC(398.2529)LGVTDDGM(15.994915)AVATGSWDSFLK.I	7127	5947	6940	8107	4969	7286
	R.VSC(398.2529)LGVTDDGM(15.994915)AVATGSWDSFLK.I	15396	13042	14046	11690	12489	13886
Q9BQA1	26	0.418	36724	26	11481.7	10348.2	239051	WDR77 Methylosome protein 50 [REVIEWED] ENSG00000116455;IPI00012202;Q9BQA1;B3KMW6;Q3LID2;Q53FU2;Q6JZZ5;Q96GK4;Q9BWY3
U	R.EWNLPPNAPAC(398.2529)MER.Q	2174	2557	2312	2504	1395	1971
U	R.EWNLPPNAPAC(398.2529)MER.Q	4039	2981	3703	3018	2992	4080
U	R.EWNLPPNAPAC(398.2529)MER.Q	1757	1806	0	1743	2057	1568
U	R.EWNLPPNAPAC(398.2529)M(15.994915)ER.Q	5701	5277	5245	7063	4160	5221
U	R.EWNLPPNAPAC(398.2529)M(15.994915)ER.Q	3260	1342	0	1161	2072	2133
U	R.EWNLPPNAPAC(398.2529)M(15.994915)ER.Q	2131	1533	2665	3125	2490	2661
U	R.EWNLPPNAPAC(398.2529)M(15.994915)ER.Q	6101	5680	4910	7880	4257	4603
U	R.EWNLPPNAPAC(398.2529)M(15.994915)ER.Q	13817	11912	15145	12433	13083	12630
U	R.EWNLPPNAPAC(398.2529)M(15.994915)ER.Q	30534	30861	29883	34070	30524	34258
U	R.EWNLPPNAPAC(398.2529)M(15.994915)ER.Q	6476	7371	8117	8981	6760	8083
U	R.EWNLPPNAPAC(398.2529)M(15.994915)ER.Q	12181	11040	11565	9674	11009	9881
U	R.EWNLPPNAPAC(398.2529)M(15.994915)ER.Q	10719	12384	10717	11503	10424	10945
U	R.EWNLPPNAPAC(398.2529)M(15.994915)ER.Q	17158	15858	16535	15624	15165	17313
U	R.EWNLPPNAPAC(398.2529)M(15.994915)ER.Q	6612	7047	7236	6475	5087	4841
U	R.EWNLPPNAPAC(398.2529)M(15.994915)ER.Q	3229	3231	4775	3928	2551	3766
U	K.DPC(398.2529)AAPNEGFCSAGVQTEAGVADLTWVGER.G	3989	4064	4356	2953	4662	2815
U	K.DPC(398.2529)AAPNEGFCSAGVQTEAGVADLTWVGER.G	2102	1257	2328	1274	2493	1385
U	K.DPC(398.2529)AAPNEGFCSAGVQTEAGVADLTWVGER.G	27614	26415	26032	26169	21685	21487
U	K.DPC(398.2529)AAPNEGFCSAGVQTEAGVADLTWVGER.G	1381	1454	0	0	0	1678
U	K.DPC(398.2529)AAPNEGFCSAGVQTEAGVADLTWVGER.G	2675	2600	5492	3216	3188	2888
U	K.DPC(398.2529)AAPNEGFCSAGVQTEAGVADLTWVGER.G	0	0	0	1477	1441	1877
U	K.FC(398.2529)KYEHDDIVSTVSVLSSGTQAVSGSK.D	23105	28371	22592	24318	25533	22413
U	K.FC(398.2529)KYEHDDIVSTVSVLSSGTQAVSGSK.D	10306	6683	7120	9512	9446	6923
U	R.AHAAQVTC(398.2529)VAASPHKDSVFLSCSEDNR.I	14042	15072	11914	14882	11246	9609
U	K.DSVFLSC(398.2529)SEDNR.I	9140	9326	10177	9260	8961	7808
U	R.CPKPASQIGC(398.2529)SAPGYLPTSLAWHPQQSEVFVFGDENGTVSLVDTK.S	48810	45911	50736	50491	48283	44503
Q8N5W9	21	0.416	22882	21	25825.6	23276.5	442445	FAM101B Protein FAM101B [REVIEWED] ENSG00000183688;IPI00166945;Q8N5W9
U	R.AAAPGTLEPDAAAATPAAPSPASLPLAPGC(398.2529)ALR.L	2307	2274	1451	1659	2171	2063
U	R.AAAPGTLEPDAAAATPAAPSPASLPLAPGC(398.2529)ALR.L	3436	4066	3168	3482	0	5531
U	R.AAAPGTLEPDAAAATPAAPSPASLPLAPGC(398.2529)ALR.L	57388	61453	53566	62056	49872	57649
U	R.LC(398.2529)PLSFGEGVEFD.P	2288	3125	3043	4474	3072	3404
U	R.LC(398.2529)PLSFGEGVEFDPLPPK.E	2641	2858	1811	3654	2400	3462
U	R.LC(398.2529)PLSFGEGVEFDPLPPK.E	8312	7863	7627	10034	7404	7694
U	R.LC(398.2529)PLSFGEGVEFDPLPPK.E	3092	3075	4036	2546	2282	2919
U	R.LC(398.2529)PLSFGEGVEFDPLPPKEVR.Y	3218	2431	4397	3175	2339	2638
U	R.LC(398.2529)PLSFGEGVEFDPLPPKEVR.Y	78197	80272	77072	86057	75968	86279
U	R.LC(398.2529)PLSFGEGVEFDPLPPKEVR.Y	14492	15840	14074	17626	14810	16849
U	R.LC(398.2529)PLSFGEGVEFDPLPPKEVR.Y	20073	14884	18500	17338	18923	16870
U	R.LC(398.2529)PLSFGEGVEFDPLPPKEVR.Y	7164	6891	4461	5136	5956	5650
U	R.LC(398.2529)PLSFGEGVEFDPLPPKEVR.Y	22195	20006	18694	22846	24044	23661
U	R.LC(398.2529)PLSFGEGVEFDPLPPKEVR.Y	38561	37816	36339	37610	41457	39334
U	R.LC(398.2529)PLSFGEGVEFDPLPPKEVR.Y	8264	9039	8718	10142	8349	12430
U	K.AVYTTTLDYNC(398.2529)R.K	35452	36033	35893	28995	37896	35463
U	K.AVYTTTLDYNC(398.2529)R.K	42471	44287	49447	46396	47853	49512
U	K.AVYTTTLDYNC(398.2529)R.K	16500	18422	20042	19237	22667	19713
U	K.AVYTTTLDYNC(398.2529)RK.T	6463	7786	5297	7053	8021	7312
U	K.AVYTTTLDYNC(398.2529)RK.T	93017	106576	97505	101999	105341	114050
P41567	10	0.416	12732	10	25646.6	23115.3	204388	EIF1 Eukaryotic translation initiation factor 1 [REVIEWED] ENSG00000173812;IPI00015077;P41567;Q9UNQ9
	K.FAC(398.2529)NGTVIEHPEYGEVIQLQGDQR.K	46912	46985	44471	49429	43163	45058
	K.FAC(398.2529)NGTVIEHPEYGEVIQLQGDQR.K	14433	15339	13993	11427	13979	13470
	K.FAC(398.2529)NGTVIEHPEYGEVIQLQGDQR.K	21914	15082	19872	16978	21419	16156
	K.FAC(398.2529)NGTVIEHPEYGEVIQLQGDQRK.N	10467	11675	8837	10699	8742	9280
	K.FAC(398.2529)NGTVIEHPEYGEVIQLQGDQRK.N	43124	46086	41702	44699	50890	41811
U	K.NIC(398.2529)QFLVEIGLAK.D	7212	9551	7690	8284	8579	7519
U	K.NIC(398.2529)QFLVEIGLAK.D	4070	3368	5099	3016	3194	4469
U	K.NIC(398.2529)QFLVEIGLAKDDQLK.V	3014	3318	4244	4690	3014	4053
U	K.NIC(398.2529)QFLVEIGLAKDDQLK.V	68966	61111	67129	61209	67145	56903
U	K.NIC(398.2529)QFLVEIGLAKDDQLKVHGF.-	11041	11530	11326	11401	10874	11806
O14893	26	0.414	31585	26	24364.3	21959.4	437056	GEMIN2 Gem-associated protein 2 [REVIEWED] ENSG00000092208;IPI00550676;O14893;B2R9W8;Q2M3B3;Q9H4F5;Q9NS77;Q9NS78;Q9NS79
U	R.LLPVEPC(398.2529)DLTEGFD.P	2719	2988	3145	2888	2856	1978
U	R.LLPVEPC(398.2529)DLTEGFD.P	1772	1639	2046	2729	0	1887
U	R.LLPVEPC(398.2529)DLTEGFDPSVPPR.T	3720	2745	1773	4037	2637	1873
U	R.LLPVEPC(398.2529)DLTEGFDPSVPPR.T	5088	3217	4085	3572	3059	3038
U	R.LLPVEPC(398.2529)DLTEGFDPSVPPR.T	5210	4908	7826	7722	4958	5679
U	R.LLPVEPC(398.2529)DLTEGFDPSVPPR.T	12454	11055	12242	10596	9548	13242
U	R.LLPVEPC(398.2529)DLTEGFDPSVPPR.T	34050	28879	26916	29093	28298	28224
U	R.LLPVEPC(398.2529)DLTEGFDPSVPPR.T	12925	13953	12507	11711	10536	12767
U	R.LLPVEPC(398.2529)DLTEGFDPSVPPR.T	26380	24040	25287	24096	21999	24262
U	R.LLPVEPC(398.2529)DLTEGFDPSVPPR.T	9197	9295	10019	9620	6725	8173
U	R.LLPVEPC(398.2529)DLTEGFDPSVPPR.T	6249	5654	5964	6793	5022	3865
U	R.LLPVEPC(398.2529)DLTEGFDPSVPPR.T	4733	6101	4377	5658	4880	5359
U	R.LLPVEPC(398.2529)DLTEGFDPSVPPRTPQEYLR.R	17783	17071	17632	18393	13943	15709
U	R.LLPVEPC(398.2529)DLTEGFDPSVPPRTPQEYLR.R	18495	20162	19840	20707	16407	18216
U	R.LLPVEPC(398.2529)DLTEGFDPSVPPRTPQEYLR.R	11946	9903	12718	11539	11092	11283
U	R.LLPVEPC(398.2529)DLTEGFDPSVPPRTPQEYLR.R	3240	3693	4345	2630	3087	4149
U	R.RVQIEAAQC(398.2529)PDVVVAQIDPK.K	70808	72473	69099	72134	67441	69646
U	R.RVQIEAAQC(398.2529)PDVVVAQIDPK.K	69935	62474	69069	68211	65312	70560
U	R.RVQIEAAQC(398.2529)PDVVVAQIDPK.K	17956	17028	16336	17361	17367	19082
U	R.VQIEAAQC(398.2529)PDVVVAQIDPK.K	1161	0	0	0	0	0
U	R.VQIEAAQC(398.2529)PDVVVAQIDPK.K	143239	138713	129019	140941	123901	122342
U	R.KQSVNISLSGC(398.2529)QPAPEGYSPTLQWQQQQVAQFSTVR.Q	13101	10664	13729	13793	9856	12975
U	K.LC(398.2529)ADGAVGPATNESPGIDYVQIGFPPLLSIVSR.M	12905	12434	13077	11741	12349	10518
Q9BVA1	254	0.411	49953	254	67389.4	60738.8	10995565	TUBB2B Tubulin beta-2B chain [REVIEWED] ENSG00000137285;IPI00031370;Q9BVA1;A8K068
	R.AILVDLEPGTM(15.994915)DSVR.S	35529	38325	37576	13501	21744	48016
U	R.KESESC(398.2529)DCLQGFQLTHSLGGGTGSGM(15.994915)GTLLISK.I	8609	6876	8448	9385	6560	9072
U	R.KESESC(398.2529)DCLQGFQLTHSLGGGTGSGM(15.994915)GTLLISK.I	12589	8722	11727	14161	11833	9961
U	R.KESESCDC(398.2529)LQGFQLTHSLGGGTGSGM(15.994915)GTLLISK.I	9649	11176	9844	8758	10813	12314
U	R.KESESC(398.2529)DCLQGFQLTHSLGGGTGSGM(15.994915)GTLLISK.I	8776	8666	7127	8010	7907	8390
U	R.KESESC(398.2529)DCLQGFQLTHSLGGGTGSGM(15.994915)GTLLISK.I	23086	21386	26080	24161	23765	22069
U	R.KESESC(398.2529)DCLQGFQLTHSLGGGTGSGM(15.994915)GTLLISK.I	15446	14049	15970	17972	17369	18609
U	R.KESESC(398.2529)DCLQGFQLTHSLGGGTGSGM(15.994915)GTLLISK.I	30437	28322	31101	31633	26141	30851
U	R.KESESC(398.2529)DCLQGFQLTHSLGGGTGSGM(15.994915)GTLLISK.I	38447	37826	33267	38874	37045	33999
U	K.ESESCDC(398.2529)LQGFQLTHSLGGGTGSGMGTLLISK.I	7550	5692	6760	6489	6311	7407
U	K.ESESCDC(398.2529)LQGFQLTHSLGGGTGSGMGTLLISK.I	6910	7998	8128	9026	7942	7329
U	K.ESESC(398.2529)DCLQGFQLTHSLGGGTGSGMGTLLISK.I	3469	2900	3973	3663	2644	1628
U	K.ESESCDC(398.2529)LQGFQLTHSLGGGTGSGMGTLLISK.I	5216	4685	4953	5756	6322	5145
U	K.ESESCDC(398.2529)LQGFQLTHSLGGGTGSGMGTLLISK.I	10473	10625	12004	11630	13492	10906
U	K.ESESCDC(398.2529)LQGFQLTHSLGGGTGSGM(15.994915)GTLLISK.I	107246	108041	99513	114629	104697	106885
U	K.ESESCDC(398.2529)LQGFQLTHSLGGGTGSGM(15.994915)GTLLISK.I	108867	99200	87173	93807	98887	100075
U	K.ESESCDC(398.2529)LQGFQLTHSLGGGTGSGM(15.994915)GTLLISK.I	4542	3757	6124	4504	4099	5237
U	K.ESESCDC(398.2529)LQGFQLTHSLGGGTGSGM(15.994915)GTLLISK.I	10068	10232	15036	10261	14217	13182
U	K.ESESCDC(398.2529)LQGFQLTHSLGGGTGSGM(15.994915)GTLLISK.I	14504	16860	16687	15593	17366	16174
U	K.ESESCDC(398.2529)LQGFQLTHSLGGGTGSGM(15.994915)GTLLISK.I	19723	17658	12831	19904	16617	18460
U	K.ESESCDC(398.2529)LQGFQLTHSLGGGTGSGM(15.994915)GTLLISK.I	10909	10954	8321	10473	10200	10179
U	K.ESESCDC(398.2529)LQGFQLTHSLGGGTGSGM(15.994915)GTLLISK.I	67871	64859	61250	75456	59162	63047
U	K.ESESCDC(398.2529)LQGFQLTHSLGGGTGSGM(15.994915)GTLLISK.I	144255	132874	132733	162818	149986	163653
U	K.ESESCDC(398.2529)LQGFQLTHSLGGGTGSGM(15.994915)GTLLISK.I	20632	23151	17987	20696	21129	22585
U	K.ESESCDC(398.2529)LQGFQLTHSLGGGTGSGM(15.994915)GTLLISK.I	38099	40975	37651	44159	41902	37840
U	K.ESESC(398.2529)DCLQGFQLTHSLGGGTGSGM(15.994915)GTLLISK.I	11726	10068	8774	11845	7313	9078
U	K.ESESCDC(398.2529)LQGFQLTHSLGGGTGSGM(15.994915)GTLLISK.I	57972	56215	52659	58307	50662	50137
	K.VSDTVVEPYNATLSVHQLVENTDETYCIDNEALYDIC(398.2529)FR.T	9058	8917	6920	7791	6332	7320
	K.VSDTVVEPYNATLSVHQLVENTDETYCIDNEALYDIC(398.2529)FR.T	2800	1764	0	1827	2473	1628
	K.VSDTVVEPYNATLSVHQLVENTDETYCIDNEALYDIC(398.2529)FR.T	0	0	0	0	0	1496
	K.VSDTVVEPYNATLSVHQLVENTDETYCIDNEALYDIC(398.2529)FR.T	0	1776	0	0	0	0
	K.VSDTVVEPYNATLSVHQLVENTDETYCIDNEALYDIC(398.2529)FR.T	3110	2388	2774	2035	0	2753
	K.VSDTVVEPYNATLSVHQLVENTDETYCIDNEALYDIC(398.2529)FR.T	1388	0	0	1191	0	0
	K.VSDTVVEPYNATLSVHQLVENTDETYCIDNEALYDIC(398.2529)FR.T	0	0	0	0	1340	0
	K.VSDTVVEPYNATLSVHQLVENTDETYCIDNEALYDIC(398.2529)FR.T	4989	5336	5687	4963	4792	4088
	K.VSDTVVEPYNATLSVHQLVENTDETYCIDNEALYDIC(398.2529)FR.T	3775	2453	0	3897	1953	4109
	K.VSDTVVEPYNATLSVHQLVENTDETYCIDNEALYDIC(398.2529)FR.T	2324	2239	2472	2151	1232	1939
	K.VSDTVVEPYNATLSVHQLVENTDETYCIDNEALYDIC(398.2529)FR.T	7644	7225	4845	6747	4384	7351
	K.VSDTVVEPYNATLSVHQLVENTDETYCIDNEALYDIC(398.2529)FR.T	6810	3641	2910	5772	3824	6298
	K.VSDTVVEPYNATLSVHQLVENTDETYCIDNEALYDIC(398.2529)FR.T	0	0	0	1317	0	1276
	H.QLVENTDETYCIDNEALYDIC(398.2529)FR.T	0	0	0	1307	0	2103
	L.VENTDETYCIDNEALYDIC(398.2529)FR.T	1647	1429	2619	3642	1763	3612
	E.NTDETYC(398.2529)IDNEALYDICFR.T	1860	2623	2418	3015	0	3669
	N.TDETYCIDNEALYDIC(398.2529)FR.T	3325	4369	4504	3780	3345	4708
	R.TLKLTTPTYGDLNHLVSATMSGVTTC(398.2529)LR.F	66436	64226	64734	72730	65892	77449
	R.TLKLTTPTYGDLNHLVSATM(15.994915)SGVTTC(398.2529)LR.F	0	0	1568	0	0	0
	R.TLKLTTPTYGDLNHLVSATM(15.994915)SGVTTC(398.2529)LR.F	2791	1268	0	1758	1948	1564
	R.TLKLTTPTYGDLNHLVSATM(15.994915)SGVTTC(398.2529)LR.F	1826	3169	2026	2159	1613	2776
	R.TLKLTTPTYGDLNHLVSATM(15.994915)SGVTTC(398.2529)LR.F	3940	4072	2260	4945	5333	6253
	R.TLKLTTPTYGDLNHLVSATM(15.994915)SGVTTC(398.2529)LR.F	15381	15958	15948	19173	16729	17647
	R.TLKLTTPTYGDLNHLVSATM(15.994915)SGVTTC(398.2529)LR.F	36077	37792	37664	44294	44265	45572
	R.TLKLTTPTYGDLNHLVSATM(15.994915)SGVTTC(398.2529)LR.F	6004	7837	9212	8806	5841	6682
	R.TLKLTTPTYGDLNHLVSATM(15.994915)SGVTTC(398.2529)LR.F	6520	7709	6142	7621	7637	6809
	R.TLKLTTPTYGDLNHLVSATM(15.994915)SGVTTC(398.2529)LR.F	7271	7958	8850	6803	8953	7945
	R.TLKLTTPTYGDLNHLVSATM(15.994915)SGVTTC(398.2529)LR.F	1561	2163	2809	3009	2082	3311
	R.TLKLTTPTYGDLNHLVSATM(15.994915)SGVTTC(398.2529)LR.F	33444	38506	37634	37530	37346	43995
	R.TLKLTTPTYGDLNHLVSATM(15.994915)SGVTTC(398.2529)LR.F	76611	72692	76658	84196	67549	89858
	R.TLKLTTPTYGDLNHLVSATM(15.994915)SGVTTC(398.2529)LR.F	4390	3562	4673	4631	3645	5257
	K.LTTPTYGDLNHLVSATMSGVTTC(398.2529)LR.F	5553	4985	4585	5037	4343	5247
	K.LTTPTYGDLNHLVSATMSGVTTC(398.2529)LR.F	21956	18740	22868	23887	18428	19908
	K.LTTPTYGDLNHLVSATMSGVTTC(398.2529)LR.F	4545	3602	3250	2242	3191	2177
	K.LTTPTYGDLNHLVSATMSGVTTC(398.2529)LR.F	25710	31973	30035	29036	25413	25696
	K.LTTPTYGDLNHLVSATMSGVTTC(398.2529)LR.F	24315	25059	22953	22200	24904	22257
	K.LTTPTYGDLNHLVSATMSGVTTC(398.2529)LR.F	207618	147049	219416	172057	162605	173982
	K.LTTPTYGDLNHLVSATMSGVTTC(398.2529)LR.F	72297	79257	85555	75981	68253	70928
	K.LTTPTYGDLNHLVSATMSGVTTC(398.2529)LR.F	11506	7901	10027	9141	8119	7378
	K.LTTPTYGDLNHLVSATM(15.994915)SGVTTC(398.2529)LR.F	2380	3376	2124	2331	2464	0
	K.LTTPTYGDLNHLVSATM(15.994915)SGVTTC(398.2529)LR.F	3070	3499	2875	3969	3153	2667
	K.LTTPTYGDLNHLVSATM(15.994915)SGVTTC(398.2529)LR.F	2411	1393	1350	1267	0	0
	K.LTTPTYGDLNHLVSATM(15.994915)SGVTTC(398.2529)LR.F	2829	0	1657	0	1048	2289
	K.LTTPTYGDLNHLVSATM(15.994915)SGVTTC(398.2529)LR.F	0	1998	0	2676	1895	2037
	K.LTTPTYGDLNHLVSATM(15.994915)SGVTTC(398.2529)LR.F	2541	3051	2208	3459	2350	0
	K.LTTPTYGDLNHLVSATM(15.994915)SGVTTC(398.2529)LR.F	14102	12716	14041	15224	12378	10553
	K.LTTPTYGDLNHLVSATM(15.994915)SGVTTC(398.2529)LR.F	58673	64891	59017	65207	49491	58734
	K.LTTPTYGDLNHLVSATM(15.994915)SGVTTC(398.2529)LR.F	24397	26468	24205	22617	22997	20906
	K.LTTPTYGDLNHLVSATM(15.994915)SGVTTC(398.2529)LR.F	28029	24734	25456	26475	24231	22659
	K.LTTPTYGDLNHLVSATM(15.994915)SGVTTC(398.2529)LR.F	82740	79512	83370	76870	74701	72229
	K.LTTPTYGDLNHLVSATM(15.994915)SGVTTC(398.2529)LR.F	1424	0	1641	2427	0	0
	K.LTTPTYGDLNHLVSATM(15.994915)SGVTTC(398.2529)LR.F	0	0	1808	0	0	0
	K.LTTPTYGDLNHLVSATM(15.994915)SGVTTC(398.2529)LR.F	0	1363	1892	1215	0	0
	K.LTTPTYGDLNHLVSATM(15.994915)SGVTTC(398.2529)LR.F	2595	1225	0	0	3005	3219
	K.LTTPTYGDLNHLVSATM(15.994915)SGVTTC(398.2529)LR.F	4860	1913	3873	2192	2983	3357
	K.LTTPTYGDLNHLVSATM(15.994915)SGVTTC(398.2529)LR.F	2647	1525	2546	2993	1651	1499
	K.LTTPTYGDLNHLVSATM(15.994915)SGVTTC(398.2529)LR.F	1252	1286	1597	0	0	0
	K.LTTPTYGDLNHLVSATM(15.994915)SGVTTC(398.2529)LR.F	7606	9284	6880	7199	6723	7552
	K.LTTPTYGDLNHLVSATM(15.994915)SGVTTC(398.2529)LR.F	19811	20725	19567	23464	18981	22927
	K.LTTPTYGDLNHLVSATM(15.994915)SGVTTC(398.2529)LR.F	33521	35574	30435	35753	28723	26846
	K.LTTPTYGDLNHLVSATM(15.994915)SGVTTC(398.2529)LR.F	38000	40396	30385	36534	27629	34131
	K.LTTPTYGDLNHLVSATM(15.994915)SGVTTC(398.2529)LR.F	6823	10847	6905	8818	6768	5923
	K.LTTPTYGDLNHLVSATM(15.994915)SGVTTC(398.2529)LR.F	229474	252232	237007	209959	194383	219943
	K.LTTPTYGDLNHLVSATM(15.994915)SGVTTC(398.2529)LR.F	33472	28817	31994	37066	21795	34362
	K.LTTPTYGDLNHLVSATM(15.994915)SGVTTC(398.2529)LR.F	79891	83505	78418	75526	61036	59441
	K.LTTPTYGDLNHLVSATM(15.994915)SGVTTC(398.2529)LR.F	6393	6611	6460	8308	5332	6976
	K.LTTPTYGDLNHLVSATM(15.994915)SGVTTC(398.2529)LR.F	3382	2878	2839	2817	1350	2725
	K.LTTPTYGDLNHLVSATM(15.994915)SGVTTC(398.2529)LR.F	3781	5454	4401	4208	4435	4350
	K.LTTPTYGDLNHLVSATM(15.994915)SGVTTC(398.2529)LR.F	56155	54075	52379	53746	52678	55667
	K.LTTPTYGDLNHLVSATM(15.994915)SGVTTC(398.2529)LR.F	148283	151507	152585	141942	125579	140765
	K.LTTPTYGDLNHLVSATM(15.994915)SGVTTC(398.2529)LR.F	29501	37953	26591	35624	25043	34141
	K.LTTPTYGDLNHLVSATM(15.994915)SGVTTC(398.2529)LR.F	6815	7469	3695	7512	4610	5427
	K.LTTPTYGDLNHLVSATM(15.994915)SGVTTC(398.2529)LR.F	1158	2071	0	1520	3008	1459
	K.LTTPTYGDLNHLVSATM(15.994915)SGVTTC(398.2529)LR.F	1873	3052	2719	1623	1751	1257
	K.LTTPTYGDLNHLVSATMSGVTTC(398.2529)LRFPGQLNADLR.K	13048	16164	12476	14783	12138	18397
	K.LTTPTYGDLNHLVSATMSGVTTC(398.2529)LRFPGQLNADLR.K	8770	10857	8375	10473	8643	14273
	K.LTTPTYGDLNHLVSATM(15.994915)SGVTTC(398.2529)LRFPGQLNADLR.K	1580	1511	4376	2304	1872	4617
	K.LTTPTYGDLNHLVSATM(15.994915)SGVTTC(398.2529)LRFPGQLNADLR.K	17087	18599	17900	19571	15173	22706
	K.LTTPTYGDLNHLVSATM(15.994915)SGVTTC(398.2529)LRFPGQLNADLR.K	15715	17665	13039	18853	14336	23551
	K.LTTPTYGDLNHLVSATMSGVTTC(398.2529)LRFPGQLNADLRK.L	14782	18030	18634	20130	16282	24713
	K.LTTPTYGDLNHLVSATM(15.994915)SGVTTC(398.2529)LRFPGQLNADLRK.L	19778	21057	18962	28356	24171	29429
	K.LTTPTYGDLNHLVSATM(15.994915)SGVTTC(398.2529)LRFPGQLNADLRK.L	15609	18645	18316	23157	18502	26322
	K.NMMAAC(398.2529)DPR.H	75413	87447	84197	76342	81130	76955
	K.NM(15.994915)MAAC(398.2529)DPR.H	259015	267894	279551	259492	262231	246322
	K.NM(15.994915)MAAC(398.2529)DPR.H	64647	63332	70116	67902	68907	66249
	K.NMM(15.994915)AAC(398.2529)DPR.H	137894	138662	140796	139523	132725	125478
	K.NMM(15.994915)AAC(398.2529)DPR.H	33227	33508	39965	34829	36909	36537
	K.NM(15.994915)MAAC(398.2529)DPR.H	49037	46834	44589	45307	41141	43455
	K.EVDEQM(15.994915)LNVQNK.N	2291	1864	1398	1613	0	1518
	K.TAVC(398.2529)DIPPR.G	11438	12002	13797	13869	11025	12484
	K.TAVC(398.2529)DIPPR.G	51803	50729	49613	52083	42632	47352
	K.TAVC(398.2529)DIPPR.G	72666	74294	69981	72362	64571	66950
	K.TAVC(398.2529)DIPPR.G	119427	116953	118998	114010	108715	106541
	K.TAVC(398.2529)DIPPR.G	124659	137390	122694	126263	122654	117249
	K.TAVC(398.2529)DIPPR.G	78685	85485	79036	77964	70656	68659
	K.TAVC(398.2529)DIPPR.G	50660	56825	44434	51467	42580	50227
	K.TAVC(398.2529)DIPPR.G	58189	61263	54870	56531	46768	53067
	K.TAVC(398.2529)DIPPR.G	44963	48332	49696	43286	44047	45976
	K.TAVC(398.2529)DIPPR.G	36817	41817	41530	37048	35039	36315
	K.TAVC(398.2529)DIPPR.G	35022	39549	36153	36178	34167	30923
	K.TAVC(398.2529)DIPPR.G	24873	27276	23019	26429	24235	18385
	K.TAVC(398.2529)DIPPR.G	20549	22664	19934	17625	15803	19295
	K.TAVC(398.2529)DIPPR.G	46156	52919	45450	47522	40806	43333
	K.TAVC(398.2529)DIPPR.G	212611	232110	225370	209824	196570	198969
	K.TAVC(398.2529)DIPPR.G	254383	252192	247769	244579	238143	226252
	K.TAVC(398.2529)DIPPR.G	310382	329303	332921	301245	301592	288462
	K.TAVC(398.2529)DIPPR.G	396048	415793	407608	402808	388870	372368
	K.TAVC(398.2529)DIPPR.G	454351	494030	475605	431757	440776	414304
	K.TAVC(398.2529)DIPPR.G	312454	314597	300728	311734	278829	284597
	K.TAVC(398.2529)DIPPR.G	401882	383468	396670	394296	358366	356920
	K.TAVC(398.2529)DIPPR.G	375363	384582	363781	363212	333819	357973
	K.TAVC(398.2529)DIPPR.G	302986	292939	321307	304270	294902	269677
	K.TAVC(398.2529)DIPPR.G	185114	195514	195823	167558	174386	164137
	K.TAVC(398.2529)DIPPR.G	180973	168620	170864	169066	158406	148721
	K.TAVC(398.2529)DIPPR.G	150448	151413	143495	143663	143340	119865
	K.TAVC(398.2529)DIPPR.G	110352	122882	116719	114950	106142	105557
	K.TAVC(398.2529)DIPPR.G	87509	94460	87576	83259	75006	76843
	K.TAVC(398.2529)DIPPR.G	76423	77452	84584	75799	74855	76820
	K.TAVC(398.2529)DIPPR.G	70615	77739	73312	75886	68946	69879
	K.TAVC(398.2529)DIPPR.G	28414	24341	24803	25522	21467	24308
	K.TAVC(398.2529)DIPPR.G	33719	35222	31276	33680	32533	32261
	K.TAVC(398.2529)DIPPR.G	112375	124911	120947	121981	111360	119617
	K.TAVC(398.2529)DIPPR.G	180930	177924	189347	174912	175194	169548
	K.TAVC(398.2529)DIPPR.G	154345	140646	151751	142100	143624	145964
	K.TAVC(398.2529)DIPPR.G	144917	160028	163114	154447	134988	132029
	K.TAVC(398.2529)DIPPR.G	138647	134811	138392	122560	129254	120984
	K.TAVC(398.2529)DIPPR.G	135720	142661	144750	141413	141953	131679
	K.TAVC(398.2529)DIPPR.G	89259	88968	91848	77096	81276	77384
	K.TAVC(398.2529)DIPPR.G	81556	87496	79562	78879	78205	69705
	K.TAVC(398.2529)DIPPR.G	58838	59878	64777	59208	56077	53559
	K.TAVC(398.2529)DIPPR.G	50805	58377	48003	47163	48900	41491
	K.TAVC(398.2529)DIPPR.G	44909	44511	46188	44048	43339	43758
	K.TAVC(398.2529)DIPPR.G	30637	26900	31762	23117	25140	23305
	K.TAVC(398.2529)DIPPR.G	17191	16175	22303	16126	19555	16507
	K.TAVC(398.2529)DIPPR.G	3987	2728	2934	2420	1771	2453
	K.TAVC(398.2529)DIPPR.G	5228	4847	6712	4449	5633	4316
	K.TAVC(398.2529)DIPPR.G	5238	4042	4930	3906	4836	2779
	K.TAVC(398.2529)DIPPR.G	5842	6419	5810	5643	5572	4383
	K.TAVC(398.2529)DIPPR.G	5770	4969	6622	4568	4694	4060
	K.TAVC(398.2529)DIPPR.G	81160	77806	71100	72458	68829	65044
	K.TAVC(398.2529)DIPPR.G	357509	376851	314376	327810	304157	295046
	K.TAVC(398.2529)DIPPR.G	182650	192548	181200	196602	170429	163584
	K.TAVC(398.2529)DIPPR.G	20494	23729	20566	16849	18429	20161
	K.TAVC(398.2529)DIPPR.G	45662	45108	47035	42672	39023	43372
	K.TAVC(398.2529)DIPPR.G	264188	271487	246207	251981	248638	236243
	K.TAVC(398.2529)DIPPR.G	107776	110300	105776	103397	103017	92429
	K.TAVC(398.2529)DIPPR.G	53234	55551	53893	54330	48528	55254
	K.TAVC(398.2529)DIPPR.G	63691	61075	64377	54139	54379	54689
	K.TAVC(398.2529)DIPPR.G	347626	358040	381010	358349	359226	337286
	K.TAVC(398.2529)DIPPRGLK.M	31016	36004	35840	36249	36069	48818
	K.TAVC(398.2529)DIPPRGLK.M	84260	89962	92262	91365	86522	116908
	K.TAVC(398.2529)DIPPRGLK.M	50772	59373	53781	60699	58452	76253
	K.TAVC(398.2529)DIPPRGLK.M	59300	79136	78598	78731	75082	106824
	K.TAVC(398.2529)DIPPRGLK.M	61369	69373	78855	71867	68068	86198
	K.TAVC(398.2529)DIPPRGLK.M	26109	26496	23736	26414	24496	32302
	K.TAVC(398.2529)DIPPRGLK.M	25336	25487	22494	27593	26701	29665
	K.TAVC(398.2529)DIPPRGLK.M	40592	36808	41977	45043	48366	65975
	K.TAVC(398.2529)DIPPRGLK.M	49493	56880	55282	58692	66805	64436
	K.TAVC(398.2529)DIPPRGLK.M	54947	60515	58687	63793	64511	91410
	K.TAVC(398.2529)DIPPRGLK.M	62242	61231	70360	67916	70072	88452
	K.TAVC(398.2529)DIPPRGLK.M	62776	65230	65214	73698	66316	88593
	K.TAVC(398.2529)DIPPRGLK.M	45868	61806	51800	56152	53263	78006
	K.TAVC(398.2529)DIPPRGLK.M	63983	67788	73019	71644	77530	86599
	K.TAVC(398.2529)DIPPRGLK.M	35137	40019	37123	37489	41264	47137
	K.TAVC(398.2529)DIPPRGLK.M	202658	227151	227916	250813	226653	308494
	K.TAVC(398.2529)DIPPRGLK.M	71757	81797	84031	88886	84706	115118
P10768	66	0.411	31463	66	12610	11365.2	400866	ESD S-formylglutathione hydrolase [REVIEWED] ENSG00000139684;IPI00411706;P10768;Q5TBU8;Q5TBV0;Q5TBV2;Q9BVJ2
U	K.AETGKCPALYWLSGLTC(398.2529)TEQNFISK.S	0	0	0	909	0	0
U	K.AETGKCPALYWLSGLTC(398.2529)TEQNFISK.S	0	1687	0	0	1750	0
U	K.AETGKCPALYWLSGLTC(398.2529)TEQNFISK.S	1439	1887	1903	1265	0	0
U	K.AETGKCPALYWLSGLTC(398.2529)TEQNFISK.S	0	0	0	0	0	1354
U	K.AETGKCPALYWLSGLTC(398.2529)TEQNFISK.S	0	1266	0	2400	0	0
U	K.AETGKCPALYWLSGLTC(398.2529)TEQNFISK.S	28181	25928	27282	27129	25752	20439
U	K.AETGKCPALYWLSGLTC(398.2529)TEQNFISK.S	10650	11940	11477	11929	11490	10503
U	K.AETGKCPALYWLSGLTC(398.2529)TEQNFISK.S	8845	9926	8943	11002	11056	8983
U	K.AETGKC(398.2529)PALYWLSGLTCTEQNFISK.S	4882	2071	1744	3931	3985	2762
U	K.AETGKC(398.2529)PALYWLSGLTCTEQNFISK.S	10990	7423	11266	6958	9103	8288
U	K.AETGKCPALYWLSGLTC(398.2529)TEQNFISK.S	20967	21145	24202	24531	23343	22681
U	K.AETGKCPALYWLSGLTC(398.2529)TEQNFISK.S	85753	77084	79228	84548	78292	70658
U	K.AETGKCPALYWLSGLTC(398.2529)TEQNFISK.S	16902	16854	17184	17622	14668	12725
U	K.AETGKC(398.2529)PALYWLSGLTC(398.2529)TEQNFISK.S	1633	1696	0	1457	1327	1970
U	K.CPALYWLSGLTC(398.2529)TEQNFISK.S	959	0	0	0	0	0
U	K.CPALYWLSGLTC(398.2529)TEQNFISK.S	2585	1804	0	1802	1711	1237
U	K.CPALYWLSGLTC(398.2529)TEQNFISK.S	6594	4987	4683	5793	3765	3406
U	K.CPALYWLSGLTC(398.2529)TEQNFISK.S	7206	6245	9015	6681	8137	6615
U	K.CPALYWLSGLTC(398.2529)TEQNFISK.S	10755	13040	11677	10868	12405	11135
U	K.CPALYWLSGLTC(398.2529)TEQNFISK.S	4089	3915	6521	3904	3414	3996
U	K.CPALYWLSGLTC(398.2529)TEQNFISK.S	1994	2435	1710	2424	1706	2418
U	K.C(398.2529)PALYWLSGLTCTEQNFISK.S	1232	0	0	0	0	0
U	K.C(398.2529)PALYWLSGLTCTEQNFISK.S	3135	1668	3893	2143	3186	0
U	K.C(398.2529)PALYWLSGLTCTEQNFISK.S	13040	9844	13269	13053	17497	11115
U	K.C(398.2529)PALYWLSGLTCTEQNFISK.S	3113	3530	3730	2248	4484	3399
U	K.C(398.2529)PALYWLSGLTC(398.2529)TEQNFISK.S	0	0	0	0	1773	0
U	R.GC(398.2529)NIKGEDESWDFGTGAGFYVDATEDPWK.T	0	1292	0	0	0	0
U	R.GC(398.2529)NIKGEDESWDFGTGAGFYVDATEDPWK.T	7608	7039	8110	7578	6141	7903
U	R.GC(398.2529)NIKGEDESWDFGTGAGFYVDATEDPWKTNYR.M	5206	7728	7112	4990	5560	5711
U	K.SVSAFAPICNPVLC(398.2529)PWGK.K	10247	11151	12874	12644	12210	9629
U	K.SVSAFAPICNPVLC(398.2529)PWGK.K	79297	76094	82895	80797	76815	71474
U	K.SVSAFAPIC(398.2529)NPVLCPWGK.K	46973	55547	57633	47324	50424	46218
U	K.SVSAFAPIC(398.2529)NPVLCPWGK.K	15554	18241	17655	14805	16546	19197
U	K.SVSAFAPICNPVLC(398.2529)PWGK.K	23373	22105	24963	24222	22149	19804
U	K.SVSAFAPICNPVLC(398.2529)PWGKK.A	0	1312	1745	0	1270	0
U	K.SVSAFAPICNPVLC(398.2529)PWGKK.A	3260	3398	3871	4220	3923	3500
U	K.SVSAFAPICNPVLC(398.2529)PWGKK.A	2149	4969	5640	2939	4189	4181
U	K.SVSAFAPICNPVLC(398.2529)PWGKK.A	4632	4161	5817	5581	5214	5445
U	K.SYPGSQLDILIDQGKDDQFLLDGQLLPDNFIAAC(398.2529)TEK.K	0	0	1670	0	0	0
P04075	25	0.404	39420	25	219052	197435	3794319	ALDOA Fructose-bisphosphate aldolase A [REVIEWED] ENSG00000149925;IPI00465439;P04075;B4DXI7;Q6FH76;Q6FI10;Q96B15;Q9BWD9;Q9UCN2
U	R.QLLLTADDRVNPC(398.2529)IGGVILFHETLYQK.A	46553	38024	39170	36175	43795	32531
U	R.VNPC(398.2529)IGGVILFHETLYQK.A	4049	3826	3516	3259	4494	3123
U	R.VNPC(398.2529)IGGVILFHETLYQK.A	29961	23387	24156	21678	25653	21317
	R.YASIC(398.2529)QQNGIVPIVEPEILPDGDHDLKR.C	6110	3667	5329	4747	4373	4189
	R.YASIC(398.2529)QQNGIVPIVEPEILPDGDHDLKR.C	78784	77830	71691	77579	82154	70611
	R.C(398.2529)QYVTEK.V	7462	7930	6942	7241	7921	7342
	R.C(398.2529)QYVTEK.V	88518	90467	100840	75353	96800	86765
	R.C(398.2529)QYVTEK.V	387244	369429	388527	331194	417429	320373
	R.C(398.2529)QYVTEK.V	820948	822968	882433	642472	820300	643314
U	K.ALSDHHIYLEGTLLKPNM(15.994915)VTPGHAC(398.2529)TQK.F	77969	78347	62159	86935	85357	57452
U	R.TVPPAVTGITFLSGGQSEEEASINLNAINKC(398.2529)PLLKPWALTFSYGR.A	9142	6223	6728	6846	10290	6123
U	K.C(398.2529)PLLKPWALTFSYGR.A	5153	6412	5743	5210	6228	5316
U	K.RALANSLAC(398.2529)QGK.Y	26378	27276	29463	26310	25340	29274
U	K.RALANSLAC(398.2529)QGK.Y	8517	9896	8007	5871	9825	7463
U	K.RALANSLAC(398.2529)QGK.Y	270548	290112	260611	271272	261422	264651
U	R.ALANSLAC(398.2529)QGK.Y	38077	41307	38868	38082	37511	35648
U	R.ALANSLAC(398.2529)QGK.Y	2504	0	2785	2189	1990	2421
U	R.ALANSLAC(398.2529)QGK.Y	7511	8243	7689	7797	7518	7561
U	R.ALANSLAC(398.2529)QGK.Y	935644	951366	1016566	812967	907889	838220
U	R.ALANSLAC(398.2529)QGK.Y	1275874	1283061	1292397	1186401	1253495	1171345
U	R.ALANSLAC(398.2529)QGK.Y	19193	19532	18584	18364	19886	21664
P17509	10	0.402	25432	10	19310.7	17404.6	154029	HOXB6 Homeobox protein Hox-B6 [REVIEWED] ENSG00000108511;IPI00216597;P17509;A8K835;D3DTV5;P09068;Q9HB11;Q9UGH2
U	R.AAPC(398.2529)DYGPAPAFYR.E	10731	12995	15046	13265	12715	13855
U	R.AAPC(398.2529)DYGPAPAFYR.E	26935	27073	25956	28039	26907	28778
U	R.AAPC(398.2529)DYGPAPAFYR.E	24236	21247	23406	24173	26926	28363
U	K.ESAC(398.2529)ALSGADEQPPFHPEPR.K	10610	11184	12122	9733	9272	10130
U	K.ESAC(398.2529)ALSGADEQPPFHPEPR.K	2538	2200	3005	3049	2402	2514
U	R.KSDC(398.2529)AQDKSVFGETEEQK.C	11817	11394	11486	12659	10889	10733
U	R.KSDC(398.2529)AQDKSVFGETEEQK.C	10214	10007	11521	10797	9089	9436
U	K.SVFGETEEQKC(398.2529)STPVYPWM(15.994915)QR.M	14367	11468	14559	16180	11023	10839
U	R.M(15.994915)NSC(398.2529)NSSSFGPSGR.R	31222	31791	31588	34793	29240	35987
	R.RIEIAHALC(398.2529)LTER.Q	31376	29482	30288	34949	35572	25324
Q9NPF0	9	0.397	28991	9	18397.4	16581.5	112266	CD320 CD320 antigen [REVIEWED] ENSG00000167775;IPI00641251;Q9NPF0;B2RDS5;D6W668;Q53HF7
U	A.AASPLSTPTSAQAAGPSSGSCPPTKFQC(398.2529)R.T	9003	6368	11592	10063	8436	11613
U	R.TSGLC(398.2529)VPLTWR.C	15771	13722	15208	14998	12656	13645
U	R.TSGLC(398.2529)VPLTWR.C	18693	17648	19934	16106	19736	17084
U	R.CDRDLDC(398.2529)SDGSDEEECRIEPCTQK.G	0	0	0	0	0	1511
U	K.GQCPPPPGLPC(398.2529)PCTGVSDCSGGTDKK.L	39278	35221	37475	43258	43090	38676
U	R.LAC(398.2529)LAGELR.C	24069	24136	19887	18932	21566	23545
U	R.C(398.2529)TLSDDCIPLTWR.C	5429	5747	5967	6092	6501	6301
U	R.CTLSDDC(398.2529)IPLTWR.C	20409	20220	21403	20755	24785	22837
Q96CP2	8	0.393	14564	8	30329.7	27336.1	158226	FLYWCH2 FLYWCH family member 2 [REVIEWED] ENSG00000162076;IPI00060521;Q96CP2
U	R.KGVHC(398.2529)VMSLGVPGPATLAK.A	12466	9580	8040	10780	11815	9084
U	R.KGVHC(398.2529)VM(15.994915)SLGVPGPATLAK.A	7235	3458	5456	6216	4867	5677
U	R.KGVHC(398.2529)VM(15.994915)SLGVPGPATLAK.A	0	0	1363	0	0	0
U	K.GVHC(398.2529)VMSLGVPGPATLAK.A	37293	33317	34065	34729	29996	33755
U	K.GVHC(398.2529)VM(15.994915)SLGVPGPATLAK.A	56602	51392	52236	53196	53342	55265
U	R.SRQDPGTDRTEDSGLAAGPPEAAGENFAPC(398.2529)SVAPGK.S	6697	7716	8284	8187	6457	10471
U	R.QDPGTDRTEDSGLAAGPPEAAGENFAPC(398.2529)SVAPGK.S	71060	67980	67383	72440	61172	64872
Q9BY32	20	0.392	21446	20	33633.8	30314.5	528568	ITPA Inosine triphosphate pyrophosphatase [REVIEWED] ENSG00000125877;IPI00375446;Q9BY32;A4UIM5;B2BCH7;O14878;Q5JWH4;Q9BYN1;Q9BYX0;Q9H3H8
U	K.KLEEVVQILGDKFPC(398.2529)TLVAQK.I	19587	16930	15877	18071	20417	12409
U	K.KLEEVVQILGDKFPC(398.2529)TLVAQK.I	9917	5767	5959	7557	7795	5866
U	K.LEEVVQILGDKFPC(398.2529)TLVAQK.I	8861	9252	6656	6884	8613	7141
U	R.QVQGPVLVEDTCLC(398.2529)FNALGGLPGPYIK.W	3858	4224	5312	3759	3085	3048
U	R.QVQGPVLVEDTC(398.2529)LCFNALGGLPGPYIK.W	12127	11787	9517	11191	7725	7787
U	R.GC(398.2529)QDFGWDPCFQPDGYEQTYAEMPK.A	0	1565	0	0	0	0
U	R.GC(398.2529)QDFGWDPCFQPDGYEQTYAEMPK.A	8491	5662	6678	7887	6928	5370
U	R.GC(398.2529)QDFGWDPCFQPDGYEQTYAEMPK.A	23153	24362	20179	24569	18845	22991
U	R.GC(398.2529)QDFGWDPCFQPDGYEQTYAEM(15.994915)PK.A	4033	4408	4772	5515	2915	5442
U	R.GC(398.2529)QDFGWDPCFQPDGYEQTYAEM(15.994915)PK.A	14886	14238	13664	17149	15395	13651
U	R.GC(398.2529)QDFGWDPCFQPDGYEQTYAEM(15.994915)PK.A	1405	0	0	0	1168	1171
U	R.GC(398.2529)QDFGWDPCFQPDGYEQTYAEM(15.994915)PK.A	2908	1262	0	1847	2784	1393
U	R.GC(398.2529)QDFGWDPCFQPDGYEQTYAEM(15.994915)PK.A	37014	40863	36286	34606	35774	34806
U	R.GC(398.2529)QDFGWDPCFQPDGYEQTYAEM(15.994915)PK.A	7594	4257	6092	6363	6249	6057
U	R.GC(398.2529)QDFGWDPCFQPDGYEQTYAEM(15.994915)PK.A	34287	27763	36712	31578	31549	30405
U	R.GC(398.2529)QDFGWDPCFQPDGYEQTYAEMPKAEK.N	47849	49053	49661	54850	46718	47952
U	R.GC(398.2529)QDFGWDPCFQPDGYEQTYAEMPKAEK.N	28522	22134	29661	25994	26430	30063
U	R.GC(398.2529)QDFGWDPCFQPDGYEQTYAEM(15.994915)PKAEK.N	9663	13098	11783	13843	13605	11703
U	R.GC(398.2529)QDFGWDPCFQPDGYEQTYAEM(15.994915)PKAEK.N	61581	65712	61052	66072	61148	66651
U	R.GC(398.2529)QDFGWDPCFQPDGYEQTYAEM(15.994915)PKAEK.N	270553	257065	273005	280466	261290	283134
P21964	19	0.391	30037	19	54146.7	48802.9	805524	COMT Catechol O-methyltransferase [REVIEWED] ENSG00000093010;IPI00375513;P21964;A8MPV9;Q6IB07;Q6ICE6
U	K.IVDAVIQEHQPSVLLELGAYC(398.2529)GYSAVR.M	0	0	0	0	0	1355
U	K.IVDAVIQEHQPSVLLELGAYC(398.2529)GYSAVR.M	19849	18304	17035	18477	17146	14502
U	R.LITIEINPDC(398.2529)AAITQR.M	14872	15288	10876	13165	13719	10444
U	R.LITIEINPDC(398.2529)AAITQR.M	1817	0	0	1286	3288	1431
U	R.YLPDTLLLEEC(398.2529)GLLR.K	13578	10319	10809	11131	11912	10826
U	R.YLPDTLLLEEC(398.2529)GLLR.K	4436	4737	6053	4761	4566	3534
U	R.KGTVLLADNVIC(398.2529)PGAPDFLAHVR.G	0	1977	0	0	1223	0
U	R.KGTVLLADNVIC(398.2529)PGAPDFLAHVR.G	47965	44835	39824	44756	44267	38499
U	R.KGTVLLADNVIC(398.2529)PGAPDFLAHVR.G	415670	388422	367551	363755	361521	336581
U	R.KGTVLLADNVIC(398.2529)PGAPDFLAHVR.G	51504	61690	58002	61437	49548	53228
U	K.GTVLLADNVIC(398.2529)PGAPDFLAHVR.G	9821	9149	9322	7508	9471	7429
U	K.GTVLLADNVIC(398.2529)PGAPDFLAHVR.G	27824	26142	24310	23147	25457	26106
U	R.GSSC(398.2529)FECTHYQSFLEYR.E	3334	3183	4076	2874	2153	2763
U	R.GSSCFEC(398.2529)THYQSFLEYR.E	3073	4669	4485	4025	2588	2672
U	R.GSSC(398.2529)FECTHYQSFLEYR.E	19779	21884	18166	21595	22716	19163
U	R.GSSC(398.2529)FECTHYQSFLEYR.E	2246	0	0	0	1263	0
U	R.GSSC(398.2529)FECTHYQSFLEYR.E	175627	189967	160783	172084	135928	165704
U	R.GSSC(398.2529)FECTHYQSFLEYREVVDGLEK.A	67058	82438	78284	90079	80217	88034
Q9Y617	15	0.386	40423	15	28729.9	25894.4	231458	PSAT1 Phosphoserine aminotransferase [REVIEWED] ENSG00000135069;IPI00219478;Q9Y617;Q5T7G5;Q5T7G6;Q96AW2;Q9BQ12
U	K.VIFLQGGGC(398.2529)GQFSAVPLNLIGLK.A	0	0	1530	0	0	0
U	K.VIFLQGGGC(398.2529)GQFSAVPLNLIGLK.A	0	0	1431	0	0	0
U	R.C(398.2529)ADYVVTGAWSAK.A	102368	112038	116863	95764	113825	96783
U	R.EC(398.2529)PSVLEYK.V	28204	26607	28752	28958	28294	24956
U	R.EC(398.2529)PSVLEYK.V	106050	92933	105798	95792	100195	85789
U	K.SQTIYEIIDNSQGFYVC(398.2529)PVEPQNR.S	0	1489	0	2165	0	1927
U	K.SQTIYEIIDNSQGFYVC(398.2529)PVEPQNR.S	1698	2445	0	1491	1338	2200
U	K.SQTIYEIIDNSQGFYVC(398.2529)PVEPQNR.S	8372	8228	11708	8080	10569	7579
U	K.SQTIYEIIDNSQGFYVC(398.2529)PVEPQNR.S	11111	8716	12218	8400	11123	6186
U	K.SQTIYEIIDNSQGFYVC(398.2529)PVEPQNR.S	1141	1262	1369	0	1080	1386
Q15366	54	0.384	38580	54	54946.1	49523.4	1927135	PCBP2 Poly(rC)-binding protein 2 [REVIEWED] ENSG00000197111;IPI00796337;Q15366;A8K7X6;F8VYL7;Q32Q82;Q68Y55;Q6IPF4;Q6PKG5
	R.INISEGNC(398.2529)PER.I	156875	160088	157168	159561	165265	179226
	R.INISEGNC(398.2529)PER.I	55888	57190	49268	52021	56137	52096
	R.INISEGNC(398.2529)PER.I	1736	1348	0	2068	2049	0
	R.INISEGNC(398.2529)PER.I	35584	28188	28757	29268	27563	31228
	R.INISEGNC(398.2529)PER.I	96998	93297	88498	85988	84226	95882
	R.INISEGNC(398.2529)PER.I	6936	5949	6469	6716	6539	5845
	R.INISEGNC(398.2529)PER.I	2305	1461	2407	1180	2165	1363
	R.INISEGNC(398.2529)PER.I	6128	5614	6061	5917	6092	7503
	R.INISEGNC(398.2529)PER.I	5324	5224	6214	5358	4214	5581
	R.INISEGNC(398.2529)PER.I	0	2334	1893	0	0	1400
	R.INISEGNC(398.2529)PER.I	487786	443800	419496	430016	407331	410104
	R.INISEGNC(398.2529)PER.I	81658	84664	77193	84439	77121	86744
	R.INISEGNC(398.2529)PER.I	16707	20421	18584	20475	17627	18318
	R.INISEGNC(398.2529)PER.I	504665	508266	585173	564800	580156	587579
	R.INISEGNC(398.2529)PER.I	19106	17734	16277	15982	15966	17813
	R.LVVPASQC(398.2529)GSLIGK.G	18831	21087	15108	18529	15804	15808
	R.LVVPASQC(398.2529)GSLIGK.G	18658	11986	17648	14965	14696	18064
	R.LVVPASQC(398.2529)GSLIGK.G	3246	1959	2465	2153	2210	2560
	R.LVVPASQC(398.2529)GSLIGK.G	2837	2486	3108	3971	2586	3435
	R.LVVPASQC(398.2529)GSLIGK.G	1099	0	2645	0	1716	2048
	R.LVVPASQC(398.2529)GSLIGK.G	0	0	1819	0	0	0
	R.LVVPASQC(398.2529)GSLIGK.G	6040	6447	5462	6811	5033	6674
	R.LVVPASQC(398.2529)GSLIGK.G	265790	252037	231841	240896	239552	238999
	R.LVVPASQC(398.2529)GSLIGK.G	28671	28336	29650	26808	27014	32290
	R.LVVPASQC(398.2529)GSLIGK.G	32771	27950	21575	33258	31204	28133
	R.LVVPASQC(398.2529)GSLIGK.G	41865	40344	42123	41232	45608	41689
U	R.LVVPASQCGSLIGKGGC(398.2529)K.I	13353	17730	11723	21880	14767	43033
U	R.LVVPASQCGSLIGKGGC(398.2529)K.I	21259	23129	25316	30770	28318	67359
	R.ESTGAQVQVAGDM(15.994915)LPNSTER.A	3387	3673	2707	0	2417	5255
U	R.AITIAGIPQSIIEC(398.2529)VK.Q	28716	28826	31197	26994	25938	25439
U	R.AITIAGIPQSIIEC(398.2529)VK.Q	13612	11802	14485	11201	13267	10203
U	R.AITIAGIPQSIIEC(398.2529)VK.Q	71561	66932	71636	68415	65043	62389
U	R.YSTGSDSASFPHTTPSMC(398.2529)LNPDLEGPPLEAYTIQGQY.A	2740	1970	1476	1359	1632	2533
U	R.YSTGSDSASFPHTTPSM(15.994915)C(398.2529)LNPDLEGPPLEAYTIQGQY.A	1899	0	2237	0	0	1849
U	R.YSTGSDSASFPHTTPSM(15.994915)C(398.2529)LNPDLEGPPLEAYTIQGQY.A	9507	8480	5209	9127	3968	6780
U	R.YSTGSDSASFPHTTPSMC(398.2529)LNPDLEGPPLEAYTIQGQYAIPQPDLTK.L	2913	5296	2224	3179	2102	3415
U	R.YSTGSDSASFPHTTPSMC(398.2529)LNPDLEGPPLEAYTIQGQYAIPQPDLTK.L	5238	5201	5200	4225	4246	4709
U	R.YSTGSDSASFPHTTPSM(15.994915)C(398.2529)LNPDLEGPPLEAYTIQGQYAIPQPDLTK.L	3162	3909	3967	2833	3051	3188
U	R.YSTGSDSASFPHTTPSM(15.994915)C(398.2529)LNPDLEGPPLEAYTIQGQYAIPQPDLTK.L	11872	15659	10607	13364	8968	13194
U	K.GYWGLDASAQTTSHELTIPNDLIGC(398.2529)IIGR.Q	4398	4896	4272	5515	4103	5036
U	K.GYWGLDASAQTTSHELTIPNDLIGC(398.2529)IIGR.Q	53053	54227	48200	50905	50546	52455
U	K.GYWGLDASAQTTSHELTIPNDLIGC(398.2529)IIGR.Q	15001	13131	13735	15440	15013	14445
U	K.GYWGLDASAQTTSHELTIPNDLIGC(398.2529)IIGR.Q	1269	0	0	1520	0	1736
U	D.ASAQTTSHELTIPNDLIGC(398.2529)IIGR.Q	18587	19425	19562	18909	15566	18386
P27695	11	0.384	35554	11	33119.6	29850.7	277356	APEX1 DNA-(apurinic or apyrimidinic site) lyase [REVIEWED] ENSG00000100823;IPI00215911;P27695;Q969L5;Q99775
U	K.IC(398.2529)SWNVDGLR.A	20651	18732	19051	18652	22176	20155
U	K.IC(398.2529)SWNVDGLR.A	41498	40770	46001	44385	42290	44351
U	K.IC(398.2529)SWNVDGLR.A	81348	77151	77777	63780	83858	69212
U	K.GLDWVKEEAPDILC(398.2529)LQETK.C	2349	1188	0	1466	0	0
U	K.C(398.2529)SENKLPAELQELPGLSHQYWSAPSDKEGYSGVGLLSR.Q	44098	45212	45143	46232	53151	44908
U	R.KPLVLC(398.2529)GDLNVAHEEIDLRNPK.G	75391	64866	63705	65457	79158	61907
U	R.LDYFLLSHSLLPALC(398.2529)DSK.I	27075	20189	20129	20084	18804	16965
U	R.LDYFLLSHSLLPALC(398.2529)DSK.I	3738	4207	2493	2795	4797	4546
U	K.ALGSDHC(398.2529)PITLYLAL.-	5652	5735	5278	6695	6764	3495
U	K.ALGSDHC(398.2529)PITLYLAL.-	15114	14091	14752	14260	17278	11971
U	K.ALGSDHC(398.2529)PITLYLAL.-	11444	11890	8316	10372	12191	8728
P67775	17	0.382	35594	17	15244.7	13739.9	182272	PPP2CA Serine/threonine-protein phosphatase 2A catalytic subunit alpha isoform [REVIEWED] ENSG00000113575;IPI00008380;P67775;P05323;P13197
U	K.ELDQWIEQLNEC(398.2529)K.Q	7050	6445	5993	8642	9113	4252
U	K.ELDQWIEQLNEC(398.2529)K.Q	35012	33314	29548	34153	35312	30497
	R.C(398.2529)PVTVCGDVHGQFHDLMELFR.I	8877	6737	4519	8017	7996	5829
	R.C(398.2529)PVTVCGDVHGQFHDLM(15.994915)ELFR.I	4023	2799	5540	3099	4166	3154
	R.C(398.2529)PVTVCGDVHGQFHDLM(15.994915)ELFR.I	22802	18602	21638	18530	22583	23806
	R.C(398.2529)PVTVCGDVHGQFHDLM(15.994915)ELFR.I	19799	19954	21665	20519	20470	20076
	R.C(398.2529)PVTVCGDVHGQFHDLM(15.994915)ELFR.I	35502	29817	33431	28380	35188	26738
	R.QITQVYGFYDEC(398.2529)LR.K	19337	20494	17068	18959	19166	19775
	R.QITQVYGFYDEC(398.2529)LRK.Y	29850	36421	32863	31031	32096	31173
	R.LQEVPHEGPM(15.994915)C(398.2529)DLLWSDPDDRGGWGISPR.G	9583	7204	12040	7052	7896	8313
	R.NVVTIFSAPNYC(398.2529)YR.C	3891	6079	6127	5897	6172	4558
	R.NVVTIFSAPNYC(398.2529)YR.C	5630	7079	8023	6322	5358	5650
	R.NVVTIFSAPNYC(398.2529)YR.C	0	0	0	0	2262	1363
	R.C(398.2529)GNQAAIM(15.994915)ELDDTLKYSFLQFDPAPR.R	2398	1369	1714	2371	1648	2104
	R.C(398.2529)GNQAAIM(15.994915)ELDDTLKYSFLQFDPAPR.R	2344	3486	1883	1967	2664	1979
P62714	16	0.382	35575	16	13649.9	12302.4	152083	PPP2CB Serine/threonine-protein phosphatase 2A catalytic subunit beta isoform [REVIEWED] ENSG00000104695;IPI00429689;P62714;D3DSV4;P11082;Q6FHK5
U	K.ELDQWVEQLNEC(398.2529)K.Q	8198	6667	8062	6643	6390	5188
	R.C(398.2529)PVTVCGDVHGQFHDLMELFR.I	8877	6737	4519	8017	7996	5829
	R.C(398.2529)PVTVCGDVHGQFHDLM(15.994915)ELFR.I	4023	2799	5540	3099	4166	3154
	R.C(398.2529)PVTVCGDVHGQFHDLM(15.994915)ELFR.I	22802	18602	21638	18530	22583	23806
	R.C(398.2529)PVTVCGDVHGQFHDLM(15.994915)ELFR.I	19799	19954	21665	20519	20470	20076
	R.C(398.2529)PVTVCGDVHGQFHDLM(15.994915)ELFR.I	35502	29817	33431	28380	35188	26738
	R.QITQVYGFYDEC(398.2529)LR.K	19337	20494	17068	18959	19166	19775
	R.QITQVYGFYDEC(398.2529)LRK.Y	29850	36421	32863	31031	32096	31173
	R.LQEVPHEGPM(15.994915)C(398.2529)DLLWSDPDDRGGWGISPR.G	9583	7204	12040	7052	7896	8313
	R.NVVTIFSAPNYC(398.2529)YR.C	3891	6079	6127	5897	6172	4558
	R.NVVTIFSAPNYC(398.2529)YR.C	5630	7079	8023	6322	5358	5650
	R.NVVTIFSAPNYC(398.2529)YR.C	0	0	0	0	2262	1363
	R.C(398.2529)GNQAAIM(15.994915)ELDDTLKYSFLQFDPAPR.R	2398	1369	1714	2371	1648	2104
	R.C(398.2529)GNQAAIM(15.994915)ELDDTLKYSFLQFDPAPR.R	2344	3486	1883	1967	2664	1979
O76071	19	0.381	37840	19	20661.2	18621.8	300772	CIAO1 Probable cytosolic iron-sulfur protein assembly protein CIAO1 [REVIEWED] ENSG00000144021;IPI00008791;O76071;A0MNN9;Q53FM5
U	R.IRIWGTEGDSWIC(398.2529)K.S	26520	25264	24768	22785	25130	26481
U	R.IWGTEGDSWIC(398.2529)K.S	10909	10764	10795	11897	12406	15173
U	R.KVAWSPC(398.2529)GNYLASASFDATTCIWK.K	39404	38565	39994	35560	37502	34995
U	R.KVAWSPC(398.2529)GNYLASASFDATTCIWK.K	20405	20182	22427	22715	24028	23344
U	K.VAWSPC(398.2529)GNYLASASFDATTCIWK.K	5611	7249	6460	5667	7752	5838
U	K.VAWSPC(398.2529)GNYLASASFDATTCIWK.K	1474	0	0	0	0	0
U	K.VAWSPC(398.2529)GNYLASASFDATTCIWK.K	5850	3594	3357	3932	5072	3300
U	K.VAWSPC(398.2529)GNYLASASFDATTCIWK.K	1931	1359	1982	2032	2573	1710
U	K.VAWSPC(398.2529)GNYLASASFDATTCIWKK.N	90111	98757	87627	96820	108522	108253
U	K.SVAWAPSGNLLATC(398.2529)SR.D	0	2001	0	1533	0	0
U	K.SVAWAPSGNLLATC(398.2529)SR.D	15934	16163	18526	15027	16408	13642
U	R.QYLPGNEQGVAC(398.2529)SGSDPSWK.C	54904	50338	52718	52670	50750	50595
U	R.QYLPGNEQGVAC(398.2529)SGSDPSWK.C	4364	4018	4797	5399	5537	4953
U	K.C(398.2529)ICTLSGFHSR.T	26621	22155	27063	20766	27304	27182
U	K.C(398.2529)ICTLSGFHSR.T	27093	28198	28427	26416	32327	26673
U	R.TIYDIAWC(398.2529)QLTGALATACGDDAIR.V	1806	0	0	0	0	0
U	R.TIYDIAWC(398.2529)QLTGALATACGDDAIR.V	2256	1092	0	2621	0	0
U	R.TIYDIAWC(398.2529)QLTGALATACGDDAIR.V	0	0	0	1069	0	0
O60739	7	0.381	12824	7	23615.3	21284.1	132543	EIF1B Eukaryotic translation initiation factor 1b [REVIEWED] ENSG00000114784;IPI00031489;O60739;Q9UQF8
	K.FAC(398.2529)NGTVIEHPEYGEVIQLQGDQR.K	46912	46985	44471	49429	43163	45058
	K.FAC(398.2529)NGTVIEHPEYGEVIQLQGDQR.K	14433	15339	13993	11427	13979	13470
	K.FAC(398.2529)NGTVIEHPEYGEVIQLQGDQR.K	21914	15082	19872	16978	21419	16156
	K.FAC(398.2529)NGTVIEHPEYGEVIQLQGDQRK.N	10467	11675	8837	10699	8742	9280
	K.FAC(398.2529)NGTVIEHPEYGEVIQLQGDQRK.N	43124	46086	41702	44699	50890	41811
U	R.KNIC(398.2529)QFLLEVGIVKEEQLK.V	9893	8795	8791	9403	11974	8131
U	K.NIC(398.2529)QFLLEVGIVKEEQLK.V	2246	1328	2859	1557	0	0
P24666	3	0.38	18042	3	7182.67	6473.67	18001	ACP1 Low molecular weight phosphotyrosine protein phosphatase [REVIEWED] ENSG00000143727;IPI00410615;P24666;A8K1L9;P24667;Q16035;Q16036;Q16725;Q3KQX8;Q53RU0
U	K.SVLFVC(398.2529)LGNICR.S	12389	12243	12223	11022	10843	10636
U	R.VDSAATSGYEIGNPPDYRGQSC(398.2529)M(15.994915)K.R	7032	7489	6264	8262	7185	6984
U	K.QLIIEDPYYGNDSDFETVYQQC(398.2529)VR.C	0	0	0	1396	0	0
P62979	15	0.378	17965	15	71406.7	64359.7	796413	RPS27A Ubiquitin-40S ribosomal protein S27a [REVIEWED] ENSG00000143947;IPI00179330;P62979;P02248;P02249;P02250;P14798;P62988;Q29120;Q6LBL4;Q6LDU5;Q8WYN8;Q91887;Q91888;Q9BQ77;Q9BWD6;Q9BX98;Q9UEF2;Q9UEG1;Q9UEK8;Q9UPK7
	-.M(15.994915)QIFVKTLTGKTITLEVEPSDTIENVK.A	16344	4994	13772	6891	7453	70402
U	R.EC(398.2529)PSDECGAGVFM(15.994915)ASHFDR.H	13719	12915	11490	12059	13834	13330
U	R.EC(398.2529)PSDECGAGVFM(15.994915)ASHFDR.H	4599	3843	3627	3842	2180	3343
U	R.EC(398.2529)PSDECGAGVFM(15.994915)ASHFDR.H	27256	26016	25689	31259	26473	24356
U	R.ECPSDEC(398.2529)GAGVFM(15.994915)ASHFDR.H	12772	11954	8737	12956	11154	12737
U	K.CCLTYC(398.2529)FNKPEDK.-	48578	47265	49286	49338	53577	52592
U	K.CC(398.2529)LTYCFNKPEDK.-	16320	15595	13285	15909	12546	12204
U	K.CCLTYC(398.2529)FNKPEDK.-	97713	78578	108062	88358	101848	97429
U	K.CCLTYC(398.2529)FNKPEDK.-	53819	57010	58606	61377	63009	61839
U	K.CC(398.2529)LTYCFNKPEDK.-	21374	19882	24112	20064	21501	24203
U	K.C(398.2529)CLTYCFNKPEDK.-	12602	14544	13979	13449	17298	13689
U	K.CCLTYC(398.2529)FNKPEDK.-	53381	49026	53483	49836	58272	55325
U	K.CC(398.2529)LTYCFNKPEDK.-	132675	125463	153226	137542	159564	149214
U	K.CC(398.2529)LTYCFNKPEDK.-	231404	207154	262585	249621	270159	256956
U	K.CC(398.2529)LTYCFNKPEDK.-	222839	198778	262848	198152	260173	209762
Q6NXT1	14	0.377	32505	14	55082.2	49646	656749	ANKRD54 Ankyrin repeat domain-containing protein 54 [REVIEWED] ENSG00000100124;IPI00828207;Q6NXT1;Q6ZSB1;Q9UGV1
U	R.DSANANDVETVQQLLEDGADPC(398.2529)AADDKGR.T	0	0	1477	0	0	0
U	R.DSANANDVETVQQLLEDGADPC(398.2529)AADDKGR.T	0	0	0	1303	0	0
U	R.DSANANDVETVQQLLEDGADPC(398.2529)AADDKGR.T	1060	0	0	0	0	0
U	R.TALHFASC(398.2529)NGNDQIVQLLLDHGADPNQR.D	5246	4413	7139	3623	5767	7124
U	R.DGLGNTPLHLAAC(398.2529)TNHVPVITTLLR.G	23108	19877	19495	20290	19690	20220
U	K.SKLNILQEGHAQC(398.2529)LEAVR.L	77731	67708	64933	74964	72070	69887
U	K.SKLNILQEGHAQC(398.2529)LEAVRLEVK.Q	6439	6225	4450	8246	4636	6733
U	K.SKLNILQEGHAQC(398.2529)LEAVRLEVK.Q	235892	258476	216139	276713	256047	198425
U	K.LNILQEGHAQC(398.2529)LEAVR.L	13810	12273	15060	12941	12054	13261
U	K.LNILQEGHAQC(398.2529)LEAVRLEVK.Q	22033	26057	18419	24913	24132	23542
U	R.ERLDDLC(398.2529)TR.L	68351	73473	70321	70472	62592	66625
U	R.LDDLC(398.2529)TR.L	10464	14880	14293	12295	9277	13514
U	R.LDDLC(398.2529)TR.L	112585	131598	123998	133443	109401	128605
U	R.LDDLC(398.2529)TR.L	118325	104940	113500	110886	106152	102771
P35754	50	0.377	11776	50	5838.76	5262.28	143362	GLRX Glutaredoxin-1 [REVIEWED] ENSG00000173221;IPI00219025;P35754;B2R4L2;Q3KQS1;Q6ICT1
U	K.VVVFIKPTC(398.2529)PYCR.R	1648	0	2708	2013	2192	2540
U	K.VVVFIKPTC(398.2529)PYCR.R	0	0	1988	0	0	2369
U	K.VVVFIKPTC(398.2529)PYCR.R	1343	0	0	949	0	0
U	K.VVVFIKPTC(398.2529)PYCR.R	0	1876	0	0	0	0
U	K.VVVFIKPTC(398.2529)PYCR.R	1366	0	0	0	1078	2571
U	K.VVVFIKPTC(398.2529)PYCR.R	4208	5559	3088	5233	4409	4056
U	K.VVVFIKPTC(398.2529)PYCR.R	7672	6416	5811	6872	8684	7733
U	K.VVVFIKPTC(398.2529)PYCR.R	8181	9225	8083	7873	8123	11221
U	K.VVVFIKPTC(398.2529)PYCR.R	8517	8746	8190	6973	9704	8760
U	K.VVVFIKPTC(398.2529)PYCR.R	12557	12830	14845	12298	13064	11192
U	K.VVVFIKPTC(398.2529)PYCR.R	8192	10462	11442	10651	10127	12373
U	K.VVVFIKPTC(398.2529)PYCR.R	14787	11565	13455	13700	12504	14556
U	K.VVVFIKPTC(398.2529)PYCR.R	10091	9214	9589	11747	11776	13490
U	K.VVVFIKPTC(398.2529)PYCR.R	10775	9999	11220	11925	12179	12647
U	K.VVVFIKPTC(398.2529)PYCR.R	8411	9408	7409	7986	8017	9414
U	K.VVVFIKPTC(398.2529)PYCR.R	5076	3341	5366	6237	4319	4901
U	K.VVVFIKPTC(398.2529)PYCR.R	1466	2887	0	3791	2326	4331
U	K.VVVFIKPTC(398.2529)PYCR.R	1315	1369	0	1186	1471	1766
U	K.VVVFIKPTC(398.2529)PYCR.R	0	0	0	0	0	1290
U	K.VVVFIKPTC(398.2529)PYCR.R	0	0	1670	0	0	0
U	K.VVVFIKPTC(398.2529)PYCR.R	12868	15380	16505	12738	10427	12569
U	K.VVVFIKPTC(398.2529)PYCR.R	2897	3522	4474	3527	3739	5215
U	K.VVVFIKPTC(398.2529)PYCR.R	4959	6659	5520	5520	6099	4998
U	K.VVVFIKPTC(398.2529)PYCR.R	1628	2405	1853	1396	1956	1567
U	K.VVVFIKPTC(398.2529)PYCR.R	0	0	0	0	1495	0
U	K.VVVFIKPTC(398.2529)PYCR.R	2957	3387	3636	2720	3051	3050
U	R.VFIGKDCIGGC(398.2529)SDLVSLQQSGELLTR.L	8868	8848	7414	10616	6133	8422
U	R.VFIGKDCIGGC(398.2529)SDLVSLQQSGELLTR.L	2723	2209	1688	2279	1434	1770
U	K.DCIGGC(398.2529)SDLVSLQQSGELLTR.L	10101	11835	10371	9444	7328	10925
P13489	25	0.373	49974	25	16598.9	14960.4	318736	RNH1 Ribonuclease inhibitor [REVIEWED] ENSG00000023191;IPI00550069;P13489;Q8IZK8;Q96FD7;Q9BQ80;Q9UDK6
U	R.WAELLPLLQQC(398.2529)QVVR.L	12517	10405	11159	11373	10457	9611
U	R.LDDC(398.2529)GLTEAR.C	37623	35490	39626	34230	31158	31567
U	R.LDDC(398.2529)GLTEAR.C	35897	40671	36193	34570	35884	35557
U	R.LDDC(398.2529)GLTEAR.C	39877	39113	44902	36123	36406	38079
U	R.SNELGDVGVHC(398.2529)VLQGLQTPSCK.I	8700	8400	7819	8668	7852	8417
U	R.SNELGDVGVHCVLQGLQTPSC(398.2529)K.I	2427	2579	2681	3053	1647	1774
U	R.SNELGDVGVHCVLQGLQTPSC(398.2529)K.I	3249	2783	4625	5165	4104	4174
U	R.SNELGDVGVHC(398.2529)VLQGLQTPSCK.I	56840	53754	53800	61588	52329	61144
U	R.SNELGDVGVHC(398.2529)VLQGLQTPSCK.I	31542	30544	36647	37869	29104	34295
U	K.LSLQNCC(398.2529)LTGAGCGVLSSTLR.T	0	1262	1934	0	1540	1646
U	K.LSLQNC(398.2529)CLTGAGCGVLSSTLR.T	3489	3230	2773	4718	2689	3889
U	K.LQLEYC(398.2529)SLSAASCEPLASVLR.A	2889	2745	3716	0	3391	2451
U	K.LQLEYC(398.2529)SLSAASCEPLASVLR.A	5208	4514	5418	4370	2581	5999
U	K.LQLEYCSLSAASC(398.2529)EPLASVLR.A	1392	1334	0	1702	1966	0
U	R.DLC(398.2529)GIVASK.A	17155	17368	13176	16739	14024	15490
U	K.LGDVGM(15.994915)AELC(398.2529)PGLLHPSSR.L	4841	5855	4857	5073	5225	5182
U	R.LLC(398.2529)ETLLEPGCQLESLWVK.S	9677	7666	10573	7518	10960	7246
U	R.LLCETLLEPGC(398.2529)QLESLWVK.S	0	0	0	1798	1764	0
U	R.LLCETLLEPGC(398.2529)QLESLWVK.S	28895	28812	31651	24914	29793	22241
U	R.ELC(398.2529)QGLGQPGSVLR.V	33625	42781	37144	33386	26511	24549
U	R.ELDLSNNC(398.2529)LGDAGILQLVESVR.Q	3635	3861	2900	4825	2660	2771
U	R.ELDLSNNC(398.2529)LGDAGILQLVESVR.Q	3625	4762	4356	3171	4904	3541
U	R.ELDLSNNC(398.2529)LGDAGILQLVESVR.Q	987	1459	0	0	0	0
Q9NZL4	31	0.373	39474	31	35128.1	31661.1	802759	HSPBP1 Hsp70-binding protein 1 [REVIEWED] ENSG00000133265;IPI00442503;Q9NZL4;B3KQP0;O95351;Q6ZNU5
U	R.GSRLPLALPPASQGC(398.2529)SSGGGGGGGGGSSAGGSGNSRPPR.N	13274	13703	13738	17653	14648	16698
U	R.GSRLPLALPPASQGC(398.2529)SSGGGGGGGGGSSAGGSGNSRPPR.N	4787	5769	7762	5536	4234	5276
U	R.GSRLPLALPPASQGC(398.2529)SSGGGGGGGGGSSAGGSGNSRPPR.N	0	1404	0	1634	0	0
U	R.GSRLPLALPPASQGC(398.2529)SSGGGGGGGGGSSAGGSGNSRPPR.N	49542	54085	47560	51905	44627	53887
U	R.GSRLPLALPPASQGC(398.2529)SSGGGGGGGGGSSAGGSGNSRPPR.N	17116	15050	16675	18331	17082	18542
U	R.GSRLPLALPPASQGC(398.2529)SSGGGGGGGGGSSAGGSGNSRPPR.N	24254	22324	21915	25075	23650	29778
U	R.GSRLPLALPPASQGC(398.2529)SSGGGGGGGGGSSAGGSGNSRPPR.N	17127	15232	15552	15003	16252	17456
U	R.GSRLPLALPPASQGC(398.2529)SSGGGGGGGGGSSAGGSGNSRPPR.N	6506	6496	6954	5449	6182	5955
U	R.GSRLPLALPPASQGC(398.2529)SSGGGGGGGGGSSAGGSGNSRPPR.N	11747	11210	9041	9231	11169	9815
U	R.GSRLPLALPPASQGC(398.2529)SSGGGGGGGGGSSAGGSGNSRPPR.N	2506	2760	2803	2969	3900	2105
U	R.GSRLPLALPPASQGC(398.2529)SSGGGGGGGGGSSAGGSGNSRPPR.N	2676	4282	2559	3444	3772	5097
U	R.LPLALPPASQGC(398.2529)SSGGGGGGGGGSSAGGSGNSRPPR.N	54123	55156	56092	60569	62735	52520
U	R.LPLALPPASQGC(398.2529)SSGGGGGGGGGSSAGGSGNSRPPR.N	19187	16001	17222	20554	14531	16824
U	R.LPLALPPASQGC(398.2529)SSGGGGGGGGGSSAGGSGNSRPPR.N	17113	18231	16694	18068	18120	15862
U	R.LPLALPPASQGC(398.2529)SSGGGGGGGGGSSAGGSGNSRPPR.N	146303	137923	136222	141342	133731	136432
U	R.LPLALPPASQGC(398.2529)SSGGGGGGGGGSSAGGSGNSRPPR.N	8967	6753	6774	7167	5821	5731
U	R.LPLALPPASQGC(398.2529)SSGGGGGGGGGSSAGGSGNSRPPR.N	10293	8164	5876	7553	0	6241
U	R.QWLQEAM(15.994915)SAAFRGQREEVEQMKSC(398.2529)LR.V	10446	10124	10524	11495	8471	12125
U	R.AAQLIGTC(398.2529)SQNVAAIQEQVLGLGALR.K	0	0	0	1579	2053	0
U	R.LLDRDAC(398.2529)DTVR.V	191586	199734	186084	201141	180141	245301
U	R.LLDRDAC(398.2529)DTVR.V	14851	14145	14791	13407	11738	15529
U	R.LLDRDAC(398.2529)DTVR.V	99955	98611	89259	101713	91470	109232
U	R.LLDRDAC(398.2529)DTVR.V	133687	128980	126888	138081	119729	150662
U	R.DAC(398.2529)DTVR.V	3635	4528	5038	3144	4263	3913
U	R.DAC(398.2529)DTVR.V	2163	0	2260	1175	1168	0
U	R.EC(398.2529)REPELGLEELLR.H	10776	13117	8231	8630	11790	9793
U	R.EC(398.2529)REPELGLEELLR.H	2488	4396	0	3178	3186	2280
U	R.C(398.2529)QLLQQHEEYQEELEFCEK.L	11404	11791	9873	11501	8696	9390
P07437	229	0.372	49671	229	72216.8	65089.8	10307551	TUBB Tubulin beta chain [REVIEWED] ENSG00000229684;ENSG00000232575;ENSG00000235067;ENSG00000196230;ENSG00000227739;ENSG00000183311;ENSG00000232421;ENSG00000224156;IPI01019113;P07437;P05218;Q8WUC1;Q9CY33
	R.AILVDLEPGTM(15.994915)DSVR.S	35529	38325	37576	13501	21744	48016
	K.EAESC(398.2529)DCLQGFQLTH.S	9562	9582	9076	7962	7620	6929
	K.VSDTVVEPYNATLSVHQLVENTDETYCIDNEALYDIC(398.2529)FR.T	9058	8917	6920	7791	6332	7320
	K.VSDTVVEPYNATLSVHQLVENTDETYCIDNEALYDIC(398.2529)FR.T	2800	1764	0	1827	2473	1628
	K.VSDTVVEPYNATLSVHQLVENTDETYCIDNEALYDIC(398.2529)FR.T	0	0	0	0	0	1496
	K.VSDTVVEPYNATLSVHQLVENTDETYCIDNEALYDIC(398.2529)FR.T	0	1776	0	0	0	0
	K.VSDTVVEPYNATLSVHQLVENTDETYCIDNEALYDIC(398.2529)FR.T	3110	2388	2774	2035	0	2753
	K.VSDTVVEPYNATLSVHQLVENTDETYCIDNEALYDIC(398.2529)FR.T	1388	0	0	1191	0	0
	K.VSDTVVEPYNATLSVHQLVENTDETYCIDNEALYDIC(398.2529)FR.T	0	0	0	0	1340	0
	K.VSDTVVEPYNATLSVHQLVENTDETYCIDNEALYDIC(398.2529)FR.T	4989	5336	5687	4963	4792	4088
	K.VSDTVVEPYNATLSVHQLVENTDETYCIDNEALYDIC(398.2529)FR.T	3775	2453	0	3897	1953	4109
	K.VSDTVVEPYNATLSVHQLVENTDETYCIDNEALYDIC(398.2529)FR.T	2324	2239	2472	2151	1232	1939
	K.VSDTVVEPYNATLSVHQLVENTDETYCIDNEALYDIC(398.2529)FR.T	7644	7225	4845	6747	4384	7351
	K.VSDTVVEPYNATLSVHQLVENTDETYCIDNEALYDIC(398.2529)FR.T	6810	3641	2910	5772	3824	6298
	K.VSDTVVEPYNATLSVHQLVENTDETYCIDNEALYDIC(398.2529)FR.T	0	0	0	1317	0	1276
	H.QLVENTDETYCIDNEALYDIC(398.2529)FR.T	0	0	0	1307	0	2103
	L.VENTDETYCIDNEALYDIC(398.2529)FR.T	1647	1429	2619	3642	1763	3612
	E.NTDETYC(398.2529)IDNEALYDICFR.T	1860	2623	2418	3015	0	3669
	N.TDETYCIDNEALYDIC(398.2529)FR.T	3325	4369	4504	3780	3345	4708
	R.TLKLTTPTYGDLNHLVSATMSGVTTC(398.2529)LR.F	66436	64226	64734	72730	65892	77449
	R.TLKLTTPTYGDLNHLVSATM(15.994915)SGVTTC(398.2529)LR.F	0	0	1568	0	0	0
	R.TLKLTTPTYGDLNHLVSATM(15.994915)SGVTTC(398.2529)LR.F	2791	1268	0	1758	1948	1564
	R.TLKLTTPTYGDLNHLVSATM(15.994915)SGVTTC(398.2529)LR.F	1826	3169	2026	2159	1613	2776
	R.TLKLTTPTYGDLNHLVSATM(15.994915)SGVTTC(398.2529)LR.F	3940	4072	2260	4945	5333	6253
	R.TLKLTTPTYGDLNHLVSATM(15.994915)SGVTTC(398.2529)LR.F	15381	15958	15948	19173	16729	17647
	R.TLKLTTPTYGDLNHLVSATM(15.994915)SGVTTC(398.2529)LR.F	36077	37792	37664	44294	44265	45572
	R.TLKLTTPTYGDLNHLVSATM(15.994915)SGVTTC(398.2529)LR.F	6004	7837	9212	8806	5841	6682
	R.TLKLTTPTYGDLNHLVSATM(15.994915)SGVTTC(398.2529)LR.F	6520	7709	6142	7621	7637	6809
	R.TLKLTTPTYGDLNHLVSATM(15.994915)SGVTTC(398.2529)LR.F	7271	7958	8850	6803	8953	7945
	R.TLKLTTPTYGDLNHLVSATM(15.994915)SGVTTC(398.2529)LR.F	1561	2163	2809	3009	2082	3311
	R.TLKLTTPTYGDLNHLVSATM(15.994915)SGVTTC(398.2529)LR.F	33444	38506	37634	37530	37346	43995
	R.TLKLTTPTYGDLNHLVSATM(15.994915)SGVTTC(398.2529)LR.F	76611	72692	76658	84196	67549	89858
	R.TLKLTTPTYGDLNHLVSATM(15.994915)SGVTTC(398.2529)LR.F	4390	3562	4673	4631	3645	5257
	K.LTTPTYGDLNHLVSATMSGVTTC(398.2529)LR.F	5553	4985	4585	5037	4343	5247
	K.LTTPTYGDLNHLVSATMSGVTTC(398.2529)LR.F	21956	18740	22868	23887	18428	19908
	K.LTTPTYGDLNHLVSATMSGVTTC(398.2529)LR.F	4545	3602	3250	2242	3191	2177
	K.LTTPTYGDLNHLVSATMSGVTTC(398.2529)LR.F	25710	31973	30035	29036	25413	25696
	K.LTTPTYGDLNHLVSATMSGVTTC(398.2529)LR.F	24315	25059	22953	22200	24904	22257
	K.LTTPTYGDLNHLVSATMSGVTTC(398.2529)LR.F	207618	147049	219416	172057	162605	173982
	K.LTTPTYGDLNHLVSATMSGVTTC(398.2529)LR.F	72297	79257	85555	75981	68253	70928
	K.LTTPTYGDLNHLVSATMSGVTTC(398.2529)LR.F	11506	7901	10027	9141	8119	7378
	K.LTTPTYGDLNHLVSATM(15.994915)SGVTTC(398.2529)LR.F	2380	3376	2124	2331	2464	0
	K.LTTPTYGDLNHLVSATM(15.994915)SGVTTC(398.2529)LR.F	3070	3499	2875	3969	3153	2667
	K.LTTPTYGDLNHLVSATM(15.994915)SGVTTC(398.2529)LR.F	2411	1393	1350	1267	0	0
	K.LTTPTYGDLNHLVSATM(15.994915)SGVTTC(398.2529)LR.F	2829	0	1657	0	1048	2289
	K.LTTPTYGDLNHLVSATM(15.994915)SGVTTC(398.2529)LR.F	0	1998	0	2676	1895	2037
	K.LTTPTYGDLNHLVSATM(15.994915)SGVTTC(398.2529)LR.F	2541	3051	2208	3459	2350	0
	K.LTTPTYGDLNHLVSATM(15.994915)SGVTTC(398.2529)LR.F	14102	12716	14041	15224	12378	10553
	K.LTTPTYGDLNHLVSATM(15.994915)SGVTTC(398.2529)LR.F	58673	64891	59017	65207	49491	58734
	K.LTTPTYGDLNHLVSATM(15.994915)SGVTTC(398.2529)LR.F	24397	26468	24205	22617	22997	20906
	K.LTTPTYGDLNHLVSATM(15.994915)SGVTTC(398.2529)LR.F	28029	24734	25456	26475	24231	22659
	K.LTTPTYGDLNHLVSATM(15.994915)SGVTTC(398.2529)LR.F	82740	79512	83370	76870	74701	72229
	K.LTTPTYGDLNHLVSATM(15.994915)SGVTTC(398.2529)LR.F	1424	0	1641	2427	0	0
	K.LTTPTYGDLNHLVSATM(15.994915)SGVTTC(398.2529)LR.F	0	0	1808	0	0	0
	K.LTTPTYGDLNHLVSATM(15.994915)SGVTTC(398.2529)LR.F	0	1363	1892	1215	0	0
	K.LTTPTYGDLNHLVSATM(15.994915)SGVTTC(398.2529)LR.F	2595	1225	0	0	3005	3219
	K.LTTPTYGDLNHLVSATM(15.994915)SGVTTC(398.2529)LR.F	4860	1913	3873	2192	2983	3357
	K.LTTPTYGDLNHLVSATM(15.994915)SGVTTC(398.2529)LR.F	2647	1525	2546	2993	1651	1499
	K.LTTPTYGDLNHLVSATM(15.994915)SGVTTC(398.2529)LR.F	1252	1286	1597	0	0	0
	K.LTTPTYGDLNHLVSATM(15.994915)SGVTTC(398.2529)LR.F	7606	9284	6880	7199	6723	7552
	K.LTTPTYGDLNHLVSATM(15.994915)SGVTTC(398.2529)LR.F	19811	20725	19567	23464	18981	22927
	K.LTTPTYGDLNHLVSATM(15.994915)SGVTTC(398.2529)LR.F	33521	35574	30435	35753	28723	26846
	K.LTTPTYGDLNHLVSATM(15.994915)SGVTTC(398.2529)LR.F	38000	40396	30385	36534	27629	34131
	K.LTTPTYGDLNHLVSATM(15.994915)SGVTTC(398.2529)LR.F	6823	10847	6905	8818	6768	5923
	K.LTTPTYGDLNHLVSATM(15.994915)SGVTTC(398.2529)LR.F	229474	252232	237007	209959	194383	219943
	K.LTTPTYGDLNHLVSATM(15.994915)SGVTTC(398.2529)LR.F	33472	28817	31994	37066	21795	34362
	K.LTTPTYGDLNHLVSATM(15.994915)SGVTTC(398.2529)LR.F	79891	83505	78418	75526	61036	59441
	K.LTTPTYGDLNHLVSATM(15.994915)SGVTTC(398.2529)LR.F	6393	6611	6460	8308	5332	6976
	K.LTTPTYGDLNHLVSATM(15.994915)SGVTTC(398.2529)LR.F	3382	2878	2839	2817	1350	2725
	K.LTTPTYGDLNHLVSATM(15.994915)SGVTTC(398.2529)LR.F	3781	5454	4401	4208	4435	4350
	K.LTTPTYGDLNHLVSATM(15.994915)SGVTTC(398.2529)LR.F	56155	54075	52379	53746	52678	55667
	K.LTTPTYGDLNHLVSATM(15.994915)SGVTTC(398.2529)LR.F	148283	151507	152585	141942	125579	140765
	K.LTTPTYGDLNHLVSATM(15.994915)SGVTTC(398.2529)LR.F	29501	37953	26591	35624	25043	34141
	K.LTTPTYGDLNHLVSATM(15.994915)SGVTTC(398.2529)LR.F	6815	7469	3695	7512	4610	5427
	K.LTTPTYGDLNHLVSATM(15.994915)SGVTTC(398.2529)LR.F	1158	2071	0	1520	3008	1459
	K.LTTPTYGDLNHLVSATM(15.994915)SGVTTC(398.2529)LR.F	1873	3052	2719	1623	1751	1257
	K.LTTPTYGDLNHLVSATMSGVTTC(398.2529)LRFPGQLNADLR.K	13048	16164	12476	14783	12138	18397
	K.LTTPTYGDLNHLVSATMSGVTTC(398.2529)LRFPGQLNADLR.K	8770	10857	8375	10473	8643	14273
	K.LTTPTYGDLNHLVSATM(15.994915)SGVTTC(398.2529)LRFPGQLNADLR.K	1580	1511	4376	2304	1872	4617
	K.LTTPTYGDLNHLVSATM(15.994915)SGVTTC(398.2529)LRFPGQLNADLR.K	17087	18599	17900	19571	15173	22706
	K.LTTPTYGDLNHLVSATM(15.994915)SGVTTC(398.2529)LRFPGQLNADLR.K	15715	17665	13039	18853	14336	23551
	K.LTTPTYGDLNHLVSATMSGVTTC(398.2529)LRFPGQLNADLRK.L	14782	18030	18634	20130	16282	24713
	K.LTTPTYGDLNHLVSATM(15.994915)SGVTTC(398.2529)LRFPGQLNADLRK.L	19778	21057	18962	28356	24171	29429
	K.LTTPTYGDLNHLVSATM(15.994915)SGVTTC(398.2529)LRFPGQLNADLRK.L	15609	18645	18316	23157	18502	26322
	K.NMMAAC(398.2529)DPR.H	75413	87447	84197	76342	81130	76955
	K.NM(15.994915)MAAC(398.2529)DPR.H	259015	267894	279551	259492	262231	246322
	K.NM(15.994915)MAAC(398.2529)DPR.H	64647	63332	70116	67902	68907	66249
	K.NMM(15.994915)AAC(398.2529)DPR.H	137894	138662	140796	139523	132725	125478
	K.NMM(15.994915)AAC(398.2529)DPR.H	33227	33508	39965	34829	36909	36537
	K.NM(15.994915)MAAC(398.2529)DPR.H	49037	46834	44589	45307	41141	43455
	K.EVDEQM(15.994915)LNVQNK.N	2291	1864	1398	1613	0	1518
	K.TAVC(398.2529)DIPPR.G	11438	12002	13797	13869	11025	12484
	K.TAVC(398.2529)DIPPR.G	51803	50729	49613	52083	42632	47352
	K.TAVC(398.2529)DIPPR.G	72666	74294	69981	72362	64571	66950
	K.TAVC(398.2529)DIPPR.G	119427	116953	118998	114010	108715	106541
	K.TAVC(398.2529)DIPPR.G	124659	137390	122694	126263	122654	117249
	K.TAVC(398.2529)DIPPR.G	78685	85485	79036	77964	70656	68659
	K.TAVC(398.2529)DIPPR.G	50660	56825	44434	51467	42580	50227
	K.TAVC(398.2529)DIPPR.G	58189	61263	54870	56531	46768	53067
	K.TAVC(398.2529)DIPPR.G	44963	48332	49696	43286	44047	45976
	K.TAVC(398.2529)DIPPR.G	36817	41817	41530	37048	35039	36315
	K.TAVC(398.2529)DIPPR.G	35022	39549	36153	36178	34167	30923
	K.TAVC(398.2529)DIPPR.G	24873	27276	23019	26429	24235	18385
	K.TAVC(398.2529)DIPPR.G	20549	22664	19934	17625	15803	19295
	K.TAVC(398.2529)DIPPR.G	46156	52919	45450	47522	40806	43333
	K.TAVC(398.2529)DIPPR.G	212611	232110	225370	209824	196570	198969
	K.TAVC(398.2529)DIPPR.G	254383	252192	247769	244579	238143	226252
	K.TAVC(398.2529)DIPPR.G	310382	329303	332921	301245	301592	288462
	K.TAVC(398.2529)DIPPR.G	396048	415793	407608	402808	388870	372368
	K.TAVC(398.2529)DIPPR.G	454351	494030	475605	431757	440776	414304
	K.TAVC(398.2529)DIPPR.G	312454	314597	300728	311734	278829	284597
	K.TAVC(398.2529)DIPPR.G	401882	383468	396670	394296	358366	356920
	K.TAVC(398.2529)DIPPR.G	375363	384582	363781	363212	333819	357973
	K.TAVC(398.2529)DIPPR.G	302986	292939	321307	304270	294902	269677
	K.TAVC(398.2529)DIPPR.G	185114	195514	195823	167558	174386	164137
	K.TAVC(398.2529)DIPPR.G	180973	168620	170864	169066	158406	148721
	K.TAVC(398.2529)DIPPR.G	150448	151413	143495	143663	143340	119865
	K.TAVC(398.2529)DIPPR.G	110352	122882	116719	114950	106142	105557
	K.TAVC(398.2529)DIPPR.G	87509	94460	87576	83259	75006	76843
	K.TAVC(398.2529)DIPPR.G	76423	77452	84584	75799	74855	76820
	K.TAVC(398.2529)DIPPR.G	70615	77739	73312	75886	68946	69879
	K.TAVC(398.2529)DIPPR.G	28414	24341	24803	25522	21467	24308
	K.TAVC(398.2529)DIPPR.G	33719	35222	31276	33680	32533	32261
	K.TAVC(398.2529)DIPPR.G	112375	124911	120947	121981	111360	119617
	K.TAVC(398.2529)DIPPR.G	180930	177924	189347	174912	175194	169548
	K.TAVC(398.2529)DIPPR.G	154345	140646	151751	142100	143624	145964
	K.TAVC(398.2529)DIPPR.G	144917	160028	163114	154447	134988	132029
	K.TAVC(398.2529)DIPPR.G	138647	134811	138392	122560	129254	120984
	K.TAVC(398.2529)DIPPR.G	135720	142661	144750	141413	141953	131679
	K.TAVC(398.2529)DIPPR.G	89259	88968	91848	77096	81276	77384
	K.TAVC(398.2529)DIPPR.G	81556	87496	79562	78879	78205	69705
	K.TAVC(398.2529)DIPPR.G	58838	59878	64777	59208	56077	53559
	K.TAVC(398.2529)DIPPR.G	50805	58377	48003	47163	48900	41491
	K.TAVC(398.2529)DIPPR.G	44909	44511	46188	44048	43339	43758
	K.TAVC(398.2529)DIPPR.G	30637	26900	31762	23117	25140	23305
	K.TAVC(398.2529)DIPPR.G	17191	16175	22303	16126	19555	16507
	K.TAVC(398.2529)DIPPR.G	3987	2728	2934	2420	1771	2453
	K.TAVC(398.2529)DIPPR.G	5228	4847	6712	4449	5633	4316
	K.TAVC(398.2529)DIPPR.G	5238	4042	4930	3906	4836	2779
	K.TAVC(398.2529)DIPPR.G	5842	6419	5810	5643	5572	4383
	K.TAVC(398.2529)DIPPR.G	5770	4969	6622	4568	4694	4060
	K.TAVC(398.2529)DIPPR.G	81160	77806	71100	72458	68829	65044
	K.TAVC(398.2529)DIPPR.G	357509	376851	314376	327810	304157	295046
	K.TAVC(398.2529)DIPPR.G	182650	192548	181200	196602	170429	163584
	K.TAVC(398.2529)DIPPR.G	20494	23729	20566	16849	18429	20161
	K.TAVC(398.2529)DIPPR.G	45662	45108	47035	42672	39023	43372
	K.TAVC(398.2529)DIPPR.G	264188	271487	246207	251981	248638	236243
	K.TAVC(398.2529)DIPPR.G	107776	110300	105776	103397	103017	92429
	K.TAVC(398.2529)DIPPR.G	53234	55551	53893	54330	48528	55254
	K.TAVC(398.2529)DIPPR.G	63691	61075	64377	54139	54379	54689
	K.TAVC(398.2529)DIPPR.G	347626	358040	381010	358349	359226	337286
	K.TAVC(398.2529)DIPPRGLK.M	31016	36004	35840	36249	36069	48818
	K.TAVC(398.2529)DIPPRGLK.M	84260	89962	92262	91365	86522	116908
	K.TAVC(398.2529)DIPPRGLK.M	50772	59373	53781	60699	58452	76253
	K.TAVC(398.2529)DIPPRGLK.M	59300	79136	78598	78731	75082	106824
	K.TAVC(398.2529)DIPPRGLK.M	61369	69373	78855	71867	68068	86198
	K.TAVC(398.2529)DIPPRGLK.M	26109	26496	23736	26414	24496	32302
	K.TAVC(398.2529)DIPPRGLK.M	25336	25487	22494	27593	26701	29665
	K.TAVC(398.2529)DIPPRGLK.M	40592	36808	41977	45043	48366	65975
	K.TAVC(398.2529)DIPPRGLK.M	49493	56880	55282	58692	66805	64436
	K.TAVC(398.2529)DIPPRGLK.M	54947	60515	58687	63793	64511	91410
	K.TAVC(398.2529)DIPPRGLK.M	62242	61231	70360	67916	70072	88452
	K.TAVC(398.2529)DIPPRGLK.M	62776	65230	65214	73698	66316	88593
	K.TAVC(398.2529)DIPPRGLK.M	45868	61806	51800	56152	53263	78006
	K.TAVC(398.2529)DIPPRGLK.M	63983	67788	73019	71644	77530	86599
	K.TAVC(398.2529)DIPPRGLK.M	35137	40019	37123	37489	41264	47137
	K.TAVC(398.2529)DIPPRGLK.M	202658	227151	227916	250813	226653	308494
	K.TAVC(398.2529)DIPPRGLK.M	71757	81797	84031	88886	84706	115118
P68371	229	0.371	49831	229	72011.2	64904.5	10275771	TUBB4B Tubulin beta-4B chain [REVIEWED] ENSG00000188229;IPI00007752;P68371;A2BFA2;P05217
	R.AVLVDLEPGTM(15.994915)DSVR.S	4394	3488	6071	2887	2991	6399
	K.EAESC(398.2529)DCLQGFQLTH.S	9562	9582	9076	7962	7620	6929
	K.VSDTVVEPYNATLSVHQLVENTDETYCIDNEALYDIC(398.2529)FR.T	9058	8917	6920	7791	6332	7320
	K.VSDTVVEPYNATLSVHQLVENTDETYCIDNEALYDIC(398.2529)FR.T	2800	1764	0	1827	2473	1628
	K.VSDTVVEPYNATLSVHQLVENTDETYCIDNEALYDIC(398.2529)FR.T	0	0	0	0	0	1496
	K.VSDTVVEPYNATLSVHQLVENTDETYCIDNEALYDIC(398.2529)FR.T	0	1776	0	0	0	0
	K.VSDTVVEPYNATLSVHQLVENTDETYCIDNEALYDIC(398.2529)FR.T	3110	2388	2774	2035	0	2753
	K.VSDTVVEPYNATLSVHQLVENTDETYCIDNEALYDIC(398.2529)FR.T	1388	0	0	1191	0	0
	K.VSDTVVEPYNATLSVHQLVENTDETYCIDNEALYDIC(398.2529)FR.T	0	0	0	0	1340	0
	K.VSDTVVEPYNATLSVHQLVENTDETYCIDNEALYDIC(398.2529)FR.T	4989	5336	5687	4963	4792	4088
	K.VSDTVVEPYNATLSVHQLVENTDETYCIDNEALYDIC(398.2529)FR.T	3775	2453	0	3897	1953	4109
	K.VSDTVVEPYNATLSVHQLVENTDETYCIDNEALYDIC(398.2529)FR.T	2324	2239	2472	2151	1232	1939
	K.VSDTVVEPYNATLSVHQLVENTDETYCIDNEALYDIC(398.2529)FR.T	7644	7225	4845	6747	4384	7351
	K.VSDTVVEPYNATLSVHQLVENTDETYCIDNEALYDIC(398.2529)FR.T	6810	3641	2910	5772	3824	6298
	K.VSDTVVEPYNATLSVHQLVENTDETYCIDNEALYDIC(398.2529)FR.T	0	0	0	1317	0	1276
	H.QLVENTDETYCIDNEALYDIC(398.2529)FR.T	0	0	0	1307	0	2103
	L.VENTDETYCIDNEALYDIC(398.2529)FR.T	1647	1429	2619	3642	1763	3612
	E.NTDETYC(398.2529)IDNEALYDICFR.T	1860	2623	2418	3015	0	3669
	N.TDETYCIDNEALYDIC(398.2529)FR.T	3325	4369	4504	3780	3345	4708
	R.TLKLTTPTYGDLNHLVSATMSGVTTC(398.2529)LR.F	66436	64226	64734	72730	65892	77449
	R.TLKLTTPTYGDLNHLVSATM(15.994915)SGVTTC(398.2529)LR.F	0	0	1568	0	0	0
	R.TLKLTTPTYGDLNHLVSATM(15.994915)SGVTTC(398.2529)LR.F	2791	1268	0	1758	1948	1564
	R.TLKLTTPTYGDLNHLVSATM(15.994915)SGVTTC(398.2529)LR.F	1826	3169	2026	2159	1613	2776
	R.TLKLTTPTYGDLNHLVSATM(15.994915)SGVTTC(398.2529)LR.F	3940	4072	2260	4945	5333	6253
	R.TLKLTTPTYGDLNHLVSATM(15.994915)SGVTTC(398.2529)LR.F	15381	15958	15948	19173	16729	17647
	R.TLKLTTPTYGDLNHLVSATM(15.994915)SGVTTC(398.2529)LR.F	36077	37792	37664	44294	44265	45572
	R.TLKLTTPTYGDLNHLVSATM(15.994915)SGVTTC(398.2529)LR.F	6004	7837	9212	8806	5841	6682
	R.TLKLTTPTYGDLNHLVSATM(15.994915)SGVTTC(398.2529)LR.F	6520	7709	6142	7621	7637	6809
	R.TLKLTTPTYGDLNHLVSATM(15.994915)SGVTTC(398.2529)LR.F	7271	7958	8850	6803	8953	7945
	R.TLKLTTPTYGDLNHLVSATM(15.994915)SGVTTC(398.2529)LR.F	1561	2163	2809	3009	2082	3311
	R.TLKLTTPTYGDLNHLVSATM(15.994915)SGVTTC(398.2529)LR.F	33444	38506	37634	37530	37346	43995
	R.TLKLTTPTYGDLNHLVSATM(15.994915)SGVTTC(398.2529)LR.F	76611	72692	76658	84196	67549	89858
	R.TLKLTTPTYGDLNHLVSATM(15.994915)SGVTTC(398.2529)LR.F	4390	3562	4673	4631	3645	5257
	K.LTTPTYGDLNHLVSATMSGVTTC(398.2529)LR.F	5553	4985	4585	5037	4343	5247
	K.LTTPTYGDLNHLVSATMSGVTTC(398.2529)LR.F	21956	18740	22868	23887	18428	19908
	K.LTTPTYGDLNHLVSATMSGVTTC(398.2529)LR.F	4545	3602	3250	2242	3191	2177
	K.LTTPTYGDLNHLVSATMSGVTTC(398.2529)LR.F	25710	31973	30035	29036	25413	25696
	K.LTTPTYGDLNHLVSATMSGVTTC(398.2529)LR.F	24315	25059	22953	22200	24904	22257
	K.LTTPTYGDLNHLVSATMSGVTTC(398.2529)LR.F	207618	147049	219416	172057	162605	173982
	K.LTTPTYGDLNHLVSATMSGVTTC(398.2529)LR.F	72297	79257	85555	75981	68253	70928
	K.LTTPTYGDLNHLVSATMSGVTTC(398.2529)LR.F	11506	7901	10027	9141	8119	7378
	K.LTTPTYGDLNHLVSATM(15.994915)SGVTTC(398.2529)LR.F	2380	3376	2124	2331	2464	0
	K.LTTPTYGDLNHLVSATM(15.994915)SGVTTC(398.2529)LR.F	3070	3499	2875	3969	3153	2667
	K.LTTPTYGDLNHLVSATM(15.994915)SGVTTC(398.2529)LR.F	2411	1393	1350	1267	0	0
	K.LTTPTYGDLNHLVSATM(15.994915)SGVTTC(398.2529)LR.F	2829	0	1657	0	1048	2289
	K.LTTPTYGDLNHLVSATM(15.994915)SGVTTC(398.2529)LR.F	0	1998	0	2676	1895	2037
	K.LTTPTYGDLNHLVSATM(15.994915)SGVTTC(398.2529)LR.F	2541	3051	2208	3459	2350	0
	K.LTTPTYGDLNHLVSATM(15.994915)SGVTTC(398.2529)LR.F	14102	12716	14041	15224	12378	10553
	K.LTTPTYGDLNHLVSATM(15.994915)SGVTTC(398.2529)LR.F	58673	64891	59017	65207	49491	58734
	K.LTTPTYGDLNHLVSATM(15.994915)SGVTTC(398.2529)LR.F	24397	26468	24205	22617	22997	20906
	K.LTTPTYGDLNHLVSATM(15.994915)SGVTTC(398.2529)LR.F	28029	24734	25456	26475	24231	22659
	K.LTTPTYGDLNHLVSATM(15.994915)SGVTTC(398.2529)LR.F	82740	79512	83370	76870	74701	72229
	K.LTTPTYGDLNHLVSATM(15.994915)SGVTTC(398.2529)LR.F	1424	0	1641	2427	0	0
	K.LTTPTYGDLNHLVSATM(15.994915)SGVTTC(398.2529)LR.F	0	0	1808	0	0	0
	K.LTTPTYGDLNHLVSATM(15.994915)SGVTTC(398.2529)LR.F	0	1363	1892	1215	0	0
	K.LTTPTYGDLNHLVSATM(15.994915)SGVTTC(398.2529)LR.F	2595	1225	0	0	3005	3219
	K.LTTPTYGDLNHLVSATM(15.994915)SGVTTC(398.2529)LR.F	4860	1913	3873	2192	2983	3357
	K.LTTPTYGDLNHLVSATM(15.994915)SGVTTC(398.2529)LR.F	2647	1525	2546	2993	1651	1499
	K.LTTPTYGDLNHLVSATM(15.994915)SGVTTC(398.2529)LR.F	1252	1286	1597	0	0	0
	K.LTTPTYGDLNHLVSATM(15.994915)SGVTTC(398.2529)LR.F	7606	9284	6880	7199	6723	7552
	K.LTTPTYGDLNHLVSATM(15.994915)SGVTTC(398.2529)LR.F	19811	20725	19567	23464	18981	22927
	K.LTTPTYGDLNHLVSATM(15.994915)SGVTTC(398.2529)LR.F	33521	35574	30435	35753	28723	26846
	K.LTTPTYGDLNHLVSATM(15.994915)SGVTTC(398.2529)LR.F	38000	40396	30385	36534	27629	34131
	K.LTTPTYGDLNHLVSATM(15.994915)SGVTTC(398.2529)LR.F	6823	10847	6905	8818	6768	5923
	K.LTTPTYGDLNHLVSATM(15.994915)SGVTTC(398.2529)LR.F	229474	252232	237007	209959	194383	219943
	K.LTTPTYGDLNHLVSATM(15.994915)SGVTTC(398.2529)LR.F	33472	28817	31994	37066	21795	34362
	K.LTTPTYGDLNHLVSATM(15.994915)SGVTTC(398.2529)LR.F	79891	83505	78418	75526	61036	59441
	K.LTTPTYGDLNHLVSATM(15.994915)SGVTTC(398.2529)LR.F	6393	6611	6460	8308	5332	6976
	K.LTTPTYGDLNHLVSATM(15.994915)SGVTTC(398.2529)LR.F	3382	2878	2839	2817	1350	2725
	K.LTTPTYGDLNHLVSATM(15.994915)SGVTTC(398.2529)LR.F	3781	5454	4401	4208	4435	4350
	K.LTTPTYGDLNHLVSATM(15.994915)SGVTTC(398.2529)LR.F	56155	54075	52379	53746	52678	55667
	K.LTTPTYGDLNHLVSATM(15.994915)SGVTTC(398.2529)LR.F	148283	151507	152585	141942	125579	140765
	K.LTTPTYGDLNHLVSATM(15.994915)SGVTTC(398.2529)LR.F	29501	37953	26591	35624	25043	34141
	K.LTTPTYGDLNHLVSATM(15.994915)SGVTTC(398.2529)LR.F	6815	7469	3695	7512	4610	5427
	K.LTTPTYGDLNHLVSATM(15.994915)SGVTTC(398.2529)LR.F	1158	2071	0	1520	3008	1459
	K.LTTPTYGDLNHLVSATM(15.994915)SGVTTC(398.2529)LR.F	1873	3052	2719	1623	1751	1257
	K.LTTPTYGDLNHLVSATMSGVTTC(398.2529)LRFPGQLNADLR.K	13048	16164	12476	14783	12138	18397
	K.LTTPTYGDLNHLVSATMSGVTTC(398.2529)LRFPGQLNADLR.K	8770	10857	8375	10473	8643	14273
	K.LTTPTYGDLNHLVSATM(15.994915)SGVTTC(398.2529)LRFPGQLNADLR.K	1580	1511	4376	2304	1872	4617
	K.LTTPTYGDLNHLVSATM(15.994915)SGVTTC(398.2529)LRFPGQLNADLR.K	17087	18599	17900	19571	15173	22706
	K.LTTPTYGDLNHLVSATM(15.994915)SGVTTC(398.2529)LRFPGQLNADLR.K	15715	17665	13039	18853	14336	23551
	K.LTTPTYGDLNHLVSATMSGVTTC(398.2529)LRFPGQLNADLRK.L	14782	18030	18634	20130	16282	24713
	K.LTTPTYGDLNHLVSATM(15.994915)SGVTTC(398.2529)LRFPGQLNADLRK.L	19778	21057	18962	28356	24171	29429
	K.LTTPTYGDLNHLVSATM(15.994915)SGVTTC(398.2529)LRFPGQLNADLRK.L	15609	18645	18316	23157	18502	26322
	K.NMMAAC(398.2529)DPR.H	75413	87447	84197	76342	81130	76955
	K.NM(15.994915)MAAC(398.2529)DPR.H	259015	267894	279551	259492	262231	246322
	K.NM(15.994915)MAAC(398.2529)DPR.H	64647	63332	70116	67902	68907	66249
	K.NMM(15.994915)AAC(398.2529)DPR.H	137894	138662	140796	139523	132725	125478
	K.NMM(15.994915)AAC(398.2529)DPR.H	33227	33508	39965	34829	36909	36537
	K.NM(15.994915)MAAC(398.2529)DPR.H	49037	46834	44589	45307	41141	43455
	K.EVDEQM(15.994915)LNVQNK.N	2291	1864	1398	1613	0	1518
	K.TAVC(398.2529)DIPPR.G	11438	12002	13797	13869	11025	12484
	K.TAVC(398.2529)DIPPR.G	51803	50729	49613	52083	42632	47352
	K.TAVC(398.2529)DIPPR.G	72666	74294	69981	72362	64571	66950
	K.TAVC(398.2529)DIPPR.G	119427	116953	118998	114010	108715	106541
	K.TAVC(398.2529)DIPPR.G	124659	137390	122694	126263	122654	117249
	K.TAVC(398.2529)DIPPR.G	78685	85485	79036	77964	70656	68659
	K.TAVC(398.2529)DIPPR.G	50660	56825	44434	51467	42580	50227
	K.TAVC(398.2529)DIPPR.G	58189	61263	54870	56531	46768	53067
	K.TAVC(398.2529)DIPPR.G	44963	48332	49696	43286	44047	45976
	K.TAVC(398.2529)DIPPR.G	36817	41817	41530	37048	35039	36315
	K.TAVC(398.2529)DIPPR.G	35022	39549	36153	36178	34167	30923
	K.TAVC(398.2529)DIPPR.G	24873	27276	23019	26429	24235	18385
	K.TAVC(398.2529)DIPPR.G	20549	22664	19934	17625	15803	19295
	K.TAVC(398.2529)DIPPR.G	46156	52919	45450	47522	40806	43333
	K.TAVC(398.2529)DIPPR.G	212611	232110	225370	209824	196570	198969
	K.TAVC(398.2529)DIPPR.G	254383	252192	247769	244579	238143	226252
	K.TAVC(398.2529)DIPPR.G	310382	329303	332921	301245	301592	288462
	K.TAVC(398.2529)DIPPR.G	396048	415793	407608	402808	388870	372368
	K.TAVC(398.2529)DIPPR.G	454351	494030	475605	431757	440776	414304
	K.TAVC(398.2529)DIPPR.G	312454	314597	300728	311734	278829	284597
	K.TAVC(398.2529)DIPPR.G	401882	383468	396670	394296	358366	356920
	K.TAVC(398.2529)DIPPR.G	375363	384582	363781	363212	333819	357973
	K.TAVC(398.2529)DIPPR.G	302986	292939	321307	304270	294902	269677
	K.TAVC(398.2529)DIPPR.G	185114	195514	195823	167558	174386	164137
	K.TAVC(398.2529)DIPPR.G	180973	168620	170864	169066	158406	148721
	K.TAVC(398.2529)DIPPR.G	150448	151413	143495	143663	143340	119865
	K.TAVC(398.2529)DIPPR.G	110352	122882	116719	114950	106142	105557
	K.TAVC(398.2529)DIPPR.G	87509	94460	87576	83259	75006	76843
	K.TAVC(398.2529)DIPPR.G	76423	77452	84584	75799	74855	76820
	K.TAVC(398.2529)DIPPR.G	70615	77739	73312	75886	68946	69879
	K.TAVC(398.2529)DIPPR.G	28414	24341	24803	25522	21467	24308
	K.TAVC(398.2529)DIPPR.G	33719	35222	31276	33680	32533	32261
	K.TAVC(398.2529)DIPPR.G	112375	124911	120947	121981	111360	119617
	K.TAVC(398.2529)DIPPR.G	180930	177924	189347	174912	175194	169548
	K.TAVC(398.2529)DIPPR.G	154345	140646	151751	142100	143624	145964
	K.TAVC(398.2529)DIPPR.G	144917	160028	163114	154447	134988	132029
	K.TAVC(398.2529)DIPPR.G	138647	134811	138392	122560	129254	120984
	K.TAVC(398.2529)DIPPR.G	135720	142661	144750	141413	141953	131679
	K.TAVC(398.2529)DIPPR.G	89259	88968	91848	77096	81276	77384
	K.TAVC(398.2529)DIPPR.G	81556	87496	79562	78879	78205	69705
	K.TAVC(398.2529)DIPPR.G	58838	59878	64777	59208	56077	53559
	K.TAVC(398.2529)DIPPR.G	50805	58377	48003	47163	48900	41491
	K.TAVC(398.2529)DIPPR.G	44909	44511	46188	44048	43339	43758
	K.TAVC(398.2529)DIPPR.G	30637	26900	31762	23117	25140	23305
	K.TAVC(398.2529)DIPPR.G	17191	16175	22303	16126	19555	16507
	K.TAVC(398.2529)DIPPR.G	3987	2728	2934	2420	1771	2453
	K.TAVC(398.2529)DIPPR.G	5228	4847	6712	4449	5633	4316
	K.TAVC(398.2529)DIPPR.G	5238	4042	4930	3906	4836	2779
	K.TAVC(398.2529)DIPPR.G	5842	6419	5810	5643	5572	4383
	K.TAVC(398.2529)DIPPR.G	5770	4969	6622	4568	4694	4060
	K.TAVC(398.2529)DIPPR.G	81160	77806	71100	72458	68829	65044
	K.TAVC(398.2529)DIPPR.G	357509	376851	314376	327810	304157	295046
	K.TAVC(398.2529)DIPPR.G	182650	192548	181200	196602	170429	163584
	K.TAVC(398.2529)DIPPR.G	20494	23729	20566	16849	18429	20161
	K.TAVC(398.2529)DIPPR.G	45662	45108	47035	42672	39023	43372
	K.TAVC(398.2529)DIPPR.G	264188	271487	246207	251981	248638	236243
	K.TAVC(398.2529)DIPPR.G	107776	110300	105776	103397	103017	92429
	K.TAVC(398.2529)DIPPR.G	53234	55551	53893	54330	48528	55254
	K.TAVC(398.2529)DIPPR.G	63691	61075	64377	54139	54379	54689
	K.TAVC(398.2529)DIPPR.G	347626	358040	381010	358349	359226	337286
	K.TAVC(398.2529)DIPPRGLK.M	31016	36004	35840	36249	36069	48818
	K.TAVC(398.2529)DIPPRGLK.M	84260	89962	92262	91365	86522	116908
	K.TAVC(398.2529)DIPPRGLK.M	50772	59373	53781	60699	58452	76253
	K.TAVC(398.2529)DIPPRGLK.M	59300	79136	78598	78731	75082	106824
	K.TAVC(398.2529)DIPPRGLK.M	61369	69373	78855	71867	68068	86198
	K.TAVC(398.2529)DIPPRGLK.M	26109	26496	23736	26414	24496	32302
	K.TAVC(398.2529)DIPPRGLK.M	25336	25487	22494	27593	26701	29665
	K.TAVC(398.2529)DIPPRGLK.M	40592	36808	41977	45043	48366	65975
	K.TAVC(398.2529)DIPPRGLK.M	49493	56880	55282	58692	66805	64436
	K.TAVC(398.2529)DIPPRGLK.M	54947	60515	58687	63793	64511	91410
	K.TAVC(398.2529)DIPPRGLK.M	62242	61231	70360	67916	70072	88452
	K.TAVC(398.2529)DIPPRGLK.M	62776	65230	65214	73698	66316	88593
	K.TAVC(398.2529)DIPPRGLK.M	45868	61806	51800	56152	53263	78006
	K.TAVC(398.2529)DIPPRGLK.M	63983	67788	73019	71644	77530	86599
	K.TAVC(398.2529)DIPPRGLK.M	35137	40019	37123	37489	41264	47137
	K.TAVC(398.2529)DIPPRGLK.M	202658	227151	227916	250813	226653	308494
	K.TAVC(398.2529)DIPPRGLK.M	71757	81797	84031	88886	84706	115118
Q96EK6	8	0.37	20749	8	11670.1	10518.1	65034	GNPNAT1 Glucosamine 6-phosphate N-acetyltransferase [REVIEWED] ENSG00000100522;IPI00061525;Q96EK6
U	R.GRVEDVVVSDEC(398.2529)R.G	27160	24440	28699	25389	24529	29822
U	R.VEDVVVSDEC(398.2529)R.G	1403	1382	0	2059	1811	2845
U	R.VEDVVVSDEC(398.2529)R.G	2528	0	1991	1191	1984	0
U	R.VEDVVVSDEC(398.2529)R.G	2592	3023	1966	2660	1937	2157
U	R.VEDVVVSDEC(398.2529)R.G	2052	3025	1900	2693	1913	1742
U	K.KLNC(398.2529)YK.I	29997	29220	26730	29084	32182	28720
U	K.FGYTVSEENYM(15.994915)C(398.2529)R.R	7895	10197	10100	9404	12564	10757
P60174	32	0.367	30791	32	59584.1	53703.9	1292499	TPI1 Triosephosphate isomerase [REVIEWED] ENSG00000111669;IPI00797270;P60174;D3DUS9;P00938;Q6FHP9;Q6IS07;Q8WWD0;Q96AG5
U	K.QSLGELIGTLNAAKVPADTEVVC(398.2529)APPTAYIDFAR.Q	0	2305	1781	1316	2072	2411
U	K.VPADTEVVC(398.2529)APPTAYIDFAR.Q	4119	5327	4864	4410	3197	3973
U	K.VPADTEVVC(398.2529)APPTAYIDFAR.Q	14228	15553	17911	14787	17010	15473
U	K.VPADTEVVC(398.2529)APPTAYIDFAR.Q	56752	48212	50951	51488	56340	53641
U	K.VPADTEVVC(398.2529)APPTAYIDFAR.Q	24719	21676	22658	23562	25160	23448
U	K.IAVAAQNC(398.2529)YK.V	141832	127862	147474	127509	154131	134666
U	K.IAVAAQNC(398.2529)YK.V	3014	3838	4534	3862	4968	4927
U	K.IAVAAQNC(398.2529)YK.V	6746	6457	4290	3297	5114	4888
U	K.IAVAAQNC(398.2529)YK.V	838148	794924	800257	658182	705921	645582
U	K.IAVAAQNC(398.2529)YK.V	49869	41395	51919	43614	57304	52334
U	K.VTNGAFTGEISPGM(15.994915)IKDC(398.2529)GATWVVLGHSER.R	12818	9408	11140	9427	10261	8726
U	K.VTNGAFTGEISPGM(15.994915)IKDC(398.2529)GATWVVLGHSER.R	34057	28439	33988	32037	31436	29318
U	K.DC(398.2529)GATWVVLGHSER.R	4791	3292	4772	3628	3640	4039
U	K.VAHALAEGLGVIAC(398.2529)IGEK.L	13553	11622	12060	13098	11920	11814
U	K.VAHALAEGLGVIAC(398.2529)IGEK.L	55614	49527	52044	48500	47122	48614
U	K.VAHALAEGLGVIAC(398.2529)IGEK.L	19174	17396	17930	16572	18502	16834
U	K.VAHALAEGLGVIAC(398.2529)IGEK.L	12929	14629	12865	14766	13862	12236
U	R.IIYGGSVTGATC(398.2529)K.E	36468	36006	39067	39307	32002	35139
U	R.IIYGGSVTGATC(398.2529)K.E	13901	15276	14967	16405	14568	16167
U	R.IIYGGSVTGATC(398.2529)K.E	48336	48693	47924	44365	42923	42896
U	R.IIYGGSVTGATC(398.2529)K.E	104382	106405	122181	103361	96857	108803
U	R.IIYGGSVTGATC(398.2529)K.E	1598	2726	1274	888	1660	2492
U	R.IIYGGSVTGATC(398.2529)K.E	0	1221	0	0	0	1721
U	R.IIYGGSVTGATC(398.2529)K.E	0	0	0	0	0	1607
U	R.IIYGGSVTGATC(398.2529)K.E	1777	1331	1873	1603	0	1757
U	R.IIYGGSVTGATC(398.2529)K.E	1664	0	0	0	0	1270
U	R.IIYGGSVTGATC(398.2529)K.E	3219	3297	4010	2740	3020	3057
U	R.IIYGGSVTGATC(398.2529)K.E	0	0	0	1667	0	0
Q71U36	193	0.364	50136	193	58756.3	52957.7	7550001	TUBA1A Tubulin alpha-1A chain [REVIEWED] ENSG00000167552;IPI00180675;Q71U36;A8K0B8;P04687;P05209
U	R.KLADQCTGLQGFLVFHSFGGGTGSGFTSLLM(15.994915)ER.L	9115	4407	7553	6841	4898	27913
U	R.KLADQC(398.2529)TGLQGFLVFHSFGGGTGSGFTSLLM(15.994915)ER.L	13242	15694	11026	11604	10542	10805
U	R.KLADQC(398.2529)TGLQGFLVFHSFGGGTGSGFTSLLM(15.994915)ER.L	2665	2390	3400	3157	2083	2112
U	K.LADQCTGLQGFLVFHSFGGGTGSGFTSLLM(15.994915)ER.L	3211	1761	2879	2656	2965	12276
U	K.LADQC(398.2529)TGLQGFLVFHSFGGGTGSGFTSLLM(15.994915)ER.L	1699	1617	1664	3066	1722	1726
U	K.LADQC(398.2529)TGLQGFLVFHSFGGGTGSGFTSLLM(15.994915)ER.L	5505	5063	3023	4454	3995	4697
	K.AYHEQLSVAEITNAC(398.2529)FEPANQMVK.C	230710	198706	218507	260721	203620	225198
	K.AYHEQLSVAEITNAC(398.2529)FEPANQMVK.C	26275	26376	27445	28176	24560	25702
	K.AYHEQLSVAEITNAC(398.2529)FEPANQMVK.C	59273	48844	53982	54235	48984	51559
	K.AYHEQLSVAEITNAC(398.2529)FEPANQMVK.C	6729	8202	9271	9302	9534	9517
	K.AYHEQLSVAEITNAC(398.2529)FEPANQM(15.994915)VK.C	54036	53582	48044	59065	51968	50327
	K.AYHEQLSVAEITNAC(398.2529)FEPANQM(15.994915)VK.C	35465	36628	35753	40363	35110	36315
	K.AYHEQLSVAEITNAC(398.2529)FEPANQM(15.994915)VK.C	8317	8225	8173	10821	9707	9766
	K.AYHEQLSVAEITNAC(398.2529)FEPANQM(15.994915)VK.C	37219	36757	30891	33105	31817	32973
	K.AYHEQLSVAEITNAC(398.2529)FEPANQM(15.994915)VK.C	23675	21008	19845	24059	21929	18969
	K.AYHEQLSVAEITNAC(398.2529)FEPANQM(15.994915)VK.C	178083	164802	151025	179880	152540	167352
	K.AYHEQLSVAEITNAC(398.2529)FEPANQM(15.994915)VK.C	23170	22888	20082	22563	20945	24898
	K.AYHEQLSVAEITNAC(398.2529)FEPANQM(15.994915)VK.C	19253	22641	22036	23998	23936	23499
	K.AYHEQLSVAEITNAC(398.2529)FEPANQM(15.994915)VK.C	170722	154316	152679	157357	174999	166568
	N.AC(398.2529)FEPANQMVK.C	17367	16592	16440	18436	16117	20307
	N.AC(398.2529)FEPANQM(15.994915)VK.C	52999	50407	47500	56793	47689	58229
	R.HGKYMACC(398.2529)LLYR.G	105093	149500	135849	156757	171693	217412
	R.HGKYM(15.994915)AC(398.2529)CLLYR.G	0	2771	0	1016	2854	1192
	R.HGKYM(15.994915)ACC(398.2529)LLYR.G	29759	32097	28934	31403	35234	44170
	R.HGKYM(15.994915)ACC(398.2529)LLYR.G	51627	63897	59931	61112	75137	86737
	R.HGKYM(15.994915)AC(398.2529)CLLYR.G	70905	84787	80544	86195	101894	125542
	R.HGKYM(15.994915)AC(398.2529)CLLYR.G	21503	24366	22770	28202	30014	35701
	K.YMAC(398.2529)CLLYR.G	39340	47592	47774	40521	37648	45535
	K.YMACC(398.2529)LLYR.G	3306	2730	4068	4418	4638	3148
	K.YMACC(398.2529)LLYR.G	260505	304577	317675	281876	274883	268849
	K.YMAC(398.2529)CLLYR.G	30762	37419	41553	35836	36678	36084
	K.YM(15.994915)ACC(398.2529)LLYR.G	0	0	0	1244	0	0
	K.YM(15.994915)ACC(398.2529)LLYR.G	10599	12985	12017	13931	13573	12795
	K.YM(15.994915)ACC(398.2529)LLYR.G	20768	19558	22393	20038	21499	17428
	K.YM(15.994915)ACC(398.2529)LLYR.G	45657	44937	69782	49756	42535	51100
	K.YM(15.994915)AC(398.2529)CLLYR.G	79872	85043	86989	83140	82172	91334
	K.YM(15.994915)AC(398.2529)CLLYR.G	35734	31078	26936	37057	29598	36897
	K.YM(15.994915)AC(398.2529)CLLYR.G	4157	3606	5109	3022	4747	4393
	K.YM(15.994915)AC(398.2529)CLLYR.G	14912	13336	12628	14630	17597	14858
	K.YM(15.994915)AC(398.2529)CLLYR.G	7205	9628	5095	6041	8221	8130
	K.YM(15.994915)AC(398.2529)CLLYR.G	1256	0	1846	0	1333	1746
	K.YM(15.994915)AC(398.2529)CLLYR.G	992	0	0	0	0	0
	K.YM(15.994915)ACC(398.2529)LLYR.G	1210	2548	3081	3458	1832	2066
	K.YM(15.994915)AC(398.2529)CLLYR.G	2526	3292	4388	3007	2946	4533
	K.YM(15.994915)ACC(398.2529)LLYR.G	4507	4983	6037	4268	7566	5074
	K.YM(15.994915)ACC(398.2529)LLYR.G	31096	43031	47909	41054	45355	40324
	K.YMACC(398.2529)LLYRGDVVPK.D	0	3144	1946	2466	3324	1302
	K.YMACC(398.2529)LLYRGDVVPK.D	7748	7641	8001	8497	8766	9231
	K.YMACC(398.2529)LLYRGDVVPK.D	6560	6690	6756	6431	9269	8254
	K.YMAC(398.2529)CLLYRGDVVPK.D	2602	3576	3786	3376	3696	4002
	K.YMAC(398.2529)CLLYRGDVVPK.D	4605	7320	5414	7310	3989	8706
	K.YMACC(398.2529)LLYRGDVVPK.D	155856	159832	160691	189262	182964	211306
	K.YM(15.994915)AC(398.2529)CLLYRGDVVPK.D	5905	10950	6653	9437	7982	7093
	K.YM(15.994915)AC(398.2529)CLLYRGDVVPK.D	39348	42170	40586	41727	34646	41702
	K.YM(15.994915)ACC(398.2529)LLYRGDVVPK.D	74568	74953	91340	88597	85098	106238
	K.YM(15.994915)ACC(398.2529)LLYRGDVVPK.D	3537	4461	5336	3756	4400	6175
	K.YM(15.994915)AC(398.2529)CLLYRGDVVPK.D	391153	495623	445052	456360	450238	546952
	K.RTIQFVDWC(398.2529)PTGFK.V	178256	194570	184432	172604	160448	159390
	K.RTIQFVDWC(398.2529)PTGFK.V	602830	595764	658487	561360	598338	626173
	K.RTIQFVDWC(398.2529)PTGFK.V	40186	42561	42721	39215	41844	44882
	R.TIQFVDWC(398.2529)PTGFK.V	4075	3957	4698	3096	2798	4761
	R.TIQFVDWC(398.2529)PTGFK.V	1281117	1215880	1310165	1153165	1145318	1195110
	R.TIQFVDWC(398.2529)PTGFK.V	1106347	1128411	1210012	1114587	1047535	1127021
	R.TIQFVDWC(398.2529)PTGFK.V	533646	543194	565687	518985	542188	535185
	R.TIQFVDWC(398.2529)PTGFK.V	57717	64439	65227	59954	66478	63600
	R.TIQFVDWC(398.2529)PTGFK.V	8786	7111	8125	8707	10831	7411
	R.TIQFVDWC(398.2529)PTGFK.V	9046	6773	9037	5616	6361	8241
	R.TIQFVDWC(398.2529)PTGFK.V	5856	6504	6881	5522	14381	5695
	R.TIQFVDWC(398.2529)PTGFK.V	17966	21871	20667	20785	15682	17513
	R.TIQFVDWC(398.2529)PTGFK.V	0	0	0	0	1065	0
	R.TIQFVDWC(398.2529)PTGFK.V	0	0	0	1135	1518	2017
	R.TIQFVDWC(398.2529)PTGFK.V	0	2065	0	1958	1418	1289
	R.TIQFVDWC(398.2529)PTGFK.V	1698	0	0	0	1314	1532
	R.TIQFVDWC(398.2529)PTGFK.V	0	1785	0	0	0	0
	R.TIQFVDWC(398.2529)PTGFK.V	0	0	0	0	0	1229
	R.TIQFVDWC(398.2529)PTGFK.V	0	1452	0	1618	0	0
	R.TIQFVDWC(398.2529)PTGFK.V	1263	0	0	0	0	0
	R.TIQFVDWC(398.2529)PTGFK.V	4810	4659	4896	2823	4797	3724
	R.TIQFVDWC(398.2529)PTGFK.V	7563	7769	9344	8262	8665	7813
	R.TIQFVDWC(398.2529)PTGFK.V	1590	2377	2489	2793	0	1913
	R.TIQFVDWC(398.2529)PTGFK.V	6192	8689	7178	6928	7100	7562
	R.TIQFVDWC(398.2529)PTGFK.V	9224	9051	7864	8251	8579	8268
	R.TIQFVDWC(398.2529)PTGFK.V	57322	52154	52560	54789	53227	48831
	R.TIQFVDWC(398.2529)PTGFK.V	243532	239561	263399	221111	261677	218487
	R.TIQFVDWC(398.2529)PTGFK.V	11776	8907	10742	11753	11907	10737
	R.TIQFVDWC(398.2529)PTGFK.V	12864	18303	11954	15077	13301	13678
	R.TIQFVDWC(398.2529)PTGFKVGINYQPPTVVPGGDLAK.V	1488	2435	1805	2848	1592	4246
	R.TIQFVDWC(398.2529)PTGFKVGINYQPPTVVPGGDLAK.V	7294	6910	8776	9848	8390	16868
	R.TIQFVDWC(398.2529)PTGFKVGINYQPPTVVPGGDLAK.V	51795	59600	55417	64599	63799	129186
	R.AVC(398.2529)MLSNTTAIAEAWAR.L	0	0	0	1000	0	0
	R.AVC(398.2529)MLSNTTAIAEAWAR.L	7066	6749	5806	5596	5667	5393
	R.AVC(398.2529)MLSNTTAIAEAWAR.L	12168	13405	15226	11658	12444	7679
	R.AVC(398.2529)MLSNTTAIAEAWAR.L	2723	2589	2254	2231	2586	4215
	R.AVC(398.2529)MLSNTTAIAEAWAR.L	6471	4858	6168	5960	6397	6511
	R.AVC(398.2529)MLSNTTAIAEAWAR.L	79268	78398	73861	62594	78301	77908
	R.AVC(398.2529)MLSNTTAIAEAWAR.L	9633	7087	7127	10946	10735	8719
	R.AVC(398.2529)MLSNTTAIAEAWAR.L	0	0	1700	0	1668	1197
	R.AVC(398.2529)MLSNTTAIAEAWAR.L	1292	1670	0	2227	1909	1755
	R.AVC(398.2529)MLSNTTAIAEAWAR.L	3126	2014	3348	2810	1818	3639
	R.AVC(398.2529)MLSNTTAIAEAWAR.L	19903	24189	21643	26573	30007	22804
	R.AVC(398.2529)MLSNTTAIAEAWAR.L	15925	18489	18305	21141	19878	19572
	R.AVC(398.2529)MLSNTTAIAEAWAR.L	23573	23366	17142	21119	22347	19024
	R.AVC(398.2529)MLSNTTAIAEAWAR.L	15584	16220	13296	19391	16441	14079
	R.AVC(398.2529)M(15.994915)LSNTTAIAEAWAR.L	2761	0	1966	1166	1810	1746
	R.AVC(398.2529)M(15.994915)LSNTTAIAEAWAR.L	0	1693	0	1831	0	1621
	R.AVC(398.2529)M(15.994915)LSNTTAIAEAWAR.L	5834	5503	4731	5239	4152	5107
	R.AVC(398.2529)M(15.994915)LSNTTAIAEAWAR.L	11264	4871	7015	7939	7054	4754
	R.AVC(398.2529)M(15.994915)LSNTTAIAEAWAR.L	13074	12662	11334	9482	13368	11139
	R.AVC(398.2529)M(15.994915)LSNTTAIAEAWAR.L	2741	2696	1217	3141	0	0
	R.AVC(398.2529)M(15.994915)LSNTTAIAEAWAR.L	49331	52953	36186	55104	53843	45401
	R.AVC(398.2529)M(15.994915)LSNTTAIAEAWAR.L	3251	5381	3320	2857	0	0
	R.AVC(398.2529)M(15.994915)LSNTTAIAEAWAR.L	19138	0	0	0	0	0
	R.AVC(398.2529)M(15.994915)LSNTTAIAEAWAR.L	18779	17643	15701	15292	12170	16029
	R.AVC(398.2529)M(15.994915)LSNTTAIAEAWAR.L	1337	2452	0	1693	1413	1859
	R.AVC(398.2529)M(15.994915)LSNTTAIAEAWAR.L	16263	15874	16641	15056	15684	13371
	R.AVC(398.2529)M(15.994915)LSNTTAIAEAWAR.L	41482	43825	40633	43293	37738	30692
	R.AVC(398.2529)M(15.994915)LSNTTAIAEAWAR.L	2667	1516	2379	1808	2495	0
	R.AVC(398.2529)M(15.994915)LSNTTAIAEAWAR.L	1349	0	2329	1786	0	0
	R.AVC(398.2529)M(15.994915)LSNTTAIAEAWAR.L	0	0	1607	0	0	0
	R.AVC(398.2529)M(15.994915)LSNTTAIAEAWAR.L	0	0	1276	0	0	0
	R.AVC(398.2529)M(15.994915)LSNTTAIAEAWAR.L	0	0	0	1654	1098	0
	R.AVC(398.2529)M(15.994915)LSNTTAIAEAWAR.L	0	0	1410	977	0	0
	R.AVC(398.2529)M(15.994915)LSNTTAIAEAWAR.L	1656	1294	0	1216	0	0
	R.AVC(398.2529)M(15.994915)LSNTTAIAEAWAR.L	0	0	1465	0	0	0
	R.AVC(398.2529)M(15.994915)LSNTTAIAEAWAR.L	2072	3089	3063	1966	1382	2245
	R.AVC(398.2529)M(15.994915)LSNTTAIAEAWAR.L	1451	0	0	0	0	0
	R.AVC(398.2529)M(15.994915)LSNTTAIAEAWAR.L	2097	1509	1467	2665	1847	0
	R.AVC(398.2529)M(15.994915)LSNTTAIAEAWAR.L	42707	50388	41610	42153	45226	36400
	R.AVC(398.2529)M(15.994915)LSNTTAIAEAWAR.L	31105	32247	26451	31340	25191	25219
	R.AVC(398.2529)M(15.994915)LSNTTAIAEAWAR.L	68406	70739	68620	74735	76965	59971
	R.AVC(398.2529)M(15.994915)LSNTTAIAEAWAR.L	4484	3470	4439	3129	2088	2812
	R.AVC(398.2529)M(15.994915)LSNTTAIAEAWAR.L	7115	6753	6193	5505	4867	4704
	R.AVC(398.2529)M(15.994915)LSNTTAIAEAWAR.L	16778	19561	17993	17229	20441	17394
	R.AVC(398.2529)M(15.994915)LSNTTAIAEAWAR.L	8987	12173	7562	10582	11622	10579
	R.AVC(398.2529)M(15.994915)LSNTTAIAEAWAR.L	43265	51318	40918	39489	42089	31240
	R.AVC(398.2529)M(15.994915)LSNTTAIAEAWAR.L	36607	30041	32814	33968	31302	30672
	R.AVC(398.2529)M(15.994915)LSNTTAIAEAWAR.L	46513	49245	40113	46781	43091	44476
	R.AVC(398.2529)M(15.994915)LSNTTAIAEAWAR.L	196792	170607	175375	169314	168909	153971
	R.AVC(398.2529)M(15.994915)LSNTTAIAEAWAR.L	35587	28033	32383	33659	29219	31111
	R.AVC(398.2529)M(15.994915)LSNTTAIAEAWAR.L	17721	14218	15263	16152	14471	14982
	R.AVC(398.2529)M(15.994915)LSNTTAIAEAWAR.L	3690	4859	3002	5437	4551	2978
	R.AVC(398.2529)M(15.994915)LSNTTAIAEAWAR.L	4758	4868	4746	4628	6017	4966
	R.AVC(398.2529)M(15.994915)LSNTTAIAEAWAR.L	9462	8696	10068	8411	6999	7741
	R.AVC(398.2529)M(15.994915)LSNTTAIAEAWAR.L	33850	32093	32149	34007	31811	28134
	R.AVC(398.2529)M(15.994915)LSNTTAIAEAWAR.L	166306	136158	160838	142521	148549	138953
	R.AVC(398.2529)M(15.994915)LSNTTAIAEAWAR.L	25400	25357	19493	20330	25367	17248
	R.AVC(398.2529)M(15.994915)LSNTTAIAEAWAR.L	4567	4728	5854	5246	5314	5564
	R.AVC(398.2529)M(15.994915)LSNTTAIAEAWAR.L	25491	22781	25731	25271	27788	21434
	R.AVC(398.2529)M(15.994915)LSNTTAIAEAWAR.L	6349	6992	9155	6915	5442	5215
	R.AVC(398.2529)M(15.994915)LSNTTAIAEAWAR.L	2269	2713	3293	3933	2570	2787
	R.AVC(398.2529)M(15.994915)LSNTTAIAEAWAR.L	2575	1648	1534	1900	1426	2247
	R.AVC(398.2529)M(15.994915)LSNTTAIAEAWAR.L	3769	4244	4713	4184	4235	2439
	R.AVC(398.2529)M(15.994915)LSNTTAIAEAWAR.L	9550	8852	9184	6837	8958	7738
	R.LDHKFDLM(15.994915)YAK.R	99958	103651	110642	40162	66079	109288
Q8WUR7	6	0.357	13322	6	72263.3	65132	357575	C15orf40 UPF0235 protein C15orf40 [REVIEWED] ENSG00000169609;IPI01010038;Q8WUR7;A6NIC9;B2R5E7
U	K.GC(398.2529)VTIAIHAKPGSK.Q	346507	350649	312244	375418	425858	354044
U	K.QNAVTDLTAEAVNVAIAAPPSEGEANAELC(398.2529)R.Y	0	0	0	0	1311	0
U	K.QNAVTDLTAEAVNVAIAAPPSEGEANAELC(398.2529)R.Y	6943	6410	6273	6618	6129	6363
U	K.QNAVTDLTAEAVNVAIAAPPSEGEANAELC(398.2529)R.Y	10677	11683	11432	11891	9702	10734
U	K.QNAVTDLTAEAVNVAIAAPPSEGEANAELC(398.2529)R.Y	3158	3830	3761	3659	3111	4292
U	K.QNAVTDLTAEAVNVAIAAPPSEGEANAELC(398.2529)R.Y	23507	19398	23320	21989	19129	23401
P62937	27	0.352	18012	27	43722	39407	680348	PPIA Peptidyl-prolyl cis-trans isomerase A [REVIEWED] ENSG00000198618;ENSG00000196262;IPI00419585;P62937;A8K220;P05092;Q3KQW3;Q6IBU5;Q96IX3;Q9BRU4;Q9BTY9;Q9UC61
	K.GSC(398.2529)FHR.I	21837	28288	24824	24083	30999	23969
	K.GSC(398.2529)FHR.I	136382	123469	166617	134874	146355	153381
	K.GSC(398.2529)FHR.I	13472	13932	13772	16804	19003	16014
	R.IIPGFMC(398.2529)QGGDFTR.H	1596	2146	0	1813	936	2678
	R.IIPGFMC(398.2529)QGGDFTR.H	4070	1848	3742	3460	2546	1270
	R.IIPGFMC(398.2529)QGGDFTR.H	5844	6105	7520	6961	5550	5641
	R.IIPGFM(15.994915)C(398.2529)QGGDFTR.H	1475	0	0	0	0	0
	R.IIPGFM(15.994915)C(398.2529)QGGDFTR.H	975	0	0	1493	1281	1148
	R.IIPGFM(15.994915)C(398.2529)QGGDFTR.H	0	0	1597	0	0	0
	R.IIPGFM(15.994915)C(398.2529)QGGDFTR.H	22435	25576	22640	24978	20055	23524
	R.IIPGFM(15.994915)C(398.2529)QGGDFTR.H	12159	12125	14592	11695	13902	12239
U	K.HTGPGILSM(15.994915)ANAGPNTNGSQFFIC(398.2529)TAK.T	2321	1713	2713	1550	1886	1730
U	K.HTGPGILSM(15.994915)ANAGPNTNGSQFFIC(398.2529)TAK.T	57961	58616	56293	56719	57422	57734
U	K.HTGPGILSM(15.994915)ANAGPNTNGSQFFIC(398.2529)TAK.T	6880	6125	7222	6654	8501	5765
U	K.KITIADC(398.2529)GQLE.-	133130	126495	133487	138137	136369	135505
U	K.KITIADC(398.2529)GQLE.-	239666	222902	202822	216351	201622	202493
U	K.ITIADC(398.2529)GQLE.-	16495	19427	16260	16684	15679	16392
U	K.ITIADC(398.2529)GQLE.-	13531	14970	12521	13544	12813	17359
U	K.ITIADC(398.2529)GQLE.-	71390	58023	62470	56723	58743	55123
U	K.ITIADC(398.2529)GQLE.-	26521	24025	27873	25377	28611	25462
P68366	236	0.35	49924	236	118105	106449	19318352	TUBA4A Tubulin alpha-4A chain [REVIEWED] ENSG00000127824;IPI00007750;P68366;B3KNQ6;P05215
U	K.TIGGGDDSFTTFFC(398.2529)ETGAGK.H	24136	20804	20074	19844	19920	18947
U	R.KLSDQC(398.2529)TGLQGFLVFHSFGGGTGSGFTSLLM(15.994915)ER.L	17090	17193	17015	16295	17830	17562
U	R.KLSDQC(398.2529)TGLQGFLVFHSFGGGTGSGFTSLLM(15.994915)ER.L	1408	1905	4104	2474	2455	1898
U	K.LSDQC(398.2529)TGLQGFLVFHSFGGGTGSGFTSLLM(15.994915)ER.L	6750	8137	7430	6631	7252	6375
	K.AYHEQLSVAEITNAC(398.2529)FEPANQMVK.C	230710	198706	218507	260721	203620	225198
	K.AYHEQLSVAEITNAC(398.2529)FEPANQMVK.C	26275	26376	27445	28176	24560	25702
	K.AYHEQLSVAEITNAC(398.2529)FEPANQMVK.C	59273	48844	53982	54235	48984	51559
	K.AYHEQLSVAEITNAC(398.2529)FEPANQMVK.C	6729	8202	9271	9302	9534	9517
	K.AYHEQLSVAEITNAC(398.2529)FEPANQM(15.994915)VK.C	54036	53582	48044	59065	51968	50327
	K.AYHEQLSVAEITNAC(398.2529)FEPANQM(15.994915)VK.C	35465	36628	35753	40363	35110	36315
	K.AYHEQLSVAEITNAC(398.2529)FEPANQM(15.994915)VK.C	8317	8225	8173	10821	9707	9766
	K.AYHEQLSVAEITNAC(398.2529)FEPANQM(15.994915)VK.C	37219	36757	30891	33105	31817	32973
	K.AYHEQLSVAEITNAC(398.2529)FEPANQM(15.994915)VK.C	23675	21008	19845	24059	21929	18969
	K.AYHEQLSVAEITNAC(398.2529)FEPANQM(15.994915)VK.C	178083	164802	151025	179880	152540	167352
	K.AYHEQLSVAEITNAC(398.2529)FEPANQM(15.994915)VK.C	23170	22888	20082	22563	20945	24898
	K.AYHEQLSVAEITNAC(398.2529)FEPANQM(15.994915)VK.C	19253	22641	22036	23998	23936	23499
	K.AYHEQLSVAEITNAC(398.2529)FEPANQM(15.994915)VK.C	170722	154316	152679	157357	174999	166568
	N.AC(398.2529)FEPANQMVK.C	17367	16592	16440	18436	16117	20307
	N.AC(398.2529)FEPANQM(15.994915)VK.C	52999	50407	47500	56793	47689	58229
	R.HGKYMACC(398.2529)LLYR.G	105093	149500	135849	156757	171693	217412
	R.HGKYM(15.994915)AC(398.2529)CLLYR.G	0	2771	0	1016	2854	1192
	R.HGKYM(15.994915)ACC(398.2529)LLYR.G	29759	32097	28934	31403	35234	44170
	R.HGKYM(15.994915)ACC(398.2529)LLYR.G	51627	63897	59931	61112	75137	86737
	R.HGKYM(15.994915)AC(398.2529)CLLYR.G	70905	84787	80544	86195	101894	125542
	R.HGKYM(15.994915)AC(398.2529)CLLYR.G	21503	24366	22770	28202	30014	35701
	K.YMAC(398.2529)CLLYR.G	39340	47592	47774	40521	37648	45535
	K.YMACC(398.2529)LLYR.G	3306	2730	4068	4418	4638	3148
	K.YMACC(398.2529)LLYR.G	260505	304577	317675	281876	274883	268849
	K.YMAC(398.2529)CLLYR.G	30762	37419	41553	35836	36678	36084
	K.YM(15.994915)ACC(398.2529)LLYR.G	0	0	0	1244	0	0
	K.YM(15.994915)ACC(398.2529)LLYR.G	10599	12985	12017	13931	13573	12795
	K.YM(15.994915)ACC(398.2529)LLYR.G	20768	19558	22393	20038	21499	17428
	K.YM(15.994915)ACC(398.2529)LLYR.G	45657	44937	69782	49756	42535	51100
	K.YM(15.994915)AC(398.2529)CLLYR.G	79872	85043	86989	83140	82172	91334
	K.YM(15.994915)AC(398.2529)CLLYR.G	35734	31078	26936	37057	29598	36897
	K.YM(15.994915)AC(398.2529)CLLYR.G	4157	3606	5109	3022	4747	4393
	K.YM(15.994915)AC(398.2529)CLLYR.G	14912	13336	12628	14630	17597	14858
	K.YM(15.994915)AC(398.2529)CLLYR.G	7205	9628	5095	6041	8221	8130
	K.YM(15.994915)AC(398.2529)CLLYR.G	1256	0	1846	0	1333	1746
	K.YM(15.994915)AC(398.2529)CLLYR.G	992	0	0	0	0	0
	K.YM(15.994915)ACC(398.2529)LLYR.G	1210	2548	3081	3458	1832	2066
	K.YM(15.994915)AC(398.2529)CLLYR.G	2526	3292	4388	3007	2946	4533
	K.YM(15.994915)ACC(398.2529)LLYR.G	4507	4983	6037	4268	7566	5074
	K.YM(15.994915)ACC(398.2529)LLYR.G	31096	43031	47909	41054	45355	40324
	K.YMACC(398.2529)LLYRGDVVPK.D	0	3144	1946	2466	3324	1302
	K.YMACC(398.2529)LLYRGDVVPK.D	7748	7641	8001	8497	8766	9231
	K.YMACC(398.2529)LLYRGDVVPK.D	6560	6690	6756	6431	9269	8254
	K.YMAC(398.2529)CLLYRGDVVPK.D	2602	3576	3786	3376	3696	4002
	K.YMAC(398.2529)CLLYRGDVVPK.D	4605	7320	5414	7310	3989	8706
	K.YMACC(398.2529)LLYRGDVVPK.D	155856	159832	160691	189262	182964	211306
	K.YM(15.994915)AC(398.2529)CLLYRGDVVPK.D	5905	10950	6653	9437	7982	7093
	K.YM(15.994915)AC(398.2529)CLLYRGDVVPK.D	39348	42170	40586	41727	34646	41702
	K.YM(15.994915)ACC(398.2529)LLYRGDVVPK.D	74568	74953	91340	88597	85098	106238
	K.YM(15.994915)ACC(398.2529)LLYRGDVVPK.D	3537	4461	5336	3756	4400	6175
	K.YM(15.994915)AC(398.2529)CLLYRGDVVPK.D	391153	495623	445052	456360	450238	546952
U	K.TKRSIQFVDWC(398.2529)PTGFK.V	24811	27147	26517	28109	29898	22388
U	K.RSIQFVDWC(398.2529)PTGFK.V	82264	88265	90279	85315	87548	95069
U	K.RSIQFVDWC(398.2529)PTGFK.V	6792	6021	6553	6777	6026	5423
U	K.RSIQFVDWC(398.2529)PTGFK.V	837120	839484	767404	777572	791821	811957
U	K.RSIQFVDWC(398.2529)PTGFK.V	561658	601336	624439	609920	689370	655720
U	K.RSIQFVDWC(398.2529)PTGFK.V	13745	18775	16852	19136	15230	18969
U	K.RSIQFVDWC(398.2529)PTGFK.V	4121	7178	5231	4879	5085	6145
U	K.RSIQFVDWC(398.2529)PTGFK.V	190734	206866	196260	191105	190103	194325
U	K.RSIQFVDWC(398.2529)PTGFKVGINYQPPTVVPGGDLAK.V	10587	15829	12188	13471	16138	32425
U	R.SIQFVDWC(398.2529)PTGFK.V	2563889	2638330	2699308	2632186	2509936	2520388
U	R.SIQFVDWC(398.2529)PTGFK.V	2963530	3013258	3092695	2985106	2860843	3030219
U	R.SIQFVDWC(398.2529)PTGFK.V	1773494	1713897	1758697	1612122	1562458	1609567
U	R.SIQFVDWC(398.2529)PTGFK.V	1114959	1093012	1090125	1063628	1130386	1050927
U	R.SIQFVDWC(398.2529)PTGFK.V	1117261	1298032	1403786	1168935	1298890	1230320
U	R.SIQFVDWC(398.2529)PTGFK.V	292533	332682	324425	300311	326444	306762
U	R.SIQFVDWC(398.2529)PTGFK.V	143808	142593	153739	151082	147478	142687
U	R.SIQFVDWC(398.2529)PTGFK.V	20649	19768	18446	19529	19102	16580
U	R.SIQFVDWC(398.2529)PTGFK.V	9467	8012	9222	8691	6987	9353
U	R.SIQFVDWC(398.2529)PTGFK.V	6170	6450	7516	6968	6696	6973
U	R.SIQFVDWC(398.2529)PTGFK.V	6686	7160	5845	7514	12104	7893
U	R.SIQFVDWC(398.2529)PTGFK.V	8640	12220	9805	9991	18598	11101
U	R.SIQFVDWC(398.2529)PTGFK.V	25388	40689	31216	29986	57294	33508
U	R.SIQFVDWC(398.2529)PTGFK.V	2608	3801	1527	3836	2830	3435
U	R.SIQFVDWC(398.2529)PTGFK.V	1592	1564	2959	2053	1797	0
U	R.SIQFVDWC(398.2529)PTGFK.V	2667	2226	3307	2570	2742	3184
U	R.SIQFVDWC(398.2529)PTGFK.V	1532	1951	2558	2973	0	0
U	R.SIQFVDWC(398.2529)PTGFK.V	1796	1749	3417	2262	1981	1901
U	R.SIQFVDWC(398.2529)PTGFK.V	24551	26587	24376	24926	23902	22207
U	R.SIQFVDWC(398.2529)PTGFK.V	15522	15095	16868	13988	15912	15898
U	R.SIQFVDWC(398.2529)PTGFK.V	1020	0	1987	0	1349	0
U	R.SIQFVDWC(398.2529)PTGFK.V	2895	1511	2189	3183	2365	2135
U	R.SIQFVDWC(398.2529)PTGFK.V	1121	0	0	1285	1073	1302
U	R.SIQFVDWC(398.2529)PTGFK.V	0	0	0	0	1680	1147
U	R.SIQFVDWC(398.2529)PTGFK.V	2744	3238	0	2410	1719	2447
U	R.SIQFVDWC(398.2529)PTGFK.V	4712	4005	7083	4061	4456	5098
U	R.SIQFVDWC(398.2529)PTGFK.V	5890	5962	4871	6111	6991	5234
U	R.SIQFVDWC(398.2529)PTGFK.V	3488	3543	2428	2823	3782	2940
U	R.SIQFVDWC(398.2529)PTGFK.V	1048	1674	0	1331	0	0
U	R.SIQFVDWC(398.2529)PTGFK.V	17402	19066	16921	15422	21908	18524
U	R.SIQFVDWC(398.2529)PTGFK.V	48314	47412	52396	43638	43092	45178
U	R.SIQFVDWC(398.2529)PTGFK.V	11978	11499	11457	11749	11907	15053
U	R.SIQFVDWC(398.2529)PTGFK.V	6081	5825	5123	4735	5618	5799
U	R.SIQFVDWC(398.2529)PTGFK.V	14988	15676	14403	13447	12375	12755
U	R.SIQFVDWC(398.2529)PTGFK.V	2170	3201	3088	2404	2523	2498
U	R.SIQFVDWC(398.2529)PTGFK.V	8015	6327	6461	8275	9170	6916
U	R.SIQFVDWC(398.2529)PTGFK.V	3406	3937	2187	3974	3185	4961
U	R.SIQFVDWC(398.2529)PTGFK.V	36491	35955	40011	35590	37044	40809
U	R.SIQFVDWC(398.2529)PTGFK.V	16890	17130	20536	19653	16819	19324
U	R.SIQFVDWC(398.2529)PTGFK.V	321832	349733	294147	319617	292838	316421
U	R.SIQFVDWC(398.2529)PTGFK.V	330315	358338	337622	352351	323309	361768
U	R.SIQFVDWC(398.2529)PTGFK.V	54121	59007	58187	59677	55813	55696
U	R.SIQFVDWC(398.2529)PTGFK.V	82238	89772	98786	85880	80572	85476
U	R.SIQFVDWC(398.2529)PTGFK.V	37652	43023	40847	39278	55426	44516
U	R.SIQFVDWC(398.2529)PTGFK.V	36859	63576	43527	47081	110370	62363
U	R.SIQFVDWC(398.2529)PTGFK.V	21733	24799	25884	23917	27190	26277
U	R.SIQFVDWC(398.2529)PTGFK.V	178758	161322	176495	178576	174148	171942
U	R.SIQFVDWC(398.2529)PTGFK.V	21029	25555	25592	22035	21825	19944
U	R.SIQFVDWC(398.2529)PTGFK.V	12681	12253	11550	10035	10192	10223
U	R.SIQFVDWC(398.2529)PTGFK.V	14911	11707	12049	13899	13540	13239
U	R.SIQFVDWC(398.2529)PTGFK.V	2516	4275	3094	3632	3092	2516
U	R.SIQFVDWC(398.2529)PTGFK.V	7596	6440	12972	9498	6915	8365
U	R.SIQFVDWC(398.2529)PTGFK.V	43743	43550	46864	46155	45483	41015
U	R.SIQFVDWC(398.2529)PTGFK.V	2018	2520	2821	2203	2368	2380
U	R.SIQFVDWC(398.2529)PTGFK.V	3041718	3101057	3091617	2930335	2904607	2807472
U	R.SIQFVDWC(398.2529)PTGFK.V	10576	10216	10139	9942	8780	9597
U	R.SIQFVDWC(398.2529)PTGFK.V	315280	292070	349681	302027	332301	335535
U	R.SIQFVDWC(398.2529)PTGFKVGINYQPPTVVPGGDLAK.V	0	0	0	0	0	1162
U	R.SIQFVDWC(398.2529)PTGFKVGINYQPPTVVPGGDLAK.V	0	0	0	1210	0	0
U	R.SIQFVDWC(398.2529)PTGFKVGINYQPPTVVPGGDLAK.V	3747	5938	4514	6472	6669	11667
U	R.SIQFVDWC(398.2529)PTGFKVGINYQPPTVVPGGDLAK.V	3077	4035	2171	3767	3272	7394
U	R.SIQFVDWC(398.2529)PTGFKVGINYQPPTVVPGGDLAK.V	41506	52091	53191	59202	58606	134833
U	R.SIQFVDWC(398.2529)PTGFKVGINYQPPTVVPGGDLAK.V	36043	39060	40649	48029	42146	90091
U	R.SIQFVDWC(398.2529)PTGFKVGINYQPPTVVPGGDLAK.V	2338	3770	3730	3465	2392	4577
	R.AVC(398.2529)MLSNTTAIAEAWAR.L	0	0	0	1000	0	0
	R.AVC(398.2529)MLSNTTAIAEAWAR.L	7066	6749	5806	5596	5667	5393
	R.AVC(398.2529)MLSNTTAIAEAWAR.L	12168	13405	15226	11658	12444	7679
	R.AVC(398.2529)MLSNTTAIAEAWAR.L	2723	2589	2254	2231	2586	4215
	R.AVC(398.2529)MLSNTTAIAEAWAR.L	6471	4858	6168	5960	6397	6511
	R.AVC(398.2529)MLSNTTAIAEAWAR.L	79268	78398	73861	62594	78301	77908
	R.AVC(398.2529)MLSNTTAIAEAWAR.L	9633	7087	7127	10946	10735	8719
	R.AVC(398.2529)MLSNTTAIAEAWAR.L	0	0	1700	0	1668	1197
	R.AVC(398.2529)MLSNTTAIAEAWAR.L	1292	1670	0	2227	1909	1755
	R.AVC(398.2529)MLSNTTAIAEAWAR.L	3126	2014	3348	2810	1818	3639
	R.AVC(398.2529)MLSNTTAIAEAWAR.L	19903	24189	21643	26573	30007	22804
	R.AVC(398.2529)MLSNTTAIAEAWAR.L	15925	18489	18305	21141	19878	19572
	R.AVC(398.2529)MLSNTTAIAEAWAR.L	23573	23366	17142	21119	22347	19024
	R.AVC(398.2529)MLSNTTAIAEAWAR.L	15584	16220	13296	19391	16441	14079
	R.AVC(398.2529)M(15.994915)LSNTTAIAEAWAR.L	2761	0	1966	1166	1810	1746
	R.AVC(398.2529)M(15.994915)LSNTTAIAEAWAR.L	0	1693	0	1831	0	1621
	R.AVC(398.2529)M(15.994915)LSNTTAIAEAWAR.L	5834	5503	4731	5239	4152	5107
	R.AVC(398.2529)M(15.994915)LSNTTAIAEAWAR.L	11264	4871	7015	7939	7054	4754
	R.AVC(398.2529)M(15.994915)LSNTTAIAEAWAR.L	13074	12662	11334	9482	13368	11139
	R.AVC(398.2529)M(15.994915)LSNTTAIAEAWAR.L	2741	2696	1217	3141	0	0
	R.AVC(398.2529)M(15.994915)LSNTTAIAEAWAR.L	49331	52953	36186	55104	53843	45401
	R.AVC(398.2529)M(15.994915)LSNTTAIAEAWAR.L	3251	5381	3320	2857	0	0
	R.AVC(398.2529)M(15.994915)LSNTTAIAEAWAR.L	19138	0	0	0	0	0
	R.AVC(398.2529)M(15.994915)LSNTTAIAEAWAR.L	18779	17643	15701	15292	12170	16029
	R.AVC(398.2529)M(15.994915)LSNTTAIAEAWAR.L	1337	2452	0	1693	1413	1859
	R.AVC(398.2529)M(15.994915)LSNTTAIAEAWAR.L	16263	15874	16641	15056	15684	13371
	R.AVC(398.2529)M(15.994915)LSNTTAIAEAWAR.L	41482	43825	40633	43293	37738	30692
	R.AVC(398.2529)M(15.994915)LSNTTAIAEAWAR.L	2667	1516	2379	1808	2495	0
	R.AVC(398.2529)M(15.994915)LSNTTAIAEAWAR.L	1349	0	2329	1786	0	0
	R.AVC(398.2529)M(15.994915)LSNTTAIAEAWAR.L	0	0	1607	0	0	0
	R.AVC(398.2529)M(15.994915)LSNTTAIAEAWAR.L	0	0	1276	0	0	0
	R.AVC(398.2529)M(15.994915)LSNTTAIAEAWAR.L	0	0	0	1654	1098	0
	R.AVC(398.2529)M(15.994915)LSNTTAIAEAWAR.L	0	0	1410	977	0	0
	R.AVC(398.2529)M(15.994915)LSNTTAIAEAWAR.L	1656	1294	0	1216	0	0
	R.AVC(398.2529)M(15.994915)LSNTTAIAEAWAR.L	0	0	1465	0	0	0
	R.AVC(398.2529)M(15.994915)LSNTTAIAEAWAR.L	2072	3089	3063	1966	1382	2245
	R.AVC(398.2529)M(15.994915)LSNTTAIAEAWAR.L	1451	0	0	0	0	0
	R.AVC(398.2529)M(15.994915)LSNTTAIAEAWAR.L	2097	1509	1467	2665	1847	0
	R.AVC(398.2529)M(15.994915)LSNTTAIAEAWAR.L	42707	50388	41610	42153	45226	36400
	R.AVC(398.2529)M(15.994915)LSNTTAIAEAWAR.L	31105	32247	26451	31340	25191	25219
	R.AVC(398.2529)M(15.994915)LSNTTAIAEAWAR.L	68406	70739	68620	74735	76965	59971
	R.AVC(398.2529)M(15.994915)LSNTTAIAEAWAR.L	4484	3470	4439	3129	2088	2812
	R.AVC(398.2529)M(15.994915)LSNTTAIAEAWAR.L	7115	6753	6193	5505	4867	4704
	R.AVC(398.2529)M(15.994915)LSNTTAIAEAWAR.L	16778	19561	17993	17229	20441	17394
	R.AVC(398.2529)M(15.994915)LSNTTAIAEAWAR.L	8987	12173	7562	10582	11622	10579
	R.AVC(398.2529)M(15.994915)LSNTTAIAEAWAR.L	43265	51318	40918	39489	42089	31240
	R.AVC(398.2529)M(15.994915)LSNTTAIAEAWAR.L	36607	30041	32814	33968	31302	30672
	R.AVC(398.2529)M(15.994915)LSNTTAIAEAWAR.L	46513	49245	40113	46781	43091	44476
	R.AVC(398.2529)M(15.994915)LSNTTAIAEAWAR.L	196792	170607	175375	169314	168909	153971
	R.AVC(398.2529)M(15.994915)LSNTTAIAEAWAR.L	35587	28033	32383	33659	29219	31111
	R.AVC(398.2529)M(15.994915)LSNTTAIAEAWAR.L	17721	14218	15263	16152	14471	14982
	R.AVC(398.2529)M(15.994915)LSNTTAIAEAWAR.L	3690	4859	3002	5437	4551	2978
	R.AVC(398.2529)M(15.994915)LSNTTAIAEAWAR.L	4758	4868	4746	4628	6017	4966
	R.AVC(398.2529)M(15.994915)LSNTTAIAEAWAR.L	9462	8696	10068	8411	6999	7741
	R.AVC(398.2529)M(15.994915)LSNTTAIAEAWAR.L	33850	32093	32149	34007	31811	28134
	R.AVC(398.2529)M(15.994915)LSNTTAIAEAWAR.L	166306	136158	160838	142521	148549	138953
	R.AVC(398.2529)M(15.994915)LSNTTAIAEAWAR.L	25400	25357	19493	20330	25367	17248
	R.AVC(398.2529)M(15.994915)LSNTTAIAEAWAR.L	4567	4728	5854	5246	5314	5564
	R.AVC(398.2529)M(15.994915)LSNTTAIAEAWAR.L	25491	22781	25731	25271	27788	21434
	R.AVC(398.2529)M(15.994915)LSNTTAIAEAWAR.L	6349	6992	9155	6915	5442	5215
	R.AVC(398.2529)M(15.994915)LSNTTAIAEAWAR.L	2269	2713	3293	3933	2570	2787
	R.AVC(398.2529)M(15.994915)LSNTTAIAEAWAR.L	2575	1648	1534	1900	1426	2247
	R.AVC(398.2529)M(15.994915)LSNTTAIAEAWAR.L	3769	4244	4713	4184	4235	2439
	R.AVC(398.2529)M(15.994915)LSNTTAIAEAWAR.L	9550	8852	9184	6837	8958	7738
	R.LDHKFDLM(15.994915)YAK.R	99958	103651	110642	40162	66079	109288
Q9NX24	37	0.346	17201	37	43182.2	38920.5	680191	NHP2 H/ACA ribonucleoprotein complex subunit 2 [REVIEWED] ENSG00000145912;IPI00041325;Q9NX24;A6NKY8;Q9P095
U	M.TKIKADPDGPEAQAEAC(398.2529)SGER.T	177129	191360	193819	237570	211602	247843
U	M.TKIKADPDGPEAQAEAC(398.2529)SGER.T	38470	47990	45449	54738	46287	55679
U	K.IKADPDGPEAQAEAC(398.2529)SGER.T	11005	8733	9791	11176	11802	12916
U	K.IKADPDGPEAQAEAC(398.2529)SGER.T	242293	232441	259646	234788	230273	244400
U	K.IKADPDGPEAQAEAC(398.2529)SGER.T	74228	72189	61282	84381	64061	75783
U	K.IKADPDGPEAQAEAC(398.2529)SGER.T	11365	10322	11079	11590	11691	13213
U	K.IKADPDGPEAQAEAC(398.2529)SGER.T	1582	3648	3420	3580	1781	3409
U	K.IKADPDGPEAQAEAC(398.2529)SGER.T	125266	130226	101925	127875	117326	118393
U	K.ADPDGPEAQAEAC(398.2529)SGER.T	1489	0	1808	1754	0	1161
U	K.ADPDGPEAQAEAC(398.2529)SGER.T	2752	1752	2402	971	3051	2522
U	K.ADPDGPEAQAEAC(398.2529)SGER.T	0	0	0	0	1616	0
U	K.ADPDGPEAQAEAC(398.2529)SGER.T	3737	3597	3295	3018	2927	1840
U	K.ADPDGPEAQAEAC(398.2529)SGER.T	6253	3961	5878	5757	5499	5871
U	K.ADPDGPEAQAEAC(398.2529)SGER.T	0	0	0	1470	0	0
U	K.ADPDGPEAQAEAC(398.2529)SGER.T	2902	2208	3806	3092	1303	1896
U	D.PDGPEAQAEAC(398.2529)SGER.T	9452	8298	9784	12389	11162	8435
U	D.PDGPEAQAEAC(398.2529)SGER.T	4784	4816	5693	5931	4797	4052
U	D.GPEAQAEAC(398.2529)SGER.T	3997	2534	4629	5385	4080	3468
U	K.RPTC(398.2529)VIM(15.994915)VKPHEEYQEAYDECLEEVQSLPLPL.-	22786	21538	18119	23950	27393	20334
O00483	5	0.346	9370	5	29432.8	26528	126047	NDUFA4 NADH dehydrogenase [ubiquinone] 1 alpha subcomplex subunit 4 [REVIEWED] ENSG00000189043;IPI00011770;O00483;A4D109;Q6FHN5
U	R.LALFNPDVC(398.2529)WDR.N	6337	8195	7612	5720	8942	7526
U	R.LALFNPDVC(398.2529)WDR.N	44653	45154	35224	35045	40029	35128
U	R.LALFNPDVC(398.2529)WDR.N	25609	23820	26823	21640	23773	26759
U	R.LALFNPDVC(398.2529)WDRNNPEPWNK.L	52038	56439	46011	42115	40973	43053
U	R.LALFNPDVC(398.2529)WDRNNPEPWNKLGPNDQYK.F	4003	4562	4643	3001	3711	6855
P30050	15	0.345	17819	15	36660.9	33042.6	388151	RPL12 60S ribosomal protein L12 [REVIEWED] ENSG00000197958;IPI00816063;P30050;Q5VVV2;Q6PB27
U	R.C(398.2529)TGGEVGATSALAPK.I	2231	2201	2304	2627	2952	1638
U	R.C(398.2529)TGGEVGATSALAPK.I	117943	120058	124592	115229	131981	112809
U	R.C(398.2529)TGGEVGATSALAPK.I	64713	62998	78193	69880	81879	72459
U	R.ELSGTIKEILGTAQSVGC(398.2529)NVDGR.H	98021	79542	85053	89390	97064	82619
U	R.ELSGTIKEILGTAQSVGC(398.2529)NVDGR.H	46044	44035	43247	43367	42847	41406
U	R.ELSGTIKEILGTAQSVGC(398.2529)NVDGR.H	22116	18972	21218	19996	19606	20247
U	K.EILGTAQSVGC(398.2529)NVDGR.H	30542	23905	27974	20576	25173	20693
U	K.EILGTAQSVGC(398.2529)NVDGRHPHDIIDDINSGAVECPAS.-	0	0	0	1918	1639	0
U	K.EILGTAQSVGCNVDGRHPHDIIDDINSGAVEC(398.2529)PAS.-	3806	2558	3153	3789	4940	3599
U	K.EILGTAQSVGCNVDGRHPHDIIDDINSGAVEC(398.2529)PAS.-	5866	6543	8143	6302	7110	5387
U	R.HPHDIIDDINSGAVEC(398.2529)PAS.-	36735	36577	28034	30709	38042	28027
U	R.HPHDIIDDINSGAVEC(398.2529)PAS.-	6302	5654	5387	3922	6413	5424
U	R.HPHDIIDDINSGAVEC(398.2529)PAS.-	6067	5658	7399	6829	6441	5356
U	R.HPHDIIDDINSGAVEC(398.2529)PAS.-	22211	16782	15915	22224	23425	15256
Q8WXD5	15	0.341	18824	15	88603.8	79859.7	913294	GEMIN6 Gem-associated protein 6 [REVIEWED] ENSG00000152147;IPI00103087;Q8WXD5;B2RDP8;Q53SI5;Q8WVB4;Q9H5G6
U	R.EKLM(15.994915)HLFTSGDC(398.2529)K.A	213591	220894	227012	236968	247819	239097
U	R.EKLM(15.994915)HLFTSGDC(398.2529)K.A	255558	280206	273696	295159	269207	273100
U	R.EKLM(15.994915)HLFTSGDC(398.2529)K.A	51176	40133	37536	41181	48965	45151
U	K.LMHLFTSGDC(398.2529)K.A	39916	41283	39503	35380	37602	41502
U	K.LM(15.994915)HLFTSGDC(398.2529)K.A	86093	81765	76563	82985	79851	88822
U	K.LM(15.994915)HLFTSGDC(398.2529)K.A	146987	160017	150167	144651	148237	164552
U	K.LM(15.994915)HLFTSGDC(398.2529)K.A	49018	54672	45232	43751	46364	47353
U	K.LM(15.994915)HLFTSGDC(398.2529)K.A	85762	94241	92199	92798	92024	97360
U	K.LM(15.994915)HLFTSGDCKAYSPEDLEERKNSLK.K	0	0	0	0	0	1462
U	R.TLC(398.2529)VAGVLTIDPPYGPENCSSSNEIILSR.V	6402	6248	5464	6309	5465	4041
U	R.TLC(398.2529)VAGVLTIDPPYGPENCSSSNEIILSR.V	10307	9135	8714	10017	9632	9898
U	R.TLCVAGVLTIDPPYGPENC(398.2529)SSSNEIILSR.V	13506	12550	15318	13143	14788	17617
Q96C90	8	0.34	15911	8	1694	1526.5	5097	PPP1R14B Protein phosphatase 1 regulatory subunit 14B [REVIEWED] ENSG00000173457;IPI00398922;Q96C90;Q504S7;Q7KZD7
U	R.LYDC(398.2529)QEEEIPELEIDVDELLDM(15.994915)ESDDAR.A	1393	0	0	0	0	0
U	R.LYDC(398.2529)QEEEIPELEIDVDELLDM(15.994915)ESDDAR.A	0	0	1726	1330	2079	0
U	R.LYDC(398.2529)QEEEIPELEIDVDELLDM(15.994915)ESDDAR.A	1789	2363	2815	2374	1320	2266
U	R.VKELLVDC(398.2529)YKPTEAFISGLLDK.I	2924	3223	5207	3030	2688	4501
P49458	22	0.337	10112	22	77213.6	69593.6	1363141	SRP9 Signal recognition particle 9 kDa protein [REVIEWED] ENSG00000143742;IPI00642816;P49458;A8K0N0;Q6NVX0;Q8WTW0
U	R.HSDGNLC(398.2529)VK.V	280281	276115	272007	268028	288526	267599
U	R.HSDGNLC(398.2529)VK.V	23708	27774	24372	27609	28289	24777
U	R.HSDGNLC(398.2529)VK.V	227120	204164	219952	213906	260978	201320
U	K.VTDDLVC(398.2529)LVYK.T	87442	82895	82986	88004	75415	79388
U	K.VTDDLVC(398.2529)LVYK.T	25892	22536	22937	25446	23760	22460
U	K.VTDDLVC(398.2529)LVYK.T	56194	54690	49280	51239	44667	42520
U	K.VTDDLVC(398.2529)LVYK.T	183204	183764	179187	187203	171948	168811
[truncated: 41,079 more rows]

## Sheet: 10 µM 21-SLF site engagement
Accession	Site	Description	Engagement%	R value
P78417	C32	Glutathione S-transferase omega-1	90	10
Q9H7Z7	C110	Prostaglandin E synthase 2	89	9.09091
P62760	C187	Visinin-like protein 1	83	5.88235
O14880	C62	Microsomal glutathione S-transferase 3	82	5.55556
P30519	C282	Heme oxygenase 2	77.4086	4.42647
P30519	C265	Heme oxygenase 2	76.3333	4.22535
Q07065	C100	Cytoskeleton-associated protein 4	48.505	1.94194
P22307	C100	Non-specific lipid-transfer protein	45	1.81818
Q9NXB0	C141	Meckel syndrome type 1 protein	40.6667	1.68539
Q86UL3	C325	Glycerol-3-phosphate acyltransferase 4	37.4582	1.59893
P49189	C484	4-trimethylaminobutyraldehyde dehydrogenase	37.2093	1.59259
Q9Y3T6	C242	R3H and coiled-coil domain-containing protein 1	37	1.5873
Q9UM19	C187	Hippocalcin-like protein 4	36	1.5625
Q9BQF6	C221	Sentrin-specific protease 7	36	1.5625
O43772	C283	Mitochondrial carnitine/acylcarnitine carrier proteinMitochondrial carnitine/acylcarnitine carrier prot...	36	1.5625
Q5T7M9	C6	Protein FAM69A	35.6667	1.5544
P16615	C997	Sarcoplasmic/endoplasmic reticulum calcium ATPase 2Sarcoplasmic/endoplasmic reticulum calcium ATPase ...	32.6667	1.48515
Q01658	C43	Protein Dr1	32	1.47059
O95881	C66	Thioredoxin domain-containing protein 12	31.5615	1.46117
Q5T6F2	C208	Ubiquitin-associated protein 2	30.5648	1.44019
Q8TCY9	C466	Up-regulator of cell proliferation	30.3333	1.43541
O15118	C816	Niemann-Pick C1 protein	30	1.42857
O15228	C54	Dihydroxyacetone phosphate acyltransferase	29.9003	1.42654
Q9P2B7	C504	UPF0501 protein KIAA1430	29.7659	1.42381
P07711	C135	Cathepsin L1	28.3333	1.39535
Q9Y285	C493	Phenylalanine--tRNA ligase alpha subunit	28.3333	1.39535
P27707	C59	Deoxycytidine kinase	27.4247	1.37788
Q04695	C40	Keratin, type I cytoskeletal 17	26	1.35135
Q8TBC3	C121	SH3KBP1-binding protein 1	25.6667	1.34529
P98160	C892	Basement membrane-specific heparan sulfate proteoglycan core proteinBasement membrane-specific heparan sulfate proteog...	25.6667	1.34529
Q6UX07	C174	Dehydrogenase/reductase SDR family member 13	25	1.33333
Q04695	C358	Keratin, type I cytoskeletal 17	25	1.33333
Q8IXQ3	C22	Uncharacterized protein C9orf40	24.4147	1.32301
Q6P587	C129	Acylpyruvase FAHD1, mitochondrial	24.3333	1.32159
P23610	C110	Factor VIII intron 22 protein	24	1.31579
Q9BX69	C643	Caspase recruitment domain-containing protein 6	23.6667	1.31004
P22307	C71	Non-specific lipid-transfer protein	23.6667	1.31004
P42704	C500	Leucine-rich PPR motif-containing protein, mitochondrialLeucine-rich PPR motif-containing protein, mitocho...	23.2558	1.30303
Q9BQS8	C737	FYVE and coiled-coil domain-containing protein 1	23.2558	1.30303
Q9BQS8	C1110	FYVE and coiled-coil domain-containing protein 1	22.0736	1.28326
P68402	C188	Platelet-activating factor acetylhydrolase IB subunit betaPlatelet-activating factor acetylhydrolase IB subu...	22	1.28205
Q9Y5N6	C35	Origin recognition complex subunit 6	22	1.28205
Q9HAH7	C356	Probable fibrosin-1	21.7391	1.27778
P37268	C6	Squalene synthase	21.6667	1.2766
Q68CP9	C1244	AT-rich interactive domain-containing protein 2	21.4047	1.27234
P52209	C422	6-phosphogluconate dehydrogenase, decarboxylating	21.4047	1.27234
Q3SXM5	C265	Inactive hydroxysteroid dehydrogenase-like protein 1Inactive hydroxysteroid dehydrogenase-like protein...	21.3333	1.27119
O60884	C280	DnaJ homolog subfamily A member 2	21.3333	1.27119
Q6NXE6	C297	Armadillo repeat-containing protein 6	21.3333	1.27119
P42702	C90	Leukemia inhibitory factor receptor	21	1.26582
P49591	C300	Serine--tRNA ligase, cytoplasmic	20.9302	1.26471
Q7Z6Z7	C3375	E3 ubiquitin-protein ligase HUWE1	20.3333	1.25523
Q9Y2X7	C235	ARF GTPase-activating protein GIT1	20	1.25
Q9Y5Z7	C673	Host cell factor 2	20	1.25
Q8NHY2	C91	E3 ubiquitin-protein ligase RFWD2	20	1.25
Q9H7D7	C338	WD repeat-containing protein 26	19.9336	1.24896
O95382	C16	Mitogen-activated protein kinase kinase kinase 6	19.6667	1.24481
Q86V97	C63	Kelch repeat and BTB domain-containing protein 6	19.6667	1.24481
Q9UL41	C130	Paraneoplastic antigen Ma3	19.3333	1.23967
Q9NY33	C654	Dipeptidyl peptidase 3	19.3333	1.23967
Q9NSE4	C819	Isoleucine--tRNA ligase, mitochondrial	19.0635	1.23554
O60333	C356	Kinesin-like protein KIF1B	19	1.23457
P50336	C183	Protoporphyrinogen oxidase	18.9369	1.23361
Q9Y5A7	C51	NEDD8 ultimate buster 1	18.6667	1.22951
Q6NUM9	C547	All-trans-retinol 13,14-reductase	18.6047	1.22857
Q14118	C713	Dystroglycan	18.3333	1.22449
Q92834	C440	X-linked retinitis pigmentosa GTPase regulator	18.2724	1.22358
Q7KYR7	C448	Butyrophilin subfamily 2 member A1	18.2724	1.22358
Q93009	C727	Ubiquitin carboxyl-terminal hydrolase 7	18.2724	1.22358
Q16850	C449	Lanosterol 14-alpha demethylase	18.0602	1.22041
O00401	C115	Neural Wiskott-Aldrich syndrome protein	18	1.21951
Q6ZV89	C253	SH2 domain-containing protein 5	18	1.21951
P13489	C362	Ribonuclease inhibitor	18	1.21951
O75531	C77	Barrier-to-autointegration factor	18	1.21951
Q9P1Z2	C57	Calcium-binding and coiled-coil domain-containing protein 1Calcium-binding and coiled-coil domain-containing ...	17.6667	1.21457
Q9UK61	C952	Protein FAM208A	17.6667	1.21457
A6NDU8	C179	UPF0600 protein C5orf51	17.3333	1.20968
P49207	C46	60S ribosomal protein L34	17.2757	1.20884
Q00796	C301	Sorbitol dehydrogenase	17.0569	1.20565
Q15005	C17	Signal peptidase complex subunit 2	17	1.20482
Q15005	C26	Signal peptidase complex subunit 2	17	1.20482
Q96FS4	C755	Signal-induced proliferation-associated protein 1	17	1.20482
O43542	C86	DNA repair protein XRCC3	17	1.20482
P08758	C316	Annexin A5	16.7224	1.2008
P29401	C386	Transketolase	16.6667	1.2
Q15370	C89	Transcription elongation factor B polypeptide 2	16.6667	1.2
Q969H6	C96	Ribonuclease P/MRP protein subunit POP5	16.6667	1.2
Q9BXW9	C310	Fanconi anemia group D2 protein	16.6113	1.1992
P82663	C141	28S ribosomal protein S25, mitochondrial	16.3333	1.19522
Q8TF30	C179	WASP homolog-associated protein with actin, membranes and microtubulesWASP homolog-associated protein with actin, membra...	16	1.19048
P48059	C219	LIM and senescent cell antigen-like-containing domain protein 1LIM and senescent cell antigen-like-containing dom...	16	1.19048
Q9Y2T2	C29	AP-3 complex subunit mu-1	16	1.19048
Q8NB14	C432	Ubiquitin carboxyl-terminal hydrolase 38	16	1.19048
Q8WY54	C534	Protein phosphatase 1E	16	1.19048
O15371	C264	Eukaryotic translation initiation factor 3 subunit DEukaryotic translation initiation factor 3 subunit...	15.6667	1.18577
P50579	C448	Methionine aminopeptidase 2	15.6667	1.18577
O75140	C477	DEP domain-containing protein 5	15.6667	1.18577
Q96DI7	C99	U5 small nuclear ribonucleoprotein 40 kDa protein	15.6667	1.18577
Q13444	C571	Disintegrin and metalloproteinase domain-containing protein 15Disintegrin and metalloproteinase domain-containin...	15.6146	1.18504
Q92542	C140	Nicastrin	15.3846	1.18182
Q5SU54	C111	HLA class II histocompatibility antigen, DQ beta 1 chainHLA class II histocompatibility antigen, DQ beta 1...	15.3333	1.1811
P37837	C250	Transaldolase	15.3333	1.1811
Q5W0B1	C277	RING finger protein 219	15.3333	1.1811
Q9UPP1	C844	Histone lysine demethylase PHF8	15.3333	1.1811
P50995	C294	Annexin A11	15.2824	1.18039
Q9UPY3	C1535	Endoribonuclease Dicer	15	1.17647
Q9H089	C191	Large subunit GTPase 1 homolog	15	1.17647
O95801	C238	Tetratricopeptide repeat protein 4	15	1.17647
P26368	C442	Splicing factor U2AF 65 kDa subunit	15	1.17647
P50748	C683	Kinetochore-associated protein 1	15	1.17647
Q13029	C819	PR domain zinc finger protein 2	15	1.17647
Q9H6R7	C125	WD repeat-containing protein C2orf44	14.6667	1.17188
Q6P1M0	C391	Long-chain fatty acid transport protein 4	14.6667	1.17188
Q8TF39	C421	Zinc finger protein 483	14.6667	1.17188
Q15398	C801	Disks large-associated protein 5	14.6667	1.17188
Q92696	C99	Geranylgeranyl transferase type-2 subunit alpha	14.6667	1.17188
P35556	C149	Fibrillin-2	14.3333	1.16732
Q05086	C198	Ubiquitin-protein ligase E3A	14.3333	1.16732
Q9C0C9	C244	Ubiquitin-conjugating enzyme E2 O	14.3333	1.16732
O96019	C423	Actin-like protein 6A	14.3333	1.16732
Q7Z2W4	C518	Zinc finger CCCH-type antiviral protein 1	14.3333	1.16732
Q8NC56	C261	LEM domain-containing protein 2	14.2857	1.16667
Q8N465	C286	D-2-hydroxyglutarate dehydrogenase, mitochondrial	14.2857	1.16667
P46777	C62	60S ribosomal protein L5	14.0468	1.16342
Q8NFS9	C146	N-acetyllactosaminide beta-1,6-N-acetylglucosaminyl-transferase, isoform CN-acetyllactosaminide beta-1,6-N-acetylglucosaminy...	14	1.16279
Q9Y4F5	C1570	Protein KIAA0284	14	1.16279
O15397	C749	Importin-8	14	1.16279
O95373	C749	Importin-7	14	1.16279
Q8WUM4	C90	Programmed cell death 6-interacting protein	14	1.16279
Q86X95	C10	Corepressor interacting with RBPJ 1	13.9535	1.16216
Q8WZ82	C64	Ovarian cancer-associated gene 2 protein	13.9535	1.16216
Q9Y6E0	C375	Serine/threonine-protein kinase 24	13.6667	1.1583
Q13772	C55	Nuclear receptor coactivator 4	13.6667	1.1583
O14867	C557	Transcription regulator protein BACH1	13.6667	1.1583
Q9UNK9	C27	Protein angel homolog 1	13.6213	1.15769
P49588	C152	Alanine--tRNA ligase, cytoplasmic	13.3333	1.15385
Q8IXB1	C161	DnaJ homolog subfamily C member 10	13.3333	1.15385
Q9Y3I0	C193	tRNA-splicing ligase RtcB homolog	13.3333	1.15385
P62714	C20	Serine/threonine-protein phosphatase 2A catalytic subunit beta isoformSerine/threonine-protein phosphatase 2A catalytic ...	13.3333	1.15385
P37268	C374	Squalene synthase	13.3333	1.15385
Q8TB52	C725	F-box only protein 30	13.3333	1.15385
Q9BY32	C74	Inosine triphosphate pyrophosphatase	13.3333	1.15385
P07437	C127	Tubulin beta chain	13.289	1.15326
P68371	C127	Tubulin beta-4B chain	13.289	1.15326
Q14997	C1001	Proteasome activator complex subunit 4	13	1.14943
Q07864	C1076	DNA polymerase epsilon catalytic subunit A	13	1.14943
P49411	C222	Elongation factor Tu, mitochondrial	13	1.14943
P05556	C267	Integrin beta-1	13	1.14943
Q09161	C36	Nuclear cap-binding protein subunit 1	13	1.14943
Q8WZ82	C152	Ovarian cancer-associated gene 2 protein	12.9568	1.14885
O76074	C68	cGMP-specific 3',5'-cyclic phosphodiesterase	12.709	1.14559
Q9HAV4	C1044	Exportin-5	12.6667	1.14504
Q8IWB1	C228	Inositol 1,4,5-trisphosphate receptor-interacting proteinInositol 1,4,5-trisphosphate receptor-interacting ...	12.6667	1.14504
P27694	C323	Replication protein A 70 kDa DNA-binding subunit	12.6667	1.14504
P14618	C423	Pyruvate kinase isozymes M1/M2	12.6667	1.14504
Q6XQN6	C48	Nicotinate phosphoribosyltransferase	12.6667	1.14504
P54277	C552	PMS1 protein homolog 1	12.6667	1.14504
Q00535	C94	Cyclin-dependent kinase 5	12.6667	1.14504
Q53HC9	C95	Protein TSSC1	12.6667	1.14504
Q8NDZ2	C216	Uncharacterized protein C5orf25	12.6246	1.14449
P51553	C236	Isocitrate dehydrogenase [NAD] subunit gamma, mitochondrial [REVIEWED] ENSG00000067829;IPI00220150;P51553;Q9BUU5Isocitrate dehydrogenase [NAD] subunit gamma, mito...	12.6246	1.14449
Q9BRR6	C40	ADP-dependent glucokinase	12.6246	1.14449
Q5VZL5	C561	Zinc finger MYM-type protein 4	12.6246	1.14449
P62072	C50	Mitochondrial import inner membrane translocase subunit Tim10Mitochondrial import inner membrane translocase su...	12.3746	1.14122
Q8NE62	C105	Choline dehydrogenase, mitochondrial	12.3333	1.14068
Q9Y4K1	C1448	Absent in melanoma 1 protein	12.3333	1.14068
Q9UN30	C276	Sex comb on midleg-like protein 1	12.3333	1.14068
Q9UNK9	C345	Protein angel homolog 1	12.3333	1.14068
Q16850	C402	Lanosterol 14-alpha demethylase	12.3333	1.14068
Q8NEM2	C612	SHC SH2 domain-binding protein 1	12.3333	1.14068
Q9P0J6	C92	39S ribosomal protein L36, mitochondrial	12.3333	1.14068
A1L0T0	C315	Acetolactate synthase-like protein	12.2924	1.14015
Q96G46	C315	tRNA-dihydrouridine(47) synthase [NAD(P)(+)]-like [REVIEWED] ENSG00000141994;IPI00784107;Q96G46;Q96HM5;Q9BSU4;Q9H877;Q9NPR1tRNA-dihydrouridine(47) synthase [NAD(P)(+)]-like ...	12.2924	1.14015
Q12770	C755	Sterol regulatory element-binding protein cleavage-activating proteinSterol regulatory element-binding protein cleavage...	12.2924	1.14015
Q5TFE4	C125	5'-nucleotidase domain-containing protein 1	12.0401	1.13688
O14578	C402	Citron Rho-interacting kinase	12.0401	1.13688
Q04637	C1265	Eukaryotic translation initiation factor 4 gamma 1	12	1.13636
P02765	C132	Alpha-2-HS-glycoprotein	12	1.13636
Q6PL24	C161	Protein TMED8	12	1.13636
Q9UGU0	C1641	Transcription factor 20	12	1.13636
Q8WYQ9	C362	Zinc finger CCHC domain-containing protein 14	12	1.13636
O43293	C451	Death-associated protein kinase 3	12	1.13636
O43365	C71	Homeobox protein Hox-A3	12	1.13636
Q96EE3	C77	Nucleoporin SEH1	12	1.13636
O95382	C803	Mitogen-activated protein kinase kinase kinase 6	12	1.13636
Q5VZ89	C975	DENN domain-containing protein 4C	12	1.13636
Q9H4A5	C70	Golgi phosphoprotein 3-like	11.7057	1.13258
Q9NS18	C153	Glutaredoxin-2, mitochondrial	11.6667	1.13208
P21580	C158	Tumor necrosis factor alpha-induced protein 3	11.6667	1.13208
P62714	C202	Serine/threonine-protein phosphatase 2A catalytic subunit beta isoformSerine/threonine-protein phosphatase 2A catalytic ...	11.6667	1.13208
P67775	C202	Serine/threonine-protein phosphatase 2A catalytic subunit alpha isoformSerine/threonine-protein phosphatase 2A catalytic ...	11.6667	1.13208
Q9NX61	C33	Transmembrane protein 161A	11.6667	1.13208
Q9NZD8	C44	Maspardin	11.6667	1.13208
B0V043	C927	Valyl-tRNA synthetase	11.6667	1.13208
P63151	C262	Serine/threonine-protein phosphatase 2A 55 kDa regulatory subunit B alpha isoformSerine/threonine-protein phosphatase 2A 55 kDa reg...	11.3712	1.1283
P43355	C92	Melanoma-associated antigen 1	11.3712	1.1283
Q8WZA9	C158	Immunity-related GTPase family Q protein	11.3333	1.12782
Q06210	C2	Glucosamine--fructose-6-phosphate aminotransferase [isomerizing] 1 [REVIEWED] ENSG00000198380;IPI00299506;Q06210;Q53QE6;Q9BXF8Glucosamine--fructose-6-phosphate aminotransferase...	11.3333	1.12782
Q96FW1	C218	Ubiquitin thioesterase OTUB1	11.3333	1.12782
O76003	C229	Glutaredoxin-3	11.3333	1.12782
O95433	C301	Activator of 90 kDa heat shock protein ATPase homolog 1Activator of 90 kDa heat shock protein ATPase homo...	11.3333	1.12782
O96005	C308	Cleft lip and palate transmembrane protein 1	11.3333	1.12782
Q6PGQ7	C526	Protein aurora borealis	11.3333	1.12782
P57772	C55	Selenocysteine-specific elongation factor	11.3333	1.12782
Q9H910	C118	Hematological and neurological expressed 1-like proteinHematological and neurological expressed 1-like pr...	11.2957	1.12734
Q8IWV7	C180	E3 ubiquitin-protein ligase UBR1	11.2957	1.12734
Q96GX2	C75	Putative ataxin-7-like protein 3B	11.2957	1.12734
Q86SZ2	C123	Trafficking protein particle complex subunit 6B	11.0368	1.12406
Q9NXN4	C348	Ganglioside-induced differentiation-associated protein 2Ganglioside-induced differentiation-associated pro...	11.0368	1.12406
P15927	C49	Replication protein A 32 kDa subunit	11.0368	1.12406
Q9P0V9	C100	Septin-10	11	1.1236
Q15393	C1156	Splicing factor 3B subunit 3	11	1.1236
Q92545	C1188	Transmembrane protein 131	11	1.1236
Q9UKK3	C1494	Poly [ADP-ribose] polymerase 4 [REVIEWED] ENSG00000102699;IPI00296909;Q9UKK3;O75903;Q14682;Q5QNZ9;Q9H1M6Poly [ADP-ribose] polymerase 4 [REVIEWED] ENSG0000...	11	1.1236
Q96TA2	C193	ATP-dependent zinc metalloprotease YME1L1	11	1.1236
Q709C8	C2159	Vacuolar protein sorting-associated protein 13C	11	1.1236
Q8TEB1	C460	DDB1- and CUL4-associated factor 11	11	1.1236
Q9H0A0	C499	N-acetyltransferase 10	11	1.1236
Q9BV44	C505	THUMP domain-containing protein 3	11	1.1236
Q14574	C814	Desmocollin-3	11	1.1236
Q02487	C819	Desmocollin-2	11	1.1236
P05141	C129	ADP/ATP translocase 2	10.9635	1.12313
P12235	C129	ADP/ATP translocase 1	10.9635	1.12313
P12236	C129	ADP/ATP translocase 3	10.9635	1.12313
Q6P2P2	C175	Putative protein arginine N-methyltransferase 10	10.9635	1.12313
Q96N21	C287	AP-4 complex accessory subunit tepsin	10.9635	1.12313
Q96BP3	C180	Peptidylprolyl isomerase domain and WD repeat-containing protein 1Peptidylprolyl isomerase domain and WD repeat-cont...	10.7023	1.11985
P27695	C296	DNA-(apurinic or apyrimidinic site) lyase	10.7023	1.11985
O14929	C120	Histone acetyltransferase type B catalytic subunit	10.6667	1.1194
Q7Z2W9	C124	39S ribosomal protein L21, mitochondrial	10.6667	1.1194
P06756	C185	Integrin alpha-V	10.6667	1.1194
Q8TAF3	C225	WD repeat-containing protein 48	10.6667	1.1194
Q99543	C240	DnaJ homolog subfamily C member 2	10.6667	1.1194
O43159	C317	Ribosomal RNA-processing protein 8	10.6667	1.1194
P30153	C335	Serine/threonine-protein phosphatase 2A 65 kDa regulatory subunit A alpha isoformSerine/threonine-protein phosphatase 2A 65 kDa reg...	10.6667	1.1194
P55268	C47	Laminin subunit beta-2	10.6667	1.1194
Q99941	C95	Cyclic AMP-dependent transcription factor ATF-6 betaCyclic AMP-dependent transcription factor ATF-6 be...	10.6667	1.1194
O43175	C234	D-3-phosphoglycerate dehydrogenase	10.6312	1.11896
O95373	C96	Importin-7	10.6312	1.11896
Q6ZRI6	C174	Uncharacterized protein C15orf39	10.3679	1.11567
Q13642	C188	Four and a half LIM domains protein 1	10.3679	1.11567
P34932	C245	Heat shock 70 kDa protein 4	10.3679	1.11567
Q8TD30	C265	Alanine aminotransferase 2	10.3679	1.11567
Q9Y5N6	C88	Origin recognition complex subunit 6	10.3679	1.11567
Q71U36	C129	Tubulin alpha-1A chain	10.3333	1.11524
P45985	C158	Dual specificity mitogen-activated protein kinase kinase 4Dual specificity mitogen-activated protein kinase ...	10.3333	1.11524
A6NE09	C163	Protein RPSAP58	10.3333	1.11524
Q15120	C191	[Pyruvate dehydrogenase [lipoamide]] kinase isozyme 3, mitochondrial [REVIEWED] ENSG00000067992;IPI00915357;Q15120;B4DXG6[Pyruvate dehydrogenase [lipoamide]] kinase isozym...	10.3333	1.11524
Q9NR46	C267	Endophilin-B2	10.3333	1.11524
Q9NR09	C2910	Baculoviral IAP repeat-containing protein 6	10.3333	1.11524
O95081	C30	Arf-GAP domain and FG repeat-containing protein 2	10.3333	1.11524
P49792	C3221	E3 SUMO-protein ligase RanBP2	10.3333	1.11524
P06733	C389	Alpha-enolase	10.3333	1.11524
O00629	C417	Importin subunit alpha-4	10.3333	1.11524
Q9Y450	C491	HBS1-like protein	10.3333	1.11524
P23921	C544	Ribonucleoside-diphosphate reductase large subunit	10.3333	1.11524
Q9Y5P4	C65	Collagen type IV alpha-3-binding protein	10.3333	1.11524
Q9BQ52	C670	Zinc phosphodiesterase ELAC protein 2	10.3333	1.11524
Q6PJG6	C673	BRCA1-associated ATM activator 1	10.3333	1.11524
Q9Y6V7	C73	Probable ATP-dependent RNA helicase DDX49	10.3333	1.11524
Q93100	C923	Phosphorylase b kinase regulatory subunit beta	10.3333	1.11524
Q8N122	C960	Regulatory-associated protein of mTOR	10.3333	1.11524
O76094	C128	Signal recognition particle 72 kDa protein	10.299	1.11481
P63244	C286	Guanine nucleotide-binding protein subunit beta-2-like 1Guanine nucleotide-binding protein subunit beta-2-...	10.299	1.11481
O15067	C831	Phosphoribosylformylglycinamidine synthase	10.299	1.11481
Q92973	C103	Transportin-1	10	1.11111
Q6WKZ4	C1192	Rab11 family-interacting protein 1	10	1.11111
P09668	C138	Pro-cathepsin H	10	1.11111
P51452	C171	Dual specificity protein phosphatase 3	10	1.11111
O14976	C190	Cyclin-G-associated kinase	10	1.11111
Q6P1R4	C265	tRNA-dihydrouridine(16/17) synthase [NAD(P)(+)]-like [REVIEWED] ENSG00000169718;IPI00335251;Q6P1R4;A6NHV4;Q96AI3tRNA-dihydrouridine(16/17) synthase [NAD(P)(+)]-li...	10	1.11111
Q8TAF3	C350	WD repeat-containing protein 48	10	1.11111
O60281	C377	Zinc finger protein 292	10	1.11111
P48643	C383	T-complex protein 1 subunit epsilon	10	1.11111
Q9NZJ7	C385	Mitochondrial carrier homolog 1	10	1.11111
Q15758	C39	Neutral amino acid transporter B(0)	10	1.11111
P43246	C404	DNA mismatch repair protein Msh2	10	1.11111
P52209	C428	6-phosphogluconate dehydrogenase, decarboxylating	10	1.11111
Q8NEM0	C444	Microcephalin	10	1.11111
P86790	C471	Vacuolar fusion protein CCZ1 homolog B	10	1.11111
P42695	C637	Condensin-2 complex subunit D3	10	1.11111
Q5T0N5	C69	Formin-binding protein 1-like	10	1.11111
Q14135	C93	Transcription cofactor vestigial-like protein 4	10	1.11111
Q01813	C112	6-phosphofructokinase type C	9.96678	1.1107
O96028	C294	Probable histone-lysine N-methyltransferase NSD2	9.96678	1.1107
O75820	C610	Zinc finger protein 189	9.96678	1.1107
P11172	C255	Uridine 5'-monophosphate synthase	9.699	1.10741
Q86W56	C603	Poly(ADP-ribose) glycohydrolase	9.699	1.10741
P00558	C108	Phosphoglycerate kinase 1	9.66667	1.10701
P49366	C142	Deoxyhypusine synthase	9.66667	1.10701
Q5VV67	C1615	Peroxisome proliferator-activated receptor gamma coactivator-related protein 1Peroxisome proliferator-activated receptor gamma c...	9.66667	1.10701
P61981	C194	14-3-3 protein gamma	9.66667	1.10701
Q96BN8	C23	Protein FAM105B	9.66667	1.10701
Q9UQ49	C242	Sialidase-3	9.66667	1.10701
P51617	C302	Interleukin-1 receptor-associated kinase 1	9.66667	1.10701
Q12815	C38	Tastin	9.66667	1.10701
Q14964	C41	Ras-related protein Rab-39A	9.66667	1.10701
Q8TD10	C51	Mirror-image polydactyly gene 1 protein	9.66667	1.10701
Q6PIJ6	C791	F-box only protein 38	9.66667	1.10701
Q05084	C85	Islet cell autoantigen 1	9.66667	1.10701
Q8TB72	C857	Pumilio homolog 2	9.66667	1.10701
Q16186	C88	Proteasomal ubiquitin receptor ADRM1	9.66667	1.10701
Q14671	C977	Pumilio homolog 1	9.66667	1.10701
P62888	C52	60S ribosomal protein L30	9.63455	1.10662
P78312	C106	Protein FAM193A	9.36455	1.10332
Q9C0B7	C15	Transmembrane and coiled-coil domain-containing protein 7Transmembrane and coiled-coil domain-containing pr...	9.36455	1.10332
Q9UGK8	C157	Secretion-regulating guanine nucleotide exchange factorSecretion-regulating guanine nucleotide exchange f...	9.36455	1.10332
Q969M7	C116	NEDD8-conjugating enzyme UBE2F	9.33333	1.10294
Q9HDC9	C149	Adipocyte plasma membrane-associated protein	9.33333	1.10294
Q96R06	C177	Sperm-associated antigen 5	9.33333	1.10294
Q3KRA9	C204	Probable alpha-ketoglutarate-dependent dioxygenase ABH6Probable alpha-ketoglutarate-dependent dioxygenase...	9.33333	1.10294
O75600	C225	2-amino-3-ketobutyrate coenzyme A ligase, mitochondrial2-amino-3-ketobutyrate coenzyme A ligase, mitochon...	9.33333	1.10294
P48147	C255	Prolyl endopeptidase	9.33333	1.10294
P62495	C302	Eukaryotic peptide chain release factor subunit 1	9.33333	1.10294
Q6P3S6	C302	F-box only protein 42	9.33333	1.10294
Q9BY44	C366	Eukaryotic translation initiation factor 2A	9.33333	1.10294
Q8NBS9	C381	Thioredoxin domain-containing protein 5	9.33333	1.10294
Q9NXH9	C639	tRNA (guanine(26)-N(2))-dimethyltransferase	9.33333	1.10294
Q08J23	C678	tRNA (cytosine(34)-C(5))-methyltransferase	9.33333	1.10294
O60232	C70	Sjoegren syndrome/scleroderma autoantigen 1	9.33333	1.10294
Q9Y3B2	C73	Exosome complex component CSL4	9.33333	1.10294
Q6XZF7	C75	Dynamin-binding protein	9.33333	1.10294
Q9NPI7	C104	Lysine-rich coiled-coil protein 1	9.30233	1.10256
Q9UNW1	C232	Multiple inositol polyphosphate phosphatase 1	9.30233	1.10256
Q8IZT6	C1171	Abnormal spindle-like microcephaly-associated proteinAbnormal spindle-like microcephaly-associated prot...	9.0301	1.09926
Q86X76	C203	Nitrilase homolog 1	9	1.0989
P34896	C204	Serine hydroxymethyltransferase, cytosolic	9	1.0989
P61978	C205	Heterogeneous nuclear ribonucleoprotein K	9	1.0989
P54578	C257	Ubiquitin carboxyl-terminal hydrolase 14	9	1.0989
Q6PIW4	C26	Fidgetin-like protein 1	9	1.0989
Q02790	C334	Peptidyl-prolyl cis-trans isomerase FKBP4	9	1.0989
P10599	C35	Thioredoxin	9	1.0989
Q9Y696	C35	Chloride intracellular channel protein 4	9	1.0989
Q16822	C431	Phosphoenolpyruvate carboxykinase [GTP], mitochondrial [REVIEWED] ENSG00000100889;IPI00797038;Q16822;O43253;Q86U01;Q9BV62Phosphoenolpyruvate carboxykinase [GTP], mitochond...	9	1.0989
Q8TCG1	C472	Protein CIP2A	9	1.0989
Q92618	C610	Zinc finger protein 516	9	1.0989
Q9ULD9	C65	Zinc finger protein 608	9	1.0989
Q9HCE7	C752	E3 ubiquitin-protein ligase SMURF1	9	1.0989
P11802	C84	Cyclin-dependent kinase 4	9	1.0989
O43379	C707	WD repeat-containing protein 62	8.9701	1.09854
Q14204	C3389	Cytoplasmic dynein 1 heavy chain 1	8.69565	1.09524
Q99999	C390	Galactosylceramide sulfotransferase	8.69565	1.09524
O15228	C66	Dihydroxyacetone phosphate acyltransferase	8.69565	1.09524
O95163	C1025	Elongator complex protein 1	8.66667	1.09489
Q562E7	C130	WD repeat-containing protein 81	8.66667	1.09489
Q9HC38	C197	Glyoxalase domain-containing protein 4	8.66667	1.09489
Q9NWU1	C415	3-oxoacyl-[acyl-carrier-protein] synthase, mitochondrial [REVIEWED] ENSG00000151093;IPI00922369;Q9NWU13-oxoacyl-[acyl-carrier-protein] synthase, mitocho...	8.66667	1.09489
Q5XG87	C440	DNA polymerase sigma	8.66667	1.09489
Q9H1P3	C476	Oxysterol-binding protein-related protein 2	8.66667	1.09489
Q08999	C635	Retinoblastoma-like protein 2	8.66667	1.09489
O43592	C650	Exportin-T	8.66667	1.09489
A6QL63	C844	Ankyrin repeat and BTB/POZ domain-containing protein BTBD11Ankyrin repeat and BTB/POZ domain-containing prote...	8.66667	1.09489
Q5TCX8	C859	Mitogen-activated protein kinase kinase kinase MLK4Mitogen-activated protein kinase kinase kinase MLK...	8.66667	1.09489
O95235	C866	Kinesin-like protein KIF20A	8.66667	1.09489
E9PC75	C919	Protein RGNEF	8.66667	1.09489
Q6ZRI6	C97	Uncharacterized protein C15orf39	8.66667	1.09489
O94986	C1627	Centrosomal protein of 152 kDa	8.63787	1.09455
Q9Y4P3	C246	Transducin beta-like protein 2	8.63787	1.09455
Q9BR11	C427	Zinc finger SWIM domain-containing protein 1	8.63787	1.09455
Q15334	C697	Lethal(2) giant larvae protein homolog 1	8.63787	1.09455
Q86UE8	C172	Serine/threonine-protein kinase tousled-like 2	8.3612	1.09124
P35998	C389	26S protease regulatory subunit 7	8.3612	1.09124
P31629	C641	Transcription factor HIVEP2	8.3612	1.09124
Q6W2J9	C1016	BCL-6 corepressor	8.33333	1.09091
P00441	C147	Superoxide dismutase [Cu-Zn] [REVIEWED] ENSG00000142168;IPI00218733;P00441;A6NHJ0;D3DSE4;Q16669;Q16711;Q16838;Q16839;Q16840;Q6NR85Superoxide dismutase [Cu-Zn] [REVIEWED] ENSG000001...	8.33333	1.09091
Q9UKK3	C1499	Poly [ADP-ribose] polymerase 4 [REVIEWED] ENSG00000102699;IPI00296909;Q9UKK3;O75903;Q14682;Q5QNZ9;Q9H1M6Poly [ADP-ribose] polymerase 4 [REVIEWED] ENSG0000...	8.33333	1.09091
O60830	C17	Mitochondrial import inner membrane translocase subunit Tim17-BMitochondrial import inner membrane translocase su...	8.33333	1.09091
P30153	C174	Serine/threonine-protein phosphatase 2A 65 kDa regulatory subunit A alpha isoformSerine/threonine-protein phosphatase 2A 65 kDa reg...	8.33333	1.09091
Q8TF76	C219	Serine/threonine-protein kinase haspin	8.33333	1.09091
Q96CU9	C239	FAD-dependent oxidoreductase domain-containing protein 1FAD-dependent oxidoreductase domain-containing pro...	8.33333	1.09091
Q9UQM7	C289	Calcium/calmodulin-dependent protein kinase type II subunit alphaCalcium/calmodulin-dependent protein kinase type I...	8.33333	1.09091
O94806	C29	Serine/threonine-protein kinase D3	8.33333	1.09091
Q13557	C290	Calcium/calmodulin-dependent protein kinase type II subunit deltaCalcium/calmodulin-dependent protein kinase type I...	8.33333	1.09091
Q9H1B7	C298	Interferon regulatory factor 2-binding protein-likeInterferon regulatory factor 2-binding protein-lik...	8.33333	1.09091
P09874	C304	Poly [ADP-ribose] polymerase 1 [REVIEWED] ENSG00000143799;IPI00449049;P09874;B1ANJ4;Q8IUZ9Poly [ADP-ribose] polymerase 1 [REVIEWED] ENSG0000...	8.33333	1.09091
Q7L5Y1	C330	Mitochondrial enolase superfamily member 1	8.33333	1.09091
Q9BXW9	C342	Fanconi anemia group D2 protein	8.33333	1.09091
Q02790	C396	Peptidyl-prolyl cis-trans isomerase FKBP4	8.33333	1.09091
Q9H1P3	C402	Oxysterol-binding protein-related protein 2	8.33333	1.09091
Q6WRX3	C428	Protein zyg-11 homolog A	8.33333	1.09091
P11413	C446	Glucose-6-phosphate 1-dehydrogenase	8.33333	1.09091
P14618	C474	Pyruvate kinase isozymes M1/M2	8.33333	1.09091
Q92499	C571	ATP-dependent RNA helicase DDX1	8.33333	1.09091
Q9H078	C572	Caseinolytic peptidase B protein homolog	8.33333	1.09091
Q96ME1	C613	F-box/LRR-repeat protein 18	8.33333	1.09091
Q5VVJ2	C822	Histone H2A deubiquitinase MYSM1	8.33333	1.09091
O75179	C906	Ankyrin repeat domain-containing protein 17	8.33333	1.09091
O94973	C932	AP-2 complex subunit alpha-2	8.33333	1.09091
Q13554	C13	Calcium/calmodulin-dependent protein kinase type II subunit betaCalcium/calmodulin-dependent protein kinase type I...	8.30565	1.09058
Q9C0B9	C305	Zinc finger CCHC domain-containing protein 2	8.30565	1.09058
Q9P253	C806	Vacuolar protein sorting-associated protein 18 homologVacuolar protein sorting-associated protein 18 hom...	8.30565	1.09058
P62258	C97	14-3-3 protein epsilon	8.30565	1.09058
Q9BVQ7	C691	Spermatogenesis-associated protein 5-like protein 1Spermatogenesis-associated protein 5-like protein ...	8.02676	1.08727
P35221	C772	Catenin alpha-1	8.02676	1.08727
Q9Y3D0	C158	Mitotic spindle-associated MMXD complex subunit MIP18Mitotic spindle-associated MMXD complex subunit MI...	8	1.08696
Q5JTD0	C196	Tight junction-associated protein 1	8	1.08696
Q9Y6W3	C197	Calpain-7	8	1.08696
Q9UPN4	C218	5-azacytidine-induced protein 1	8	1.08696
P63244	C240	Guanine nucleotide-binding protein subunit beta-2-like 1Guanine nucleotide-binding protein subunit beta-2-...	8	1.08696
Q8N6R0	C273	Methyltransferase-like protein 13	8	1.08696
P22314	C278	Ubiquitin-like modifier-activating enzyme 1	8	1.08696
Q99567	C391	Nuclear pore complex protein Nup88	8	1.08696
O75083	C438	WD repeat-containing protein 1	8	1.08696
Q9BXP5	C490	Serrate RNA effector molecule homolog	8	1.08696
P10620	C50	Microsomal glutathione S-transferase 1	8	1.08696
O14647	C500	Chromodomain-helicase-DNA-binding protein 2	8	1.08696
O00203	C507	AP-3 complex subunit beta-1	8	1.08696
Q99614	C8	Tetratricopeptide repeat protein 1	8	1.08696
Q9Y281	C80	Cofilin-2	8	1.08696
Q96F86	C91	Enhancer of mRNA-decapping protein 3	8	1.08696
Q9UJ83	C307	2-hydroxyacyl-CoA lyase 1	7.97342	1.08664
Q8NFG4	C335	Folliculin	7.97342	1.08664
Q9NY74	C536	Ewing's tumor-associated antigen 1	7.97342	1.08664
P84085	C62	ADP-ribosylation factor 5	7.97342	1.08664
Q96EM0	C39	Trans-L-3-hydroxyproline dehydratase	7.69231	1.08333
Q86VP6	C1153	Cullin-associated NEDD8-dissociated protein 1	7.66667	1.08303
Q9Y4C2	C144	Protein FAM115A	7.66667	1.08303
Q9UQ80	C149	Proliferation-associated protein 2G4	7.66667	1.08303
Q13112	C191	Chromatin assembly factor 1 subunit B	7.66667	1.08303
Q9Y6A5	C20	Transforming acidic coiled-coil-containing protein 3Transforming acidic coiled-coil-containing protein...	7.66667	1.08303
Q9Y4F5	C217	Protein KIAA0284	7.66667	1.08303
Q8NBA8	C220	DTW domain-containing protein 2	7.66667	1.08303
P53396	C229	ATP-citrate synthase	7.66667	1.08303
Q9UKF6	C27	Cleavage and polyadenylation specificity factor subunit 3Cleavage and polyadenylation specificity factor su...	7.66667	1.08303
Q9UGP4	C305	LIM domain-containing protein 1	7.66667	1.08303
Q9H063	C34	Repressor of RNA polymerase III transcription MAF1 homologRepressor of RNA polymerase III transcription MAF1...	7.66667	1.08303
Q99832	C345	T-complex protein 1 subunit eta	7.66667	1.08303
O14656	C44	Torsin-1A	7.66667	1.08303
Q5T9A4	C467	ATPase family AAA domain-containing protein 3B	7.66667	1.08303
Q5T8P6	C53	RNA-binding protein 26	7.66667	1.08303
Q3SY69	C558	Mitochondrial 10-formyltetrahydrofolate dehydrogenaseMitochondrial 10-formyltetrahydrofolate dehydrogen...	7.66667	1.08303
Q96RU2	C581	Ubiquitin carboxyl-terminal hydrolase 28	7.66667	1.08303
O94782	C71	Ubiquitin carboxyl-terminal hydrolase 1	7.66667	1.08303
P28331	C75	NADH-ubiquinone oxidoreductase 75 kDa subunit, mitochondrialNADH-ubiquinone oxidoreductase 75 kDa subunit, mit...	7.66667	1.08303
Q09472	C1177	Histone acetyltransferase p300	7.6412	1.08273
P61247	C139	40S ribosomal protein S3a	7.6412	1.08273
Q6ZRI6	C139	Uncharacterized protein C15orf39	7.6412	1.08273
O96011	C159	Peroxisomal membrane protein 11B	7.6412	1.08273
Q9NZA1	C191	Chloride intracellular channel protein 5	7.6412	1.08273
Q7Z5K2	C293	Wings apart-like protein homolog	7.6412	1.08273
Q8WYP5	C313	Protein ELYS	7.6412	1.08273
O75592	C3354	Probable E3 ubiquitin-protein ligase MYCBP2	7.6412	1.08273
P68543	C51	UBX domain-containing protein 2A	7.6412	1.08273
Q14683	C619	Structural maintenance of chromosomes protein 1A	7.6412	1.08273
O15027	C1273	Protein transport protein Sec16A	7.35786	1.07942
Q7Z5J4	C1400	Retinoic acid-induced protein 1	7.35786	1.07942
P62701	C181	40S ribosomal protein S4, X isoform	7.35786	1.07942
Q9Y320	C186	Thioredoxin-related transmembrane protein 2	7.35786	1.07942
O14972	C243	Down syndrome critical region protein 3	7.35786	1.07942
Q9UPQ3	C417	Arf-GAP with GTPase, ANK repeat and PH domain-containing protein 1Arf-GAP with GTPase, ANK repeat and PH domain-cont...	7.35786	1.07942
P41091	C101	Eukaryotic translation initiation factor 2 subunit 3Eukaryotic translation initiation factor 2 subunit...	7.33333	1.07914
Q96EK9	C103	Protein KTI12 homolog	7.33333	1.07914
P52701	C1117	DNA mismatch repair protein Msh6	7.33333	1.07914
P55145	C117	Mesencephalic astrocyte-derived neurotrophic factorMesencephalic astrocyte-derived neurotrophic facto...	7.33333	1.07914
P60891	C165	Ribose-phosphate pyrophosphokinase 1	7.33333	1.07914
P48634	C1821	Protein PRRC2A	7.33333	1.07914
P84074	C185	Neuron-specific calcium-binding protein hippocalcinNeuron-specific calcium-binding protein hippocalci...	7.33333	1.07914
Q14406	C196	Chorionic somatomammotropin hormone-like 1	7.33333	1.07914
Q86VP6	C237	Cullin-associated NEDD8-dissociated protein 1	7.33333	1.07914
Q49A88	C297	Coiled-coil domain-containing protein 14	7.33333	1.07914
O95757	C376	Heat shock 70 kDa protein 4L	7.33333	1.07914
P34932	C376	Heat shock 70 kDa protein 4	7.33333	1.07914
Q92598	C376	Heat shock protein 105 kDa	7.33333	1.07914
P57678	C382	Gem-associated protein 4	7.33333	1.07914
P08243	C44	Asparagine synthetase [glutamine-hydrolyzing] [REVIEWED] ENSG00000070669;IPI00554777;P08243;A4D1I8;D6W5R3;P08184;Q15666;Q549T9;Q96HD0Asparagine synthetase [glutamine-hydrolyzing] [REV...	7.33333	1.07914
Q8N0X7	C499	Spartin	7.33333	1.07914
Q9UGP4	C521	LIM domain-containing protein 1	7.33333	1.07914
P20936	C576	Ras GTPase-activating protein 1	7.33333	1.07914
Q13191	C607	E3 ubiquitin-protein ligase CBL-B	7.33333	1.07914
Q8IZL8	C645	Proline-, glutamic acid- and leucine-rich protein 1Proline-, glutamic acid- and leucine-rich protein ...	7.33333	1.07914
Q8ND82	C671	Zinc finger protein 280C	7.33333	1.07914
Q6N043	C676	Zinc finger protein 280D	7.33333	1.07914
Q9H892	C676	Tetratricopeptide repeat protein 12	7.33333	1.07914
Q99426	C83	Tubulin-folding cofactor B	7.33333	1.07914
P46379	C856	Large proline-rich protein BAG6	7.33333	1.07914
Q5THK1	C1137	Protein PRR14L	7.30897	1.07885
Q9UBT2	C173	SUMO-activating enzyme subunit 2	7.30897	1.07885
Q9UBN6	C326	Tumor necrosis factor receptor superfamily member 10DTumor necrosis factor receptor superfamily member ...	7.30897	1.07885
Q15042	C693	Rab3 GTPase-activating protein catalytic subunit	7.30897	1.07885
O00217	C121	NADH dehydrogenase [ubiquinone] iron-sulfur protein 8, mitochondrial [REVIEWED] ENSG00000110717;IPI00010845;O00217;B2RB86;Q0VDA8NADH dehydrogenase [ubiquinone] iron-sulfur protei...	7.02341	1.07554
Q14181	C392	DNA polymerase alpha subunit B	7.02341	1.07554
Q99575	C559	Ribonucleases P/MRP protein subunit POP1	7.02341	1.07554
Q01469	C67	Fatty acid-binding protein, epidermal	7.02341	1.07554
Q5VWN6	C739	Protein FAM208B	7.02341	1.07554
Q16584	C828	Mitogen-activated protein kinase kinase kinase 11	7.02341	1.07554
Q9P212	C106	1-phosphatidylinositol 4,5-bisphosphate phosphodiesterase epsilon-11-phosphatidylinositol 4,5-bisphosphate phosphodie...	7	1.07527
P25789	C107	Proteasome subunit alpha type-4	7	1.07527
Q9NQC3	C1101	Reticulon-4	7	1.07527
P30566	C113	Adenylosuccinate lyase	7	1.07527
Q8NG31	C1233	Protein CASC5	7	1.07527
Q05655	C127	Protein kinase C delta type	7	1.07527
Q86WR0	C150	Coiled-coil domain-containing protein 25	7	1.07527
Q15572	C162	TATA box-binding protein-associated factor RNA polymerase I subunit CTATA box-binding protein-associated factor RNA pol...	7	1.07527
P35270	C171	Sepiapterin reductase	7	1.07527
P49327	C212	Fatty acid synthase	7	1.07527
Q02224	C2297	Centromere-associated protein E	7	1.07527
Q15181	C254	Inorganic pyrophosphatase	7	1.07527
Q96EB6	C326	NAD-dependent protein deacetylase sirtuin-1	7	1.07527
Q02086	C384	Transcription factor Sp2	7	1.07527
P56282	C403	DNA polymerase epsilon subunit 2	7	1.07527
Q6NUM9	C534	All-trans-retinol 13,14-reductase	7	1.07527
Q6IPR3	C70	tRNA wybutosine-synthesizing protein 3 homolog	7	1.07527
Q9H6R7	C713	WD repeat-containing protein C2orf44	7	1.07527
Q3SY69	C728	Mitochondrial 10-formyltetrahydrofolate dehydrogenaseMitochondrial 10-formyltetrahydrofolate dehydrogen...	7	1.07527
Q9BUH6	C80	Uncharacterized protein C9orf142	7	1.07527
Q16658	C89	Fascin	7	1.07527
P63104	C94	14-3-3 protein zeta/delta	7	1.07527
O60318	C1377	80 kDa MCM3-associated protein	6.97674	1.075
O95149	C199	Snurportin-1	6.97674	1.075
Q63HK3	C367	Zinc finger protein with KRAB and SCAN domains 2	6.97674	1.075
P42704	C394	Leucine-rich PPR motif-containing protein, mitochondrialLeucine-rich PPR motif-containing protein, mitocho...	6.97674	1.075
Q9Y3P9	C476	Rab GTPase-activating protein 1	6.97674	1.075
Q53ET0	C515	CREB-regulated transcription coactivator 2	6.97674	1.075
Q8TEX9	C95	Importin-4	6.97674	1.075
P02765	C230	Alpha-2-HS-glycoprotein	6.68896	1.07168
O60566	C775	Mitotic checkpoint serine/threonine-protein kinase BUB1 betaMitotic checkpoint serine/threonine-protein kinase...	6.68896	1.07168
P35610	C92	Sterol O-acyltransferase 1	6.68896	1.07168
Q9NWS1	C121	PCNA-interacting partner	6.66667	1.07143
P78527	C123	DNA-dependent protein kinase catalytic subunit	6.66667	1.07143
Q15643	C1299	Thyroid receptor-interacting protein 11	6.66667	1.07143
P30086	C133	Phosphatidylethanolamine-binding protein 1	6.66667	1.07143
P39748	C141	Flap endonuclease 1	6.66667	1.07143
P49327	C1459	Fatty acid synthase	6.66667	1.07143
Q9BXI3	C167	Cytosolic 5'-nucleotidase 1A	6.66667	1.07143
Q9NVP2	C189	Histone chaperone ASF1B	6.66667	1.07143
P46821	C2088	Microtubule-associated protein 1B	6.66667	1.07143
Q9P287	C213	BRCA2 and CDKN1A-interacting protein	6.66667	1.07143
Q8IV48	C243	3'-5' exoribonuclease 1	6.66667	1.07143
P45985	C246	Dual specificity mitogen-activated protein kinase kinase 4Dual specificity mitogen-activated protein kinase ...	6.66667	1.07143
O43175	C254	D-3-phosphoglycerate dehydrogenase	6.66667	1.07143
Q15008	C266	26S proteasome non-ATPase regulatory subunit 6	6.66667	1.07143
Q16222	C268	UDP-N-acetylhexosamine pyrophosphorylase	6.66667	1.07143
O00410	C354	Importin-5	6.66667	1.07143
O60308	C445	Centrosomal protein of 104 kDa	6.66667	1.07143
O43175	C48	D-3-phosphoglycerate dehydrogenase	6.66667	1.07143
P06132	C65	Uroporphyrinogen decarboxylase	6.66667	1.07143
Q7Z4H7	C662	HAUS augmin-like complex subunit 6	6.66667	1.07143
Q8TD16	C754	Protein bicaudal D homolog 2	6.66667	1.07143
P25786	C92	Proteasome subunit alpha type-1	6.66667	1.07143
Q9ULT8	C936	E3 ubiquitin-protein ligase HECTD1	6.66667	1.07143
Q9UIA9	C244	Exportin-7	6.64452	1.07117
P35520	C370	Cystathionine beta-synthase	6.64452	1.07117
Q12906	C116	Interleukin enhancer-binding factor 3	6.35452	1.06786
P06865	C522	Beta-hexosaminidase subunit alpha	6.35452	1.06786
P26639	C107	Threonine--tRNA ligase, cytoplasmic	6.33333	1.06762
Q14679	C1174	Tubulin polyglutamylase TTLL4	6.33333	1.06762
Q9H1P3	C122	Oxysterol-binding protein-related protein 2	6.33333	1.06762
Q92625	C217	Ankyrin repeat and SAM domain-containing protein 1AAnkyrin repeat and SAM domain-containing protein 1...	6.33333	1.06762
Q5SW79	C235	Centrosomal protein of 170 kDa	6.33333	1.06762
Q04726	C26	Transducin-like enhancer protein 3	6.33333	1.06762
Q9Y5A7	C270	NEDD8 ultimate buster 1	6.33333	1.06762
Q9UBP9	C302	PTB domain-containing engulfment adapter protein 1	6.33333	1.06762
Q15797	C310	Mothers against decapentaplegic homolog 1	6.33333	1.06762
Q15796	C312	Mothers against decapentaplegic homolog 2	6.33333	1.06762
O95801	C321	Tetratricopeptide repeat protein 4	6.33333	1.06762
Q16850	C345	Lanosterol 14-alpha demethylase	6.33333	1.06762
Q96P11	C359	Putative methyltransferase NSUN5	6.33333	1.06762
O00429	C361	Dynamin-1-like protein	6.33333	1.06762
Q9C0C9	C375	Ubiquitin-conjugating enzyme E2 O	6.33333	1.06762
Q12834	C388	Cell division cycle protein 20 homolog	6.33333	1.06762
O14757	C408	Serine/threonine-protein kinase Chk1	6.33333	1.06762
Q9BRS8	C416	La-related protein 6	6.33333	1.06762
Q15654	C47	Thyroid receptor-interacting protein 6	6.33333	1.06762
O94901	C526	SUN domain-containing protein 1	6.33333	1.06762
Q9Y4A5	C567	Transformation/transcription domain-associated proteinTransformation/transcription domain-associated pro...	6.33333	1.06762
P04183	C66	Thymidine kinase, cytosolic	6.33333	1.06762
Q96CD2	C7	Phosphopantothenoylcysteine decarboxylase	6.33333	1.06762
P62913	C72	60S ribosomal protein L11	6.33333	1.06762
Q6P2E9	C81	Enhancer of mRNA-decapping protein 4	6.33333	1.06762
Q9H4L7	C861	SWI/SNF-related matrix-associated actin-dependent regulator of chromatin subfamily A containing DEAD/H box 1SWI/SNF-related matrix-associated actin-dependent ...	6.33333	1.06762
P61599	C9	N-alpha-acetyltransferase 20	6.33333	1.06762
Q9BYC9	C93	39S ribosomal protein L20, mitochondrial	6.33333	1.06762
Q8IZT6	C95	Abnormal spindle-like microcephaly-associated proteinAbnormal spindle-like microcephaly-associated prot...	6.33333	1.06762
P14618	C152	Pyruvate kinase isozymes M1/M2	6.31229	1.06738
P35219	C266	Carbonic anhydrase-related protein	6.31229	1.06738
P57737	C691	Coronin-7	6.31229	1.06738
P50990	C136	T-complex protein 1 subunit theta	6.02007	1.06406
Q9NPH2	C235	Inositol-3-phosphate synthase 1	6.02007	1.06406
Q9Y2X0	C30	Mediator of RNA polymerase II transcription subunit 16Mediator of RNA polymerase II transcription subuni...	6.02007	1.06406
Q9Y5B9	C574	FACT complex subunit SPT16	6.02007	1.06406
Q08379	C833	Golgin subfamily A member 2	6.02007	1.06406
O75643	C1127	U5 small nuclear ribonucleoprotein 200 kDa helicaseU5 small nuclear ribonucleoprotein 200 kDa helicas...	6	1.06383
P78549	C118	Endonuclease III-like protein 1	6	1.06383
O75884	C127	Putative hydrolase RBBP9	6	1.06383
Q7Z6Z7	C1401	E3 ubiquitin-protein ligase HUWE1	6	1.06383
Q9UIG0	C156	Tyrosine-protein kinase BAZ1B	6	1.06383
Q6R327	C1614	Rapamycin-insensitive companion of mTOR	6	1.06383
Q9UGV2	C166	Protein NDRG3	6	1.06383
O43447	C174	Peptidyl-prolyl cis-trans isomerase H	6	1.06383
Q14696	C180	LDLR chaperone MESD	6	1.06383
P52564	C202	Dual specificity mitogen-activated protein kinase kinase 6Dual specificity mitogen-activated protein kinase ...	6	1.06383
O75390	C211	Citrate synthase, mitochondrial	6	1.06383
P46734	C213	Dual specificity mitogen-activated protein kinase kinase 3Dual specificity mitogen-activated protein kinase ...	6	1.06383
Q9NYL2	C22	Mitogen-activated protein kinase kinase kinase MLT	6	1.06383
Q96IF1	C224	LIM domain-containing protein ajuba	6	1.06383
Q9UPW6	C246	DNA-binding protein SATB2	6	1.06383
P35244	C26	Replication protein A 14 kDa subunit	6	1.06383
Q9NY27	C30	Serine/threonine-protein phosphatase 4 regulatory subunit 2Serine/threonine-protein phosphatase 4 regulatory ...	6	1.06383
P23381	C309	Tryptophan--tRNA ligase, cytoplasmic	6	1.06383
P13489	C313	Ribonuclease inhibitor	6	1.06383
P35998	C377	26S protease regulatory subunit 7	6	1.06383
P20810	C408	Calpastatin	6	1.06383
Q15046	C427	Lysine--tRNA ligase	6	1.06383
Q6ZV73	C638	FYVE, RhoGEF and PH domain-containing protein 6	6	1.06383
P17509	C88	Homeobox protein Hox-B6	6	1.06383
Q12968	C90	Nuclear factor of activated T-cells, cytoplasmic 3	6	1.06383
Q9Y6B6	C102	GTP-binding protein SAR1b	5.98007	1.0636
Q8N883	C104	Zinc finger protein 614	5.98007	1.0636
P42575	C305	Caspase-2	5.98007	1.0636
Q8WUW1	C49	Protein BRICK1	5.98007	1.0636
P62244	C72	40S ribosomal protein S15a	5.98007	1.0636
Q5UIP0	C730	Telomere-associated protein RIF1	5.98007	1.0636
O43716	C99	Glutamyl-tRNA(Gln) amidotransferase subunit C, mitochondrialGlutamyl-tRNA(Gln) amidotransferase subunit C, mit...	5.98007	1.0636
Q6NUS6	C133	Tectonic-3	5.68562	1.06028
Q9UKA4	C1338	A-kinase anchor protein 11	5.68562	1.06028
P35270	C159	Sepiapterin reductase	5.68562	1.06028
Q9NUQ6	C339	SPATS2-like protein	5.68562	1.06028
P52657	C68	Transcription initiation factor IIA subunit 2	5.68562	1.06028
Q6ZRI6	C808	Uncharacterized protein C15orf39	5.68562	1.06028
P46777	C100	60S ribosomal protein L5	5.66667	1.06007
O60610	C1005	Protein diaphanous homolog 1	5.66667	1.06007
Q7Z7F0	C116	UPF0469 protein KIAA0907	5.66667	1.06007
P07814	C123	Bifunctional glutamate/proline--tRNA ligase	5.66667	1.06007
Q71RC2	C130	La-related protein 4	5.66667	1.06007
Q96Q15	C1373	Serine/threonine-protein kinase SMG1	5.66667	1.06007
Q9C0I1	C152	Myotubularin-related protein 12	5.66667	1.06007
Q5TA50	C163	Glycolipid transfer protein domain-containing protein 1Glycolipid transfer protein domain-containing prot...	5.66667	1.06007
P49368	C173	T-complex protein 1 subunit gamma	5.66667	1.06007
Q96T51	C184	RUN and FYVE domain-containing protein 1	5.66667	1.06007
Q9NRH1	C185	Yae1 domain-containing protein 1	5.66667	1.06007
Q15084	C193	Protein disulfide-isomerase A6	5.66667	1.06007
Q562E7	C215	WD repeat-containing protein 81	5.66667	1.06007
Q9UKF6	C223	Cleavage and polyadenylation specificity factor subunit 3Cleavage and polyadenylation specificity factor su...	5.66667	1.06007
Q53H96	C235	Pyrroline-5-carboxylate reductase 3	5.66667	1.06007
P25705	C244	ATP synthase subunit alpha, mitochondrial	5.66667	1.06007
Q9BQC3	C251	Diphthamide biosynthesis protein 2	5.66667	1.06007
Q6UXN9	C287	WD repeat-containing protein 82	5.66667	1.06007
P48637	C294	Glutathione synthetase	5.66667	1.06007
Q14566	C301	DNA replication licensing factor MCM6	5.66667	1.06007
Q70CQ2	C3326	Ubiquitin carboxyl-terminal hydrolase 34	5.66667	1.06007
Q8NBS9	C353	Thioredoxin domain-containing protein 5	5.66667	1.06007
Q99996	C3868	A-kinase anchor protein 9	5.66667	1.06007
Q9Y6X9	C393	MORC family CW-type zinc finger protein 2	5.66667	1.06007
P30101	C409	Protein disulfide-isomerase A3	5.66667	1.06007
Q96D53	C479	Uncharacterized aarF domain-containing protein kinase 4Uncharacterized aarF domain-containing protein kin...	5.66667	1.06007
P07237	C56	Protein disulfide-isomerase	5.66667	1.06007
Q9UHF1	C62	Epidermal growth factor-like protein 7	5.66667	1.06007
Q9BQA1	C65	Methylosome protein 50	5.66667	1.06007
Q8TEX9	C708	Importin-4	5.66667	1.06007
Q8NB46	C733	Serine/threonine-protein phosphatase 6 regulatory ankyrin repeat subunit CSerine/threonine-protein phosphatase 6 regulatory ...	5.66667	1.06007
P49760	C74	Dual specificity protein kinase CLK2	5.66667	1.06007
Q9Y3B4	C74	Pre-mRNA branch site protein p14	5.66667	1.06007
P13667	C94	Protein disulfide-isomerase A4	5.66667	1.06007
Q9NSY1	C32	BMP-2-inducible protein kinase	5.64784	1.05986
P46459	C11	Vesicle-fusing ATPase	5.35117	1.05654
O00571	C229	ATP-dependent RNA helicase DDX3X	5.35117	1.05654
Q96R06	C46	Sperm-associated antigen 5	5.35117	1.05654
P25325	C65	3-mercaptopyruvate sulfurtransferase	5.35117	1.05654
Q9HDC5	C101	Junctophilin-1	5.33333	1.05634
B0LM41	C108	fusion Transcriptional coactivator CoAZ	5.33333	1.05634
P28074	C117	Proteasome subunit beta type-5	5.33333	1.05634
Q6IA86	C13	Elongator complex protein 2	5.33333	1.05634
O14733	C131	Dual specificity mitogen-activated protein kinase kinase 7Dual specificity mitogen-activated protein kinase ...	5.33333	1.05634
P01892	C131	HLA class I histocompatibility antigen, A-2 alpha chainHLA class I histocompatibility antigen, A-2 alpha ...	5.33333	1.05634
Q99961	C147	Endophilin-A2	5.33333	1.05634
P29218	C184	Inositol monophosphatase 1	5.33333	1.05634
O14717	C222	tRNA (cytosine(38)-C(5))-methyltransferase	5.33333	1.05634
Q8TCS8	C248	Polyribonucleotide nucleotidyltransferase 1, mitochondrialPolyribonucleotide nucleotidyltransferase 1, mitoc...	5.33333	1.05634
P62249	C25	40S ribosomal protein S16	5.33333	1.05634
P26599	C251	Polypyrimidine tract-binding protein 1	5.33333	1.05634
P32929	C252	Cystathionine gamma-lyase	5.33333	1.05634
O00743	C262	Serine/threonine-protein phosphatase 6 catalytic subunitSerine/threonine-protein phosphatase 6 catalytic s...	5.33333	1.05634
Q5TC12	C27	ATP synthase mitochondrial F1 complex assembly factor 1ATP synthase mitochondrial F1 complex assembly fac...	5.33333	1.05634
Q6PJG6	C28	BRCA1-associated ATM activator 1	5.33333	1.05634
P07195	C294	L-lactate dehydrogenase B chain	5.33333	1.05634
Q96RS0	C357	Trimethylguanosine synthase	5.33333	1.05634
P23528	C39	Cofilin-1	5.33333	1.05634
Q7Z7G8	C3937	Vacuolar protein sorting-associated protein 13B	5.33333	1.05634
Q9UQ80	C49	Proliferation-associated protein 2G4	5.33333	1.05634
P41252	C526	Isoleucine--tRNA ligase, cytoplasmic	5.33333	1.05634
Q9H4A3	C553	Serine/threonine-protein kinase WNK1	5.33333	1.05634
Q9Y4R8	C644	Telomere length regulation protein TEL2 homolog	5.33333	1.05634
Q96EQ0	C67	Small glutamine-rich tetratricopeptide repeat-containing protein betaSmall glutamine-rich tetratricopeptide repeat-cont...	5.33333	1.05634
Q86VP1	C675	Tax1-binding protein 1	5.33333	1.05634
Q86VP6	C71	Cullin-associated NEDD8-dissociated protein 1	5.33333	1.05634
Q14691	C75	DNA replication complex GINS protein PSF1	5.33333	1.05634
O00170	C90	AH receptor-interacting protein	5.33333	1.05634
Q9Y3D0	C93	Mitotic spindle-associated MMXD complex subunit MIP18Mitotic spindle-associated MMXD complex subunit MI...	5.33333	1.05634
Q9HB21	C163	Pleckstrin homology domain-containing family A member 1Pleckstrin homology domain-containing family A mem...	5.31561	1.05614
Q00765	C18	Receptor expression-enhancing protein 5	5.31561	1.05614
Q9UFC0	C249	Leucine-rich repeat and WD repeat-containing protein 1Leucine-rich repeat and WD repeat-containing prote...	5.31561	1.05614
P12277	C254	Creatine kinase B-type	5.31561	1.05614
P03897	C39	NADH-ubiquinone oxidoreductase chain 3	5.31561	1.05614
Q9H7S9	C516	Zinc finger protein 703	5.31561	1.05614
Q00535	C117	Cyclin-dependent kinase 5	5.01672	1.05282
Q9H160	C130	Inhibitor of growth protein 2	5.01672	1.05282
P21953	C177	2-oxoisovalerate dehydrogenase subunit beta, mitochondrial2-oxoisovalerate dehydrogenase subunit beta, mitoc...	5.01672	1.05282
P38606	C394	V-type proton ATPase catalytic subunit A	5.01672	1.05282
Q12888	C621	Tumor suppressor p53-binding protein 1	5.01672	1.05282
O95989	C68	Diphosphoinositol polyphosphate phosphohydrolase 1	5.01672	1.05282
P46060	C82	Ran GTPase-activating protein 1	5.01672	1.05282
P17098	C94	Zinc finger protein 8	5.01672	1.05282
Q9BTC0	C1079	Death-inducer obliterator 1	5	1.05263
Q9C0C2	C1114	182 kDa tankyrase-1-binding protein	5	1.05263
Q12841	C113	Follistatin-related protein 1	5	1.05263
Q8NEZ5	C123	F-box only protein 22	5	1.05263
Q5VYK3	C1257	Proteasome-associated protein ECM29 homolog	5	1.05263
Q9UPS6	C1405	Histone-lysine N-methyltransferase SETD1B	5	1.05263
Q86WB0	C156	Nuclear-interacting partner of ALK	5	1.05263
Q9Y5W9	C165	Sorting nexin-11	5	1.05263
P22102	C168	Trifunctional purine biosynthetic protein adenosine-3Trifunctional purine biosynthetic protein adenosin...	5	1.05263
Q9BQA1	C172	Methylosome protein 50	5	1.05263
P00492	C206	Hypoxanthine-guanine phosphoribosyltransferase	5	1.05263
P21281	C207	V-type proton ATPase subunit B, brain isoform	5	1.05263
Q7Z417	C234	Nuclear fragile X mental retardation-interacting protein 2Nuclear fragile X mental retardation-interacting p...	5	1.05263
P53384	C241	Cytosolic Fe-S cluster assembly factor NUBP1	5	1.05263
P25205	C263	DNA replication licensing factor MCM3	5	1.05263
Q9Y617	C291	Phosphoserine aminotransferase	5	1.05263
Q8NEW0	C308	Zinc transporter 7	5	1.05263
O43663	C322	Protein regulator of cytokinesis 1	5	1.05263
Q9NU22	C3308	Midasin	5	1.05263
Q96BN8	C347	Protein FAM105B	5	1.05263
Q49A88	C350	Coiled-coil domain-containing protein 14	5	1.05263
Q13363	C38	C-terminal-binding protein 1	5	1.05263
Q13564	C384	NEDD8-activating enzyme E1 regulatory subunit	5	1.05263
A6NED2	C42	RCC1 domain-containing protein 1	5	1.05263
Q7Z3C6	C439	Autophagy-related protein 9A	5	1.05263
P56545	C44	C-terminal-binding protein 2	5	1.05263
O43432	C461	Eukaryotic translation initiation factor 4 gamma 3	5	1.05263
Q96EA4	C490	Protein Spindly	5	1.05263
O43776	C537	Asparagine--tRNA ligase, cytoplasmic	5	1.05263
P40818	C575	Ubiquitin carboxyl-terminal hydrolase 8	5	1.05263
Q8TCG1	C615	Protein CIP2A	5	1.05263
Q9Y520	C620	Protein PRRC2C	5	1.05263
P16435	C629	NADPH--cytochrome P450 reductase	5	1.05263
Q96FH0	C71	Protein MEF2BNB	5	1.05263
Q9Y5M8	C73	Signal recognition particle receptor subunit beta	5	1.05263
P78527	C795	DNA-dependent protein kinase catalytic subunit	5	1.05263
Q01970	C892	1-phosphatidylinositol 4,5-bisphosphate phosphodiesterase beta-31-phosphatidylinositol 4,5-bisphosphate phosphodie...	5	1.05263
P49591	C438	Serine--tRNA ligase, cytoplasmic	4.98339	1.05245
P55884	C700	Eukaryotic translation initiation factor 3 subunit BEukaryotic translation initiation factor 3 subunit...	4.98339	1.05245
Q969H6	C11	Ribonuclease P/MRP protein subunit POP5	4.68227	1.04912
Q8N999	C294	Uncharacterized protein C12orf29	4.68227	1.04912
P07195	C300	L-lactate dehydrogenase B chain	4.68227	1.04912
P05023	C518	Sodium/potassium-transporting ATPase subunit alpha-1Sodium/potassium-transporting ATPase subunit alpha...	4.68227	1.04912
Q9C0B1	C104	Alpha-ketoglutarate-dependent dioxygenase FTO	4.66667	1.04895
Q9UKV3	C1052	Apoptotic chromatin condensation inducer in the nucleusApoptotic chromatin condensation inducer in the nu...	4.66667	1.04895
Q96RG2	C108	PAS domain-containing serine/threonine-protein kinasePAS domain-containing serine/threonine-protein kin...	4.66667	1.04895
P19174	C1109	1-phosphatidylinositol 4,5-bisphosphate phosphodiesterase gamma-11-phosphatidylinositol 4,5-bisphosphate phosphodie...	4.66667	1.04895
Q14683	C1180	Structural maintenance of chromosomes protein 1A	4.66667	1.04895
P21333	C1260	Filamin-A	4.66667	1.04895
Q9Y6J0	C1465	Calcineurin-binding protein cabin-1	4.66667	1.04895
Q9H6U6	C16	Breast carcinoma-amplified sequence 3	4.66667	1.04895
Q9NP72	C160	Ras-related protein Rab-18	4.66667	1.04895
Q96RV3	C1621	Pecanex-like protein 1	4.66667	1.04895
Q96MX6	C184	WD repeat-containing protein 92	4.66667	1.04895
O95613	C2014	Pericentrin	4.66667	1.04895
O94808	C226	Glucosamine--fructose-6-phosphate aminotransferase [isomerizing] 2 [REVIEWED] ENSG00000131459;IPI00216159;O94808;Q53XM2;Q9BWS4Glucosamine--fructose-6-phosphate aminotransferase...	4.66667	1.04895
P35998	C270	26S protease regulatory subunit 7	4.66667	1.04895
O43414	C285	ERI1 exoribonuclease 3	4.66667	1.04895
Q9UBS8	C350	E3 ubiquitin-protein ligase RNF14	4.66667	1.04895
O15040	C377	Tectonin beta-propeller repeat-containing protein 2Tectonin beta-propeller repeat-containing protein ...	4.66667	1.04895
Q10567	C380	AP-1 complex subunit beta-1	4.66667	1.04895
Q8TAA5	C44	GrpE protein homolog 2, mitochondrial	4.66667	1.04895
Q53H96	C49	Pyrroline-5-carboxylate reductase 3	4.66667	1.04895
P40227	C505	T-complex protein 1 subunit zeta	4.66667	1.04895
Q9BV94	C558	ER degradation-enhancing alpha-mannosidase-like 2	4.66667	1.04895
O95905	C563	Protein SGT1	4.66667	1.04895
Q8WUB8	C57	PHD finger protein 10	4.66667	1.04895
Q8N3Y1	C575	F-box/WD repeat-containing protein 8	4.66667	1.04895
P08107	C603	Heat shock 70 kDa protein 1A/1B	4.66667	1.04895
Q2M1P5	C647	Kinesin-like protein KIF7	4.66667	1.04895
Q96LR5	C75	Ubiquitin-conjugating enzyme E2 E2	4.66667	1.04895
P55072	C77	Transitional endoplasmic reticulum ATPase	4.66667	1.04895
P11802	C78	Cyclin-dependent kinase 4	4.66667	1.04895
Q04446	C81	1,4-alpha-glucan-branching enzyme	4.66667	1.04895
Q9Y3D8	C81	Adenylate kinase isoenzyme 6	4.66667	1.04895
Q12789	C853	General transcription factor 3C polypeptide 1	4.66667	1.04895
O95239	C977	Chromosome-associated kinesin KIF4A	4.66667	1.04895
P55072	C105	Transitional endoplasmic reticulum ATPase	4.65116	1.04878
A6NED2	C139	RCC1 domain-containing protein 1	4.65116	1.04878
Q9ULC4	C144	Malignant T-cell-amplified sequence 1	4.65116	1.04878
Q8TDX7	C253	Serine/threonine-protein kinase Nek7	4.65116	1.04878
P21953	C316	2-oxoisovalerate dehydrogenase subunit beta, mitochondrial2-oxoisovalerate dehydrogenase subunit beta, mitoc...	4.65116	1.04878
Q9NQG7	C535	Hermansky-Pudlak syndrome 4 protein	4.65116	1.04878
Q96EN8	C558	Molybdenum cofactor sulfurase	4.65116	1.04878
Q6UB99	C646	Ankyrin repeat domain-containing protein 11	4.65116	1.04878
O15111	C658	Inhibitor of nuclear factor kappa-B kinase subunit alphaInhibitor of nuclear factor kappa-B kinase subunit...	4.65116	1.04878
Q8TDJ6	C1788	DmX-like protein 2	4.34783	1.04545
P35612	C210	Beta-adducin	4.34783	1.04545
P50570	C27	Dynamin-2	4.34783	1.04545
P98170	C351	E3 ubiquitin-protein ligase XIAP	4.34783	1.04545
Q96T51	C351	RUN and FYVE domain-containing protein 1	4.34783	1.04545
O43583	C44	Density-regulated protein	4.34783	1.04545
Q9C0C9	C913	Ubiquitin-conjugating enzyme E2 O	4.34783	1.04545
Q9BXL8	C102	Cell division cycle-associated protein 4	4.33333	1.0453
Q6P2E9	C1054	Enhancer of mRNA-decapping protein 4	4.33333	1.0453
Q9BZE9	C109	Tether containing UBX domain for GLUT4	4.33333	1.0453
P53041	C11	Serine/threonine-protein phosphatase 5	4.33333	1.0453
Q69YN2	C11	CWF19-like protein 1	4.33333	1.0453
P21399	C118	Cytoplasmic aconitate hydratase	4.33333	1.0453
P35916	C1239	Vascular endothelial growth factor receptor 3	4.33333	1.0453
Q92990	C13	Glomulin	4.33333	1.0453
Q96F63	C136	Coiled-coil domain-containing protein 97	4.33333	1.0453
P63244	C138	Guanine nucleotide-binding protein subunit beta-2-like 1Guanine nucleotide-binding protein subunit beta-2-...	4.33333	1.0453
Q86Y56	C138	HEAT repeat-containing protein 2	4.33333	1.0453
Q8IUL8	C143	Cartilage intermediate layer protein 2	4.33333	1.0453
Q9P258	C144	Protein RCC2	4.33333	1.0453
Q99741	C146	Cell division control protein 6 homolog	4.33333	1.0453
P27824	C160	Calnexin	4.33333	1.0453
P42224	C161	Signal transducer and activator of transcription 1-alpha/betaSignal transducer and activator of transcription 1...	4.33333	1.0453
Q9NRH1	C161	Yae1 domain-containing protein 1	4.33333	1.0453
O60333	C1661	Kinesin-like protein KIF1B	4.33333	1.0453
Q9UG01	C1686	Intraflagellar transport protein 172 homolog	4.33333	1.0453
O75420	C177	PERQ amino acid-rich with GYF domain-containing protein 1PERQ amino acid-rich with GYF domain-containing pr...	4.33333	1.0453
Q7Z6Z7	C19	E3 ubiquitin-protein ligase HUWE1	4.33333	1.0453
P20618	C224	Proteasome subunit beta type-1	4.33333	1.0453
Q9H3C7	C236	Gametogenetin-binding protein 2	4.33333	1.0453
Q9Y2T2	C236	AP-3 complex subunit mu-1	4.33333	1.0453
O15162	C254	Phospholipid scramblase 1	4.33333	1.0453
O15379	C268	Histone deacetylase 3	4.33333	1.0453
P23368	C274	NAD-dependent malic enzyme, mitochondrial	4.33333	1.0453
Q6FI81	C277	Anamorsin	4.33333	1.0453
P53677	C29	AP-3 complex subunit mu-2	4.33333	1.0453
P30566	C33	Adenylosuccinate lyase	4.33333	1.0453
P54727	C390	UV excision repair protein RAD23 homolog B	4.33333	1.0453
Q8TEX9	C42	Importin-4	4.33333	1.0453
O00429	C470	Dynamin-1-like protein	4.33333	1.0453
Q8N5Y8	C52	Mono [ADP-ribose] polymerase PARP16 [REVIEWED] ENSG00000138617;IPI00794653;Q8N5Y8;Q6PK64;Q9NX03Mono [ADP-ribose] polymerase PARP16 [REVIEWED] ENS...	4.33333	1.0453
O60232	C53	Sjoegren syndrome/scleroderma autoantigen 1	4.33333	1.0453
P49736	C584	DNA replication licensing factor MCM2	4.33333	1.0453
Q8NI36	C650	WD repeat-containing protein 36	4.33333	1.0453
O95985	C666	DNA topoisomerase 3-beta-1	4.33333	1.0453
Q96JH8	C699	Ras-associating and dilute domain-containing proteinRas-associating and dilute domain-containing prote...	4.33333	1.0453
Q8N2Y8	C725	Iporin	4.33333	1.0453
F8VZW7	C74	protein	4.33333	1.0453
O95347	C800	Structural maintenance of chromosomes protein 2	4.33333	1.0453
Q8IVM0	C85	Coiled-coil domain-containing protein 50	4.33333	1.0453
Q9UBQ5	C85	Eukaryotic translation initiation factor 3 subunit KEukaryotic translation initiation factor 3 subunit...	4.33333	1.0453
Q96JC9	C86	ELL-associated factor 1	4.33333	1.0453
Q6ZRI6	C892	Uncharacterized protein C15orf39	4.33333	1.0453
Q9UPS6	C931	Histone-lysine N-methyltransferase SETD1B	4.33333	1.0453
Q9Y6X9	C962	MORC family CW-type zinc finger protein 2	4.33333	1.0453
Q92922	C119	SWI/SNF complex subunit SMARCC1	4.01338	1.04181
Q9Y2L9	C251	Leucine-rich repeat and calponin homology domain-containing protein 1Leucine-rich repeat and calponin homology domain-c...	4.01338	1.04181
Q8IWJ2	C297	GRIP and coiled-coil domain-containing protein 2	4.01338	1.04181
Q9HAZ1	C54	Dual specificity protein kinase CLK4	4.01338	1.04181
Q6KC79	C56	Nipped-B-like protein	4.01338	1.04181
Q9H3S7	C628	Tyrosine-protein phosphatase non-receptor type 23	4.01338	1.04181
P07858	C105	Cathepsin B	4	1.04167
Q86VP6	C1134	Cullin-associated NEDD8-dissociated protein 1	4	1.04167
Q96IZ6	C126	Methyltransferase-like protein 2A	4	1.04167
P24666	C13	Low molecular weight phosphotyrosine protein phosphataseLow molecular weight phosphotyrosine protein phosp...	4	1.04167
Q01581	C135	Hydroxymethylglutaryl-CoA synthase, cytoplasmic	4	1.04167
Q9BU61	C150	NADH dehydrogenase [ubiquinone] 1 alpha subcomplex assembly factor 3 [REVIEWED] ENSG00000178057;IPI00793724;Q9BU61NADH dehydrogenase [ubiquinone] 1 alpha subcomplex...	4	1.04167
Q7KZF4	C152	Staphylococcal nuclease domain-containing protein 1Staphylococcal nuclease domain-containing protein ...	4	1.04167
Q14204	C1977	Cytoplasmic dynein 1 heavy chain 1	4	1.04167
P07437	C211	Tubulin beta chain	4	1.04167
P68371	C211	Tubulin beta-4B chain	4	1.04167
Q9BUF5	C211	Tubulin beta-6 chain	4	1.04167
Q9BVA1	C211	Tubulin beta-2B chain	4	1.04167
Q13642	C212	Four and a half LIM domains protein 1	4	1.04167
Q9Y696	C234	Chloride intracellular channel protein 4	4	1.04167
Q567U6	C282	Coiled-coil domain-containing protein 93	4	1.04167
Q9HBG6	C284	Intraflagellar transport protein 122 homolog	4	1.04167
Q8IYB7	C285	DIS3-like exonuclease 2	4	1.04167
Q9NR45	C287	Sialic acid synthase	4	1.04167
Q9UJJ7	C299	RNA pseudouridylate synthase domain-containing protein 1RNA pseudouridylate synthase domain-containing pro...	4	1.04167
Q5VUJ6	C306	Leucine-rich repeat and calponin homology domain-containing protein 2Leucine-rich repeat and calponin homology domain-c...	4	1.04167
Q99832	C310	T-complex protein 1 subunit eta	4	1.04167
Q9HBK9	C334	Arsenite methyltransferase	4	1.04167
Q9BXF6	C337	Rab11 family-interacting protein 5	4	1.04167
Q96RR4	C34	Calcium/calmodulin-dependent protein kinase kinase 2Calcium/calmodulin-dependent protein kinase kinase...	4	1.04167
P10321	C345	HLA class I histocompatibility antigen, Cw-7 alpha chainHLA class I histocompatibility antigen, Cw-7 alpha...	4	1.04167
P49336	C355	Cyclin-dependent kinase 8	4	1.04167
O15234	C36	Protein CASC3	4	1.04167
O15371	C375	Eukaryotic translation initiation factor 3 subunit DEukaryotic translation initiation factor 3 subunit...	4	1.04167
P20810	C419	Calpastatin	4	1.04167
P07900	C420	Heat shock protein HSP 90-alpha	4	1.04167
P55084	C435	Trifunctional enzyme subunit beta, mitochondrial	4	1.04167
O95831	C441	Apoptosis-inducing factor 1, mitochondrial	4	1.04167
P35222	C466	Catenin beta-1	4	1.04167
Q8WVC0	C530	RNA polymerase-associated protein LEO1	4	1.04167
A1KXE4	C63	Myelin-associated neurite-outgrowth inhibitor	4	1.04167
P57775	C64	F-box/WD repeat-containing protein 4	4	1.04167
Q02543	C64	60S ribosomal protein L18a	4	1.04167
Q9BQ52	C676	Zinc phosphodiesterase ELAC protein 2	4	1.04167
Q5JPE7	C71	Nodal modulator 2	4	1.04167
P31751	C77	RAC-beta serine/threonine-protein kinase	4	1.04167
Q8N5C6	C777	S1 RNA-binding domain-containing protein 1	4	1.04167
Q8WVS4	C929	WD repeat-containing protein 60	4	1.04167
Q9UPN9	C943	E3 ubiquitin-protein ligase TRIM33	4	1.04167
Q6ZS17	C987	Protein FAM65A	4	1.04167
Q13620	C248	Cullin-4B	3.98671	1.04152
Q9UIC8	C250	Leucine carboxyl methyltransferase 1	3.98671	1.04152
Q5T9A4	C461	ATPase family AAA domain-containing protein 3B	3.98671	1.04152
Q14498	C478	RNA-binding protein 39	3.98671	1.04152
Q9HC35	C811	Echinoderm microtubule-associated protein-like 4	3.98671	1.04152
Q6PJ69	C174	Tripartite motif-containing protein 65	3.67893	1.03819
P04406	C247	Glyceraldehyde-3-phosphate dehydrogenase	3.67893	1.03819
Q13596	C318	Sorting nexin-1	3.67893	1.03819
P49642	C354	DNA primase small subunit	3.67893	1.03819
O60716	C581	Catenin delta-1	3.67893	1.03819
Q96PU4	C704	E3 ubiquitin-protein ligase UHRF2	3.67893	1.03819
P35579	C789	Myosin-9	3.67893	1.03819
P06400	C853	Retinoblastoma-associated protein	3.67893	1.03819
Q149N8	C885	E3 ubiquitin-protein ligase SHPRH	3.67893	1.03819
Q6IQ26	C1077	DENN domain-containing protein 5A	3.66667	1.03806
Q5VZL5	C1264	Zinc finger MYM-type protein 4	3.66667	1.03806
Q8NG31	C1301	Protein CASC5	3.66667	1.03806
Q8WUB8	C134	PHD finger protein 10	3.66667	1.03806
P46782	C155	40S ribosomal protein S5	3.66667	1.03806
Q5SVZ6	C159	Zinc finger MYM-type protein 1	3.66667	1.03806
Q9UPW6	C159	DNA-binding protein SATB2	3.66667	1.03806
O14964	C166	Hepatocyte growth factor-regulated tyrosine kinase substrateHepatocyte growth factor-regulated tyrosine kinase...	3.66667	1.03806
P21266	C178	Glutathione S-transferase Mu 3	3.66667	1.03806
P32780	C181	General transcription factor IIH subunit 1	3.66667	1.03806
O15020	C2036	Spectrin beta chain, non-erythrocytic 2	3.66667	1.03806
Q12802	C2101	A-kinase anchor protein 13	3.66667	1.03806
P18084	C211	Integrin beta-5	3.66667	1.03806
O43542	C221	DNA repair protein XRCC3	3.66667	1.03806
Q14974	C228	Importin subunit beta-1	3.66667	1.03806
O43896	C229	Kinesin-like protein KIF1C	3.66667	1.03806
Q8TCZ2	C236	CD99 antigen-like protein 2	3.66667	1.03806
Q7L590	C246	Protein MCM10 homolog	3.66667	1.03806
Q8IY95	C266	Transmembrane protein 192	3.66667	1.03806
O75808	C271	Calpain-15	3.66667	1.03806
Q7Z3U7	C276	Protein MON2 homolog	3.66667	1.03806
Q96JK2	C280	DDB1- and CUL4-associated factor 5	3.66667	1.03806
P48643	C377	T-complex protein 1 subunit epsilon	3.66667	1.03806
Q14318	C378	Peptidyl-prolyl cis-trans isomerase FKBP8	3.66667	1.03806
P07900	C380	Heat shock protein HSP 90-alpha	3.66667	1.03806
Q5T6F0	C380	DDB1- and CUL4-associated factor 12	3.66667	1.03806
Q6ZNG0	C404	Zinc finger protein 620	3.66667	1.03806
P40227	C406	T-complex protein 1 subunit zeta	3.66667	1.03806
Q9NZN8	C408	CCR4-NOT transcription complex subunit 2	3.66667	1.03806
Q9UBB6	C415	Neurochondrin	3.66667	1.03806
Q12802	C418	A-kinase anchor protein 13	3.66667	1.03806
Q96GX2	C43	Putative ataxin-7-like protein 3B	3.66667	1.03806
Q96PZ0	C443	Pseudouridylate synthase 7 homolog	3.66667	1.03806
Q9Y265	C49	RuvB-like 1	3.66667	1.03806
O60566	C510	Mitotic checkpoint serine/threonine-protein kinase BUB1 betaMitotic checkpoint serine/threonine-protein kinase...	3.66667	1.03806
P51617	C608	Interleukin-1 receptor-associated kinase 1	3.66667	1.03806
Q9BQG0	C623	Myb-binding protein 1A	3.66667	1.03806
Q6ZNW5	C64	GDP-D-glucose phosphorylase 1	3.66667	1.03806
P61081	C65	NEDD8-conjugating enzyme Ubc12	3.66667	1.03806
Q9NWZ5	C65	Uridine-cytidine kinase-like 1	3.66667	1.03806
P62906	C66	60S ribosomal protein L10a	3.66667	1.03806
Q15029	C663	116 kDa U5 small nuclear ribonucleoprotein component116 kDa U5 small nuclear ribonucleoprotein compone...	3.66667	1.03806
Q01968	C679	Inositol polyphosphate 5-phosphatase OCRL-1	3.66667	1.03806
Q9C0C2	C749	182 kDa tankyrase-1-binding protein	3.66667	1.03806
Q9Y5Q9	C810	General transcription factor 3C polypeptide 3	3.66667	1.03806
Q14693	C843	Phosphatidate phosphatase LPIN1	3.66667	1.03806
Q10567	C95	AP-1 complex subunit beta-1	3.66667	1.03806
Q7L1Q6	C96	Basic leucine zipper and W2 domain-containing protein 1Basic leucine zipper and W2 domain-containing prot...	3.66667	1.03806
P51858	C108	Hepatoma-derived growth factor	3.65449	1.03793
Q92917	C137	G patch domain and KOW motifs-containing protein	3.65449	1.03793
P46777	C144	60S ribosomal protein L5	3.65449	1.03793
Q9UDY4	C175	DnaJ homolog subfamily B member 4	3.65449	1.03793
P25685	C179	DnaJ homolog subfamily B member 1	3.65449	1.03793
P46821	C190	Microtubule-associated protein 1B	3.65449	1.03793
Q8NB90	C291	Spermatogenesis-associated protein 5	3.65449	1.03793
Q8N806	C374	Putative E3 ubiquitin-protein ligase UBR7	3.65449	1.03793
O15169	C441	Axin-1	3.65449	1.03793
P45984	C6	Mitogen-activated protein kinase 9	3.65449	1.03793
P07099	C80	Epoxide hydrolase 1	3.65449	1.03793
P62910	C97	60S ribosomal protein L32	3.65449	1.03793
Q6ICB0	C108	Desumoylating isopeptidase 1	3.34448	1.0346
Q13630	C116	GDP-L-fucose synthase	3.34448	1.0346
Q96Q42	C1454	Alsin	3.34448	1.0346
Q96E11	C160	Ribosome-recycling factor, mitochondrial	3.34448	1.0346
Q9NWU5	C166	39S ribosomal protein L22, mitochondrial	3.34448	1.0346
Q9NTK5	C193	Obg-like ATPase 1	3.34448	1.0346
P07947	C255	Tyrosine-protein kinase Yes	3.34448	1.0346
P08238	C366	Heat shock protein HSP 90-beta	3.34448	1.0346
Q5TKA1	C476	Protein lin-9 homolog	3.34448	1.0346
Q99590	C566	Protein SCAF11	3.34448	1.0346
Q9NX05	C1065	Constitutive coactivator of PPAR-gamma-like protein 2Constitutive coactivator of PPAR-gamma-like protei...	3.33333	1.03448
P42126	C120	Enoyl-CoA delta isomerase 1, mitochondrial	3.33333	1.03448
P51153	C123	Ras-related protein Rab-13	3.33333	1.03448
Q14690	C1283	Protein RRP5 homolog	3.33333	1.03448
P49006	C134	MARCKS-related protein	3.33333	1.03448
O75821	C139	Eukaryotic translation initiation factor 3 subunit GEukaryotic translation initiation factor 3 subunit...	3.33333	1.03448
Q6IEG0	C154	U11/U12 small nuclear ribonucleoprotein 48 kDa proteinU11/U12 small nuclear ribonucleoprotein 48 kDa pro...	3.33333	1.03448
O75530	C182	Polycomb protein EED	3.33333	1.03448
Q96EM0	C205	Trans-L-3-hydroxyproline dehydratase	3.33333	1.03448
Q9Y6A5	C206	Transforming acidic coiled-coil-containing protein 3Transforming acidic coiled-coil-containing protein...	3.33333	1.03448
O95571	C219	Protein ETHE1, mitochondrial	3.33333	1.03448
P16083	C223	Ribosyldihydronicotinamide dehydrogenase [quinone] [REVIEWED] ENSG00000124588;IPI00219129;P16083;B2R492;Q5TD04Ribosyldihydronicotinamide dehydrogenase [quinone]...	3.33333	1.03448
Q15366	C223	Poly(rC)-binding protein 2	3.33333	1.03448
P23526	C228	Adenosylhomocysteinase	3.33333	1.03448
Q2M2I8	C250	AP2-associated protein kinase 1	3.33333	1.03448
Q9NSY1	C254	BMP-2-inducible protein kinase	3.33333	1.03448
P46013	C27	Antigen KI-67	3.33333	1.03448
Q9UJK0	C283	Ribosome biogenesis protein TSR3 homolog	3.33333	1.03448
P55884	C302	Eukaryotic translation initiation factor 3 subunit BEukaryotic translation initiation factor 3 subunit...	3.33333	1.03448
Q14789	C3197	Golgin subfamily B member 1	3.33333	1.03448
Q14789	C3213	Golgin subfamily B member 1	3.33333	1.03448
Q9H0C8	C325	Integrin-linked kinase-associated serine/threonine phosphatase 2CIntegrin-linked kinase-associated serine/threonine...	3.33333	1.03448
Q13867	C332	Bleomycin hydrolase	3.33333	1.03448
O15371	C333	Eukaryotic translation initiation factor 3 subunit DEukaryotic translation initiation factor 3 subunit...	3.33333	1.03448
P49585	C346	Choline-phosphate cytidylyltransferase A	3.33333	1.03448
Q6PCE3	C348	Glucose 1,6-bisphosphate synthase	3.33333	1.03448
P13861	C359	cAMP-dependent protein kinase type II-alpha regulatory subunitcAMP-dependent protein kinase type II-alpha regula...	3.33333	1.03448
Q99707	C447	Methionine synthase	3.33333	1.03448
Q12800	C453	Alpha-globin transcription factor CP2	3.33333	1.03448
Q99541	C47	Perilipin-2	3.33333	1.03448
Q13616	C496	Cullin-1	3.33333	1.03448
P10599	C62	Thioredoxin	3.33333	1.03448
P42566	C657	Epidermal growth factor receptor substrate 15	3.33333	1.03448
Q01804	C685	OTU domain-containing protein 4	3.33333	1.03448
E9PET5	C686	Protein FAM193B	3.33333	1.03448
P04075	C73	Fructose-bisphosphate aldolase A	3.33333	1.03448
Q9H6R4	C777	Nucleolar protein 6	3.33333	1.03448
P53992	C78	Protein transport protein Sec24C	3.33333	1.03448
Q9Y3Z3	C80	SAM domain and HD domain-containing protein 1	3.33333	1.03448
Q15398	C811	Disks large-associated protein 5	3.33333	1.03448
Q96QE3	C831	ATPase family AAA domain-containing protein 5	3.33333	1.03448
P10768	C88	S-formylglutathione hydrolase	3.33333	1.03448
O14818	C91	Proteasome subunit alpha type-7	3.33333	1.03448
P60891	C91	Ribose-phosphate pyrophosphokinase 1	3.33333	1.03448
Q14353	C91	Guanidinoacetate N-methyltransferase	3.33333	1.03448
Q8NG31	C952	Protein CASC5	3.33333	1.03448
P35659	C161	Protein DEK	3.32226	1.03436
P51570	C203	Galactokinase	3.32226	1.03436
Q8NBA8	C226	DTW domain-containing protein 2	3.32226	1.03436
P49792	C2737	E3 SUMO-protein ligase RanBP2	3.32226	1.03436
Q6P2H3	C286	Centrosomal protein of 85 kDa	3.32226	1.03436
O75694	C373	Nuclear pore complex protein Nup155	3.32226	1.03436
P50991	C456	T-complex protein 1 subunit delta	3.32226	1.03436
Q02809	C680	Procollagen-lysine,2-oxoglutarate 5-dioxygenase 1	3.32226	1.03436
P49327	C779	Fatty acid synthase	3.32226	1.03436
O75794	C170	Cell division cycle protein 123 homolog	3.01003	1.03103
Q12996	C176	Cleavage stimulation factor subunit 3	3.01003	1.03103
Q8N335	C202	Glycerol-3-phosphate dehydrogenase 1-like protein	3.01003	1.03103
Q9BUM1	C269	Glucose-6-phosphatase 3	3.01003	1.03103
P08559	C273	Pyruvate dehydrogenase E1 component subunit alpha, somatic form, mitochondrialPyruvate dehydrogenase E1 component subunit alpha,...	3.01003	1.03103
Q13547	C273	Histone deacetylase 1	3.01003	1.03103
P62879	C277	Guanine nucleotide-binding protein G(I)/G(S)/G(T) subunit beta-2Guanine nucleotide-binding protein G(I)/G(S)/G(T) ...	3.01003	1.03103
P54136	C369	Arginine--tRNA ligase, cytoplasmic	3.01003	1.03103
O95782	C403	AP-2 complex subunit alpha-1	3.01003	1.03103
Q9BQ52	C632	Zinc phosphodiesterase ELAC protein 2	3.01003	1.03103
P53618	C641	Coatomer subunit beta	3.01003	1.03103
Q96J01	C65	THO complex subunit 3	3.01003	1.03103
Q15468	C970	SCL-interrupting locus protein	3.01003	1.03103
P41229	C1047	Lysine-specific demethylase 5C	3	1.03093
Q9NZB2	C1103	Constitutive coactivator of PPAR-gamma-like protein 1Constitutive coactivator of PPAR-gamma-like protei...	3	1.03093
P48556	C112	26S proteasome non-ATPase regulatory subunit 8	3	1.03093
Q9UNS1	C1126	Protein timeless homolog	3	1.03093
Q14683	C1210	Structural maintenance of chromosomes protein 1A	3	1.03093
P39687	C123	Acidic leucine-rich nuclear phosphoprotein 32 family member AAcidic leucine-rich nuclear phosphoprotein 32 fami...	3	1.03093
P25054	C1270	Adenomatous polyposis coli protein	3	1.03093
P11940	C128	Polyadenylate-binding protein 1	3	1.03093
Q13310	C128	Polyadenylate-binding protein 4	3	1.03093
Q9H3P7	C135	Golgi resident protein GCP60	3	1.03093
P62873	C149	Guanine nucleotide-binding protein G(I)/G(S)/G(T) subunit beta-1Guanine nucleotide-binding protein G(I)/G(S)/G(T) ...	3	1.03093
O75529	C15	TAF5-like RNA polymerase II p300/CBP-associated factor-associated factor 65 kDa subunit 5LTAF5-like RNA polymerase II p300/CBP-associated fa...	3	1.03093
Q9UHB6	C164	LIM domain and actin-binding protein 1	3	1.03093
Q8TDJ6	C1897	DmX-like protein 2	3	1.03093
Q9Y316	C191	Protein MEMO1	3	1.03093
Q8TDM6	C1917	Disks large homolog 5	3	1.03093
P27635	C195	60S ribosomal protein L10	3	1.03093
Q96E09	C206	Protein FAM122A	3	1.03093
P31350	C208	Ribonucleoside-diphosphate reductase subunit M2	3	1.03093
Q7Z2T5	C239	TRMT1-like protein	3	1.03093
Q9BPU6	C241	Dihydropyrimidinase-related protein 5	3	1.03093
P49327	C2468	Fatty acid synthase	3	1.03093
Q96ER3	C248	Protein SAAL1	3	1.03093
O15131	C253	Importin subunit alpha-6	3	1.03093
Q6P4I2	C267	WD repeat-containing protein 73	3	1.03093
P62873	C294	Guanine nucleotide-binding protein G(I)/G(S)/G(T) subunit beta-1Guanine nucleotide-binding protein G(I)/G(S)/G(T) ...	3	1.03093
O76094	C329	Signal recognition particle 72 kDa protein	3	1.03093
Q8TDP1	C34	Ribonuclease H2 subunit C	3	1.03093
P48507	C35	Glutamate--cysteine ligase regulatory subunit	3	1.03093
Q96CS3	C38	FAS-associated factor 2	3	1.03093
Q5JPH6	C386	Probable glutamate--tRNA ligase, mitochondrial	3	1.03093
O43747	C400	AP-1 complex subunit gamma-1	3	1.03093
Q6ZRI6	C41	Uncharacterized protein C15orf39	3	1.03093
Q86W50	C432	Methyltransferase-like protein 16	3	1.03093
P27707	C45	Deoxycytidine kinase	3	1.03093
P62316	C46	Small nuclear ribonucleoprotein Sm D2	3	1.03093
Q8TAT5	C480	Endonuclease 8-like 3	3	1.03093
Q8TAQ2	C486	SWI/SNF complex subunit SMARCC2	3	1.03093
Q9UG63	C486	ATP-binding cassette sub-family F member 2	3	1.03093
Q9UPT9	C494	Ubiquitin carboxyl-terminal hydrolase 22	3	1.03093
Q92922	C511	SWI/SNF complex subunit SMARCC1	3	1.03093
O14980	C528	Exportin-1	3	1.03093
Q8IX01	C540	SURP and G-patch domain-containing protein 2	3	1.03093
Q9BY89	C585	Uncharacterized protein KIAA1671	3	1.03093
Q9UG63	C586	ATP-binding cassette sub-family F member 2	3	1.03093
Q8IW35	C605	Centrosomal protein of 97 kDa	3	1.03093
Q14258	C70	E3 ubiquitin/ISG15 ligase TRIM25	3	1.03093
O00410	C733	Importin-5	3	1.03093
Q96S38	C733	Ribosomal protein S6 kinase delta-1	3	1.03093
O43143	C750	Putative pre-mRNA-splicing factor ATP-dependent RNA helicase DHX15Putative pre-mRNA-splicing factor ATP-dependent RN...	3	1.03093
P49207	C83	60S ribosomal protein L34	3	1.03093
Q9H063	C88	Repressor of RNA polymerase III transcription MAF1 homologRepressor of RNA polymerase III transcription MAF1...	3	1.03093
O43913	C10	Origin recognition complex subunit 5	2.99003	1.03082
A0JNW5	C1098	UHRF1-binding protein 1-like	2.99003	1.03082
Q96HS1	C12	Serine/threonine-protein phosphatase PGAM5, mitochondrialSerine/threonine-protein phosphatase PGAM5, mitoch...	2.99003	1.03082
Q9UIG0	C1395	Tyrosine-protein kinase BAZ1B	2.99003	1.03082
Q96T88	C170	E3 ubiquitin-protein ligase UHRF1	2.99003	1.03082
P17812	C216	CTP synthase 1	2.99003	1.03082
Q9ULV4	C23	Coronin-1C	2.99003	1.03082
P40227	C282	T-complex protein 1 subunit zeta	2.99003	1.03082
P07195	C42	L-lactate dehydrogenase B chain	2.99003	1.03082
P14923	C420	Junction plakoglobin	2.99003	1.03082
P50579	C468	Methionine aminopeptidase 2	2.99003	1.03082
Q9Y5A7	C52	NEDD8 ultimate buster 1	2.99003	1.03082
P68366	C54	Tubulin alpha-4A chain	2.99003	1.03082
Q9NWY4	C17	UPF0609 protein C4orf27	2.67559	1.02749
O94788	C320	Retinal dehydrogenase 2	2.67559	1.02749
P56192	C38	Methionine--tRNA ligase, cytoplasmic	2.67559	1.02749
O94854	C401	Uncharacterized protein KIAA0754	2.67559	1.02749
Q8IZL8	C594	Proline-, glutamic acid- and leucine-rich protein 1Proline-, glutamic acid- and leucine-rich protein ...	2.67559	1.02749
Q5T1M5	C1031	FK506-binding protein 15	2.66667	1.0274
Q8NFD5	C1093	AT-rich interactive domain-containing protein 1B	2.66667	1.0274
Q96B54	C115	Zinc finger protein 428	2.66667	1.0274
P25205	C119	DNA replication licensing factor MCM3	2.66667	1.0274
Q15361	C127	Transcription termination factor 1	2.66667	1.0274
Q01484	C1425	Ankyrin-2	2.66667	1.0274
P22392	C145	Nucleoside diphosphate kinase B	2.66667	1.0274
Q9P0K8	C145	Forkhead box protein J2	2.66667	1.0274
Q96QT4	C1484	Transient receptor potential cation channel subfamily M member 7Transient receptor potential cation channel subfam...	2.66667	1.0274
Q9UKA4	C1488	A-kinase anchor protein 11	2.66667	1.0274
O94903	C15	Proline synthase co-transcribed bacterial homolog proteinProline synthase co-transcribed bacterial homolog ...	2.66667	1.0274
Q13404	C150	Ubiquitin-conjugating enzyme E2 variant 1	2.66667	1.0274
Q9BY41	C153	Histone deacetylase 8	2.66667	1.0274
Q66PJ3	C159	ADP-ribosylation factor-like protein 6-interacting protein 4ADP-ribosylation factor-like protein 6-interacting...	2.66667	1.0274
Q9HCD6	C162	Protein TANC2	2.66667	1.0274
P25789	C163	Proteasome subunit alpha type-4	2.66667	1.0274
Q8N2W9	C164	E3 SUMO-protein ligase PIAS4	2.66667	1.0274
P30825	C21	High affinity cationic amino acid transporter 1	2.66667	1.0274
Q9H0B6	C221	Kinesin light chain 2	2.66667	1.0274
Q9BU02	C228	Thiamine-triphosphatase	2.66667	1.0274
Q9NSK0	C234	Kinesin light chain 4	2.66667	1.0274
Q07866	C236	Kinesin light chain 1	2.66667	1.0274
O60547	C237	GDP-mannose 4,6 dehydratase	2.66667	1.0274
P26599	C250	Polypyrimidine tract-binding protein 1	2.66667	1.0274
P08243	C255	Asparagine synthetase [glutamine-hydrolyzing] [REVIEWED] ENSG00000070669;IPI00554777;P08243;A4D1I8;D6W5R3;P08184;Q15666;Q549T9;Q96HD0Asparagine synthetase [glutamine-hydrolyzing] [REV...	2.66667	1.0274
P48066	C28	Sodium- and chloride-dependent GABA transporter 3	2.66667	1.0274
Q96QU8	C28	Exportin-6	2.66667	1.0274
Q8N999	C302	Uncharacterized protein C12orf29	2.66667	1.0274
P20042	C309	Eukaryotic translation initiation factor 2 subunit 2Eukaryotic translation initiation factor 2 subunit...	2.66667	1.0274
P54136	C312	Arginine--tRNA ligase, cytoplasmic	2.66667	1.0274
Q2NL68	C34	Uncharacterized protein C19orf55	2.66667	1.0274
Q9UBT2	C432	SUMO-activating enzyme subunit 2	2.66667	1.0274
P45974	C532	Ubiquitin carboxyl-terminal hydrolase 5	2.66667	1.0274
Q9NYZ3	C539	G2 and S phase-expressed protein 1	2.66667	1.0274
Q9H3C7	C554	Gametogenetin-binding protein 2	2.66667	1.0274
Q2TB18	C640	Protein asteroid homolog 1	2.66667	1.0274
Q9P2J5	C70	Leucine--tRNA ligase, cytoplasmic	2.66667	1.0274
Q68E01	C731	Integrator complex subunit 3	2.66667	1.0274
Q9UPV0	C810	Centrosomal protein of 164 kDa	2.66667	1.0274
P53396	C845	ATP-citrate synthase	2.66667	1.0274
Q6N021	C88	Methylcytosine dioxygenase TET2	2.66667	1.0274
P78527	C90	DNA-dependent protein kinase catalytic subunit	2.66667	1.0274
Q15393	C1054	Splicing factor 3B subunit 3	2.65781	1.0273
O75369	C1081	Filamin-B	2.65781	1.0273
Q14315	C1103	Filamin-C	2.65781	1.0273
Q9Y6H1	C124	Coiled-coil-helix-coiled-coil-helix domain-containing protein 2, mitochondrialCoiled-coil-helix-coiled-coil-helix domain-contain...	2.65781	1.0273
Q15366	C158	Poly(rC)-binding protein 2	2.65781	1.0273
P12955	C183	Xaa-Pro dipeptidase	2.65781	1.0273
Q14566	C185	DNA replication licensing factor MCM6	2.65781	1.0273
Q8IZ73	C246	RNA pseudouridylate synthase domain-containing protein 2RNA pseudouridylate synthase domain-containing pro...	2.65781	1.0273
Q9H0F6	C275	Sharpin	2.65781	1.0273
Q9H6Q4	C300	Cytosolic Fe-S cluster assembly factor NARFL	2.65781	1.0273
P78524	C307	Suppression of tumorigenicity 5 protein	2.65781	1.0273
O75592	C3360	Probable E3 ubiquitin-protein ligase MYCBP2	2.65781	1.0273
O75400	C39	Pre-mRNA-processing factor 40 homolog A	2.65781	1.0273
Q6PI48	C590	Aspartate--tRNA ligase, mitochondrial	2.65781	1.0273
P47897	C657	Glutamine--tRNA ligase	2.65781	1.0273
P49419	C70	Alpha-aminoadipic semialdehyde dehydrogenase	2.65781	1.0273
O75147	C13	Obscurin-like protein 1	2.34114	1.02397
Q9C0D5	C131	Protein TANC1	2.34114	1.02397
Q9Y6I4	C157	Ubiquitin carboxyl-terminal hydrolase 3	2.34114	1.02397
P35249	C177	Replication factor C subunit 4	2.34114	1.02397
P67936	C247	Tropomyosin alpha-4 chain	2.34114	1.02397
Q9NNW5	C26	WD repeat-containing protein 6	2.34114	1.02397
Q9P2S5	C26	WD repeat-containing protein WRAP73	2.34114	1.02397
P78371	C289	T-complex protein 1 subunit beta	2.34114	1.02397
P60660	C32	Myosin light polypeptide 6	2.34114	1.02397
Q9NZL4	C328	Hsp70-binding protein 1	2.34114	1.02397
P30307	C42	M-phase inducer phosphatase 3	2.34114	1.02397
Q8TDQ7	C48	Glucosamine-6-phosphate isomerase 2	2.34114	1.02397
P00519	C1040	Tyrosine-protein kinase ABL1	2.33333	1.02389
P09429	C106	High mobility group protein B1	2.33333	1.02389
P07858	C108	Cathepsin B	2.33333	1.02389
O76071	C123	Probable cytosolic iron-sulfur protein assembly protein CIAO1Probable cytosolic iron-sulfur protein assembly pr...	2.33333	1.02389
Q9UER7	C131	Death domain-associated protein 6	2.33333	1.02389
Q99871	C132	HAUS augmin-like complex subunit 7	2.33333	1.02389
Q8TDY2	C1413	RB1-inducible coiled-coil protein 1	2.33333	1.02389
Q13510	C143	Acid ceramidase	2.33333	1.02389
Q9ULX3	C147	RNA-binding protein NOB1	2.33333	1.02389
Q00535	C157	Cyclin-dependent kinase 5	2.33333	1.02389
P08134	C159	Rho-related GTP-binding protein RhoC	2.33333	1.02389
Q9NPB0	C159	SAYSvFN domain-containing protein 1	2.33333	1.02389
Q8NI35	C1602	InaD-like protein	2.33333	1.02389
P11766	C174	Alcohol dehydrogenase class-3	2.33333	1.02389
Q9Y2P8	C177	RNA 3'-terminal phosphate cyclase-like protein	2.33333	1.02389
Q9UPW5	C179	Cytosolic carboxypeptidase 1	2.33333	1.02389
Q9HD67	C1874	Unconventional myosin-X	2.33333	1.02389
O75822	C188	Eukaryotic translation initiation factor 3 subunit JEukaryotic translation initiation factor 3 subunit...	2.33333	1.02389
Q969T7	C202	Cytosolic 5'-nucleotidase III-like protein	2.33333	1.02389
Q15102	C205	Platelet-activating factor acetylhydrolase IB subunit gammaPlatelet-activating factor acetylhydrolase IB subu...	2.33333	1.02389
O43683	C244	Mitotic checkpoint serine/threonine-protein kinase BUB1Mitotic checkpoint serine/threonine-protein kinase...	2.33333	1.02389
P63244	C249	Guanine nucleotide-binding protein subunit beta-2-like 1Guanine nucleotide-binding protein subunit beta-2-...	2.33333	1.02389
P30307	C265	M-phase inducer phosphatase 3	2.33333	1.02389
Q14449	C27	Growth factor receptor-bound protein 14	2.33333	1.02389
P49792	C2740	E3 SUMO-protein ligase RanBP2	2.33333	1.02389
Q99961	C277	Endophilin-A2	2.33333	1.02389
H0YHG0	C333	protein	2.33333	1.02389
P07814	C336	Bifunctional glutamate/proline--tRNA ligase	2.33333	1.02389
P28702	C340	Retinoic acid receptor RXR-beta	2.33333	1.02389
P41091	C348	Eukaryotic translation initiation factor 2 subunit 3Eukaryotic translation initiation factor 2 subunit...	2.33333	1.02389
Q53EQ6	C381	Tigger transposable element-derived protein 5	2.33333	1.02389
Q9P2E5	C393	Chondroitin sulfate glucuronyltransferase	2.33333	1.02389
Q9P2R3	C395	Ankyrin repeat and FYVE domain-containing protein 1Ankyrin repeat and FYVE domain-containing protein ...	2.33333	1.02389
Q99592	C421	Zinc finger protein 238	2.33333	1.02389
Q9BV44	C426	THUMP domain-containing protein 3	2.33333	1.02389
Q15842	C43	ATP-sensitive inward rectifier potassium channel 8	2.33333	1.02389
Q08211	C438	ATP-dependent RNA helicase A	2.33333	1.02389
P27635	C49	60S ribosomal protein L10	2.33333	1.02389
O15063	C502	Uncharacterized protein KIAA0355	2.33333	1.02389
A0AVT1	C546	Ubiquitin-like modifier-activating enzyme 6	2.33333	1.02389
Q6ZRV2	C550	Protein FAM83H	2.33333	1.02389
P49327	C636	Fatty acid synthase	2.33333	1.02389
P51957	C664	Serine/threonine-protein kinase Nek4	2.33333	1.02389
Q6IBS0	C67	Twinfilin-2	2.33333	1.02389
P36776	C682	Lon protease homolog, mitochondrial	2.33333	1.02389
Q12788	C696	Transducin beta-like protein 3	2.33333	1.02389
Q9UPZ3	C707	Hermansky-Pudlak syndrome 5 protein	2.33333	1.02389
P15924	C740	Desmoplakin	2.33333	1.02389
Q8IW45	C82	ATP-dependent (S)-NAD(P)H-hydrate dehydratase	2.33333	1.02389
P62333	C83	26S protease regulatory subunit 10B	2.33333	1.02389
O94829	C838	Importin-13	2.33333	1.02389
Q9Y4B4	C841	Helicase ARIP4	2.33333	1.02389
Q9BTW9	C899	Tubulin-specific chaperone D	2.33333	1.02389
O75934	C138	Pre-mRNA-splicing factor SPF27	2.32558	1.02381
Q4KWH8	C1505	1-phosphatidylinositol 4,5-bisphosphate phosphodiesterase eta-11-phosphatidylinositol 4,5-bisphosphate phosphodie...	2.32558	1.02381
Q9NS23	C341	Ras association domain-containing protein 1	2.32558	1.02381
Q9H3R5	C35	Centromere protein H	2.32558	1.02381
O43865	C373	Putative adenosylhomocysteinase 2	2.32558	1.02381
Q13325	C476	Interferon-induced protein with tetratricopeptide repeats 5Interferon-induced protein with tetratricopeptide ...	2.32558	1.02381
Q7Z2K8	C778	G protein-regulated inducer of neurite outgrowth 1	2.32558	1.02381
O94761	C949	ATP-dependent DNA helicase Q4	2.32558	1.02381
Q15257	C103	Serine/threonine-protein phosphatase 2A activator	2.00669	1.02048
O43837	C232	Isocitrate dehydrogenase [NAD] subunit beta, mitochondrial [REVIEWED] ENSG00000101365;IPI00871304;O43837;B2RDR1;D3DVX2;D3DVX3;O95106;Q5JXS8;Q9NQ06;Q9NQ07;Q9NUZ0;Q9UEX0;Q9UG99Isocitrate dehydrogenase [NAD] subunit beta, mitoc...	2.00669	1.02048
P17987	C296	T-complex protein 1 subunit alpha	2.00669	1.02048
P62244	C30	40S ribosomal protein S15a	2.00669	1.02048
Q7Z4W1	C51	L-xylulose reductase	2.00669	1.02048
O43318	C527	Mitogen-activated protein kinase kinase kinase 7	2.00669	1.02048
O76064	C55	E3 ubiquitin-protein ligase RNF8	2.00669	1.02048
P35790	C6	Choline kinase alpha	2.00669	1.02048
P25398	C69	40S ribosomal protein S12	2.00669	1.02048
P13796	C101	Plastin-2	2	1.02041
F6WH68	C102	Regulator of telomere elongation helicase 1	2	1.02041
Q8WUM0	C1037	Nuclear pore complex protein Nup133	2	1.02041
Q86Y13	C1078	E3 ubiquitin-protein ligase DZIP3	2	1.02041
Q13613	C117	Myotubularin-related protein 1	2	1.02041
O95239	C1224	Chromosome-associated kinesin KIF4A	2	1.02041
Q2M1P5	C1229	Kinesin-like protein KIF7	2	1.02041
Q7Z333	C1262	Probable helicase senataxin	2	1.02041
A0MZ66	C140	Shootin-1	2	1.02041
O43765	C148	Small glutamine-rich tetratricopeptide repeat-containing protein alphaSmall glutamine-rich tetratricopeptide repeat-cont...	2	1.02041
Q8TEU7	C1491	Rap guanine nucleotide exchange factor 6	2	1.02041
Q9Y2I7	C1498	1-phosphatidylinositol 3-phosphate 5-kinase	2	1.02041
Q8IU81	C15	Interferon regulatory factor 2-binding protein 1	2	1.02041
Q9HAU4	C151	E3 ubiquitin-protein ligase SMURF2	2	1.02041
Q9H649	C154	Putative methyltransferase NSUN3	2	1.02041
Q9P2R7	C158	Succinyl-CoA ligase [ADP-forming] subunit beta, mitochondrial [REVIEWED] ENSG00000136143;IPI00464979;Q9P2R7;B2RDE7;O95194;Q5T9Q4;Q5T9Q6;Q9NV21;Q9NVP7Succinyl-CoA ligase [ADP-forming] subunit beta, mi...	2	1.02041
Q12888	C1796	Tumor suppressor p53-binding protein 1	2	1.02041
Q8N4J0	C18	UPF0586 protein C9orf41	2	1.02041
P61601	C185	Neurocalcin-delta	2	1.02041
Q13206	C196	Probable ATP-dependent RNA helicase DDX10	2	1.02041
P35219	C200	Carbonic anhydrase-related protein	2	1.02041
P13716	C203	Delta-aminolevulinic acid dehydratase	2	1.02041
P49327	C2202	Fatty acid synthase	2	1.02041
Q9NVU0	C227	DNA-directed RNA polymerase III subunit RPC5	2	1.02041
Q8NBE8	C245	Kelch-like protein 23	2	1.02041
O95630	C264	STAM-binding protein	2	1.02041
P62829	C28	60S ribosomal protein L23	2	1.02041
Q15084	C291	Protein disulfide-isomerase A6	2	1.02041
P15121	C299	Aldose reductase	2	1.02041
Q5JTH9	C317	RRP12-like protein	2	1.02041
Q01518	C356	Adenylyl cyclase-associated protein 1	2	1.02041
P0CB43	C374	Protein FAM203B	2	1.02041
P13489	C38	Ribonuclease inhibitor	2	1.02041
P34932	C38	Heat shock 70 kDa protein 4	2	1.02041
P48735	C418	Isocitrate dehydrogenase [NADP], mitochondrial [REVIEWED] ENSG00000182054;IPI00011107;P48735;B2R6L6;Q96GT3Isocitrate dehydrogenase [NADP], mitochondrial [RE...	2	1.02041
Q5T4S7	C4916	E3 ubiquitin-protein ligase UBR4	2	1.02041
O60264	C527	SWI/SNF-related matrix-associated actin-dependent regulator of chromatin subfamily A member 5SWI/SNF-related matrix-associated actin-dependent ...	2	1.02041
Q96R06	C544	Sperm-associated antigen 5	2	1.02041
Q8N0X7	C562	Spartin	2	1.02041
P22681	C567	E3 ubiquitin-protein ligase CBL	2	1.02041
J3QL51	C57	Protein RPL17-C18ORF32	2	1.02041
P18085	C62	ADP-ribosylation factor 4	2	1.02041
Q9UJ41	C621	Rab5 GDP/GTP exchange factor	2	1.02041
P22102	C646	Trifunctional purine biosynthetic protein adenosine-3Trifunctional purine biosynthetic protein adenosin...	2	1.02041
Q14596	C669	Next to BRCA1 gene 1 protein	2	1.02041
Q99459	C670	Cell division cycle 5-like protein	2	1.02041
Q96GX2	C70	Putative ataxin-7-like protein 3B	2	1.02041
P32969	C74	60S ribosomal protein L9	2	1.02041
Q4V328	C750	GRIP1-associated protein 1	2	1.02041
Q13905	C817	Rap guanine nucleotide exchange factor 1	2	1.02041
Q15788	C831	Nuclear receptor coactivator 1	2	1.02041
Q9UDR5	C87	Alpha-aminoadipic semialdehyde synthase, mitochondrialAlpha-aminoadipic semialdehyde synthase, mitochond...	2	1.02041
P48444	C94	Coatomer subunit delta	2	1.02041
Q9Y2L5	C978	Trafficking protein particle complex subunit 8	2	1.02041
P18074	C116	TFIIH basal transcription factor complex helicase XPD subunitTFIIH basal transcription factor complex helicase ...	1.99336	1.02034
Q9H7X7	C12	Rab-like protein 5	1.99336	1.02034
O75694	C1201	Nuclear pore complex protein Nup155	1.99336	1.02034
O14893	C154	Gem-associated protein 2	1.99336	1.02034
O75179	C2063	Ankyrin repeat domain-containing protein 17	1.99336	1.02034
Q8IWS0	C212	PHD finger protein 6	1.99336	1.02034
O95782	C283	AP-2 complex subunit alpha-1	1.99336	1.02034
Q9H4I2	C335	Zinc fingers and homeoboxes protein 3	1.99336	1.02034
Q96RT8	C574	Gamma-tubulin complex component 5	1.99336	1.02034
Q96S59	C610	Ran-binding protein 9	1.99336	1.02034
Q16875	C102	6-phosphofructo-2-kinase/fructose-2,6-bisphosphatase 36-phosphofructo-2-kinase/fructose-2,6-bisphosphata...	1.67224	1.01701
Q16877	C106	6-phosphofructo-2-kinase/fructose-2,6-bisphosphatase 46-phosphofructo-2-kinase/fructose-2,6-bisphosphata...	1.67224	1.01701
Q9H4A6	C108	Golgi phosphoprotein 3	1.67224	1.01701
O00151	C307	PDZ and LIM domain protein 1	1.67224	1.01701
Q9Y3E5	C36	Peptidyl-tRNA hydrolase 2, mitochondrial	1.67224	1.01701
P54577	C501	Tyrosine--tRNA ligase, cytoplasmic	1.67224	1.01701
Q14166	C572	Tubulin--tyrosine ligase-like protein 12	1.67224	1.01701
Q92615	C590	La-related protein 4B	1.67224	1.01701
Q9BWJ5	C82	Splicing factor 3B subunit 5	1.67224	1.01701
Q53H54	C101	tRNA wybutosine-synthesizing protein 2 homolog	1.66667	1.01695
Q9BSD7	C101	Cancer-related nucleoside-triphosphatase	1.66667	1.01695
Q99797	C116	Mitochondrial intermediate peptidase	1.66667	1.01695
Q9NYR9	C122	NF-kappa-B inhibitor-interacting Ras-like protein 2NF-kappa-B inhibitor-interacting Ras-like protein ...	1.66667	1.01695
P60174	C130	Triosephosphate isomerase	1.66667	1.01695
P26358	C1339	DNA (cytosine-5)-methyltransferase 1	1.66667	1.01695
P60981	C135	Destrin	1.66667	1.01695
Q8IY17	C1354	Neuropathy target esterase	1.66667	1.01695
Q5T5Y3	C1386	Calmodulin-regulated spectrin-associated protein 1	1.66667	1.01695
O60684	C139	Importin subunit alpha-7	1.66667	1.01695
P32969	C140	60S ribosomal protein L9	1.66667	1.01695
P21964	C145	Catechol O-methyltransferase	1.66667	1.01695
P56537	C15	Eukaryotic translation initiation factor 6	1.66667	1.01695
Q8TEQ6	C1503	Gem-associated protein 5	1.66667	1.01695
Q9P000	C160	COMM domain-containing protein 9	1.66667	1.01695
Q96C19	C172	EF-hand domain-containing protein D2	1.66667	1.01695
O00411	C184	DNA-directed RNA polymerase, mitochondrial	1.66667	1.01695
O60287	C1900	Nucleolar pre-ribosomal-associated protein 1	1.66667	1.01695
P61221	C201	ATP-binding cassette sub-family E member 1	1.66667	1.01695
Q92685	C21	Dol-P-Man:Man(5)GlcNAc(2)-PP-Dol alpha-1,3-mannosyltransferaseDol-P-Man:Man(5)GlcNAc(2)-PP-Dol alpha-1,3-mannosy...	1.66667	1.01695
P60891	C236	Ribose-phosphate pyrophosphokinase 1	1.66667	1.01695
Q9H9Q2	C240	COP9 signalosome complex subunit 7b	1.66667	1.01695
P35250	C255	Replication factor C subunit 2	1.66667	1.01695
Q53GL0	C269	Pleckstrin homology domain-containing family O member 1Pleckstrin homology domain-containing family O mem...	1.66667	1.01695
Q9Y6Y0	C274	Influenza virus NS1A-binding protein	1.66667	1.01695
Q5R3I4	C28	Tetratricopeptide repeat protein 38	1.66667	1.01695
Q9NYL2	C285	Mitogen-activated protein kinase kinase kinase MLT	1.66667	1.01695
Q5RI15	C29	Cytochrome c oxidase protein 20 homolog	1.66667	1.01695
Q8IZD4	C291	mRNA-decapping enzyme 1B	1.66667	1.01695
Q7Z3T8	C292	Zinc finger FYVE domain-containing protein 16	1.66667	1.01695
Q04727	C32	Transducin-like enhancer protein 4	1.66667	1.01695
O95394	C348	Phosphoacetylglucosamine mutase	1.66667	1.01695
Q7Z7E8	C351	Ubiquitin-conjugating enzyme E2 Q1	1.66667	1.01695
Q8NA72	C360	Centrosomal protein POC5	1.66667	1.01695
Q14CX7	C381	N-alpha-acetyltransferase 25, NatB auxiliary subunitN-alpha-acetyltransferase 25, NatB auxiliary subun...	1.66667	1.01695
Q8IWA0	C397	WD repeat-containing protein 75	1.66667	1.01695
P49368	C404	T-complex protein 1 subunit gamma	1.66667	1.01695
Q9UIA9	C43	Exportin-7	1.66667	1.01695
P49207	C49	60S ribosomal protein L34	1.66667	1.01695
O00186	C501	Syntaxin-binding protein 3	1.66667	1.01695
Q8IUH4	C51	Palmitoyltransferase ZDHHC13	1.66667	1.01695
Q15813	C522	Tubulin-specific chaperone E	1.66667	1.01695
Q9UNY4	C522	Transcription termination factor 2	1.66667	1.01695
Q04727	C529	Transducin-like enhancer protein 4	1.66667	1.01695
Q99575	C530	Ribonucleases P/MRP protein subunit POP1	1.66667	1.01695
Q99590	C542	Protein SCAF11	1.66667	1.01695
Q8IZE3	C553	Protein-associating with the carboxyl-terminal domain of ezrinProtein-associating with the carboxyl-terminal dom...	1.66667	1.01695
P61513	C60	60S ribosomal protein L37a	1.66667	1.01695
Q8N594	C63	MPN domain-containing protein	1.66667	1.01695
P52630	C74	Signal transducer and activator of transcription 2	1.66667	1.01695
Q9NXC5	C748	WD repeat-containing protein mio	1.66667	1.01695
P35251	C767	Replication factor C subunit 1	1.66667	1.01695
P11586	C785	C-1-tetrahydrofolate synthase, cytoplasmic	1.66667	1.01695
P27708	C79	CAD protein	1.66667	1.01695
Q9H8H3	C79	Methyltransferase-like protein 7A	1.66667	1.01695
Q8IYQ7	C82	Threonine synthase-like 1	1.66667	1.01695
Q8TBC4	C82	NEDD8-activating enzyme E1 catalytic subunit	1.66667	1.01695
Q9NXH9	C86	tRNA (guanine(26)-N(2))-dimethyltransferase	1.66667	1.01695
Q12770	C914	Sterol regulatory element-binding protein cleavage-activating proteinSterol regulatory element-binding protein cleavage...	1.66667	1.01695
Q9BYB4	C93	Guanine nucleotide-binding protein subunit beta-like protein 1Guanine nucleotide-binding protein subunit beta-li...	1.66667	1.01695
Q9UII4	C994	E3 ISG15--protein ligase HERC5	1.66667	1.01695
Q15477	C247	Helicase SKI2W	1.66113	1.01689
Q9H9A6	C264	Leucine-rich repeat-containing protein 40	1.66113	1.01689
Q96GX5	C285	Serine/threonine-protein kinase greatwall	1.66113	1.01689
Q86UY6	C32	N-alpha-acetyltransferase 40	1.66113	1.01689
P53634	C331	Dipeptidyl peptidase 1	1.66113	1.01689
O75439	C389	Mitochondrial-processing peptidase subunit beta	1.66113	1.01689
Q9BUK6	C485	Protein misato homolog 1	1.66113	1.01689
Q96JP5	C520	E3 ubiquitin-protein ligase ZFP91	1.66113	1.01689
Q9H9P5	C595	Putative E3 ubiquitin-protein ligase UNKL	1.66113	1.01689
Q96ES7	C74	SAGA-associated factor 29 homolog	1.66113	1.01689
Q2M1P5	C1283	Kinesin-like protein KIF7	1.33779	1.01356
Q9UKV8	C188	Protein argonaute-2	1.33779	1.01356
Q6P1M0	C232	Long-chain fatty acid transport protein 4	1.33779	1.01356
Q9H0G5	C267	Nuclear speckle splicing regulatory protein 1	1.33779	1.01356
Q8TEP8	C286	Centrosomal protein of 192 kDa	1.33779	1.01356
Q96D70	C29	R3H domain-containing protein 4	1.33779	1.01356
P25705	C294	ATP synthase subunit alpha, mitochondrial	1.33779	1.01356
Q9NSK0	C318	Kinesin light chain 4	1.33779	1.01356
Q9NVN8	C490	Guanine nucleotide-binding protein-like 3-like proteinGuanine nucleotide-binding protein-like 3-like pro...	1.33779	1.01356
Q52LJ0	C63	Protein FAM98B	1.33779	1.01356
Q9BXJ9	C721	N-alpha-acetyltransferase 15, NatA auxiliary subunitN-alpha-acetyltransferase 15, NatA auxiliary subun...	1.33779	1.01356
P55010	C102	Eukaryotic translation initiation factor 5	1.33333	1.01351
Q9NR31	C102	GTP-binding protein SAR1a	1.33333	1.01351
Q8NI27	C1064	THO complex subunit 2	1.33333	1.01351
P47755	C111	F-actin-capping protein subunit alpha-2	1.33333	1.01351
Q9BWT3	C117	Poly(A) polymerase gamma	1.33333	1.01351
P51003	C118	Poly(A) polymerase alpha	1.33333	1.01351
P21964	C119	Catechol O-methyltransferase	1.33333	1.01351
P50991	C120	T-complex protein 1 subunit delta	1.33333	1.01351
Q9Y4F5	C1204	Protein KIAA0284	1.33333	1.01351
Q7L2H7	C125	Eukaryotic translation initiation factor 3 subunit MEukaryotic translation initiation factor 3 subunit...	1.33333	1.01351
Q9Y4E5	C133	Zinc finger protein 451	1.33333	1.01351
P46060	C141	Ran GTPase-activating protein 1	1.33333	1.01351
Q96AE4	C148	Far upstream element-binding protein 1	1.33333	1.01351
Q96RP9	C153	Elongation factor G, mitochondrial	1.33333	1.01351
P12004	C162	Proliferating cell nuclear antigen	1.33333	1.01351
Q9HCJ0	C1637	Trinucleotide repeat-containing gene 6C protein	1.33333	1.01351
Q92598	C167	Heat shock protein 105 kDa	1.33333	1.01351
O95455	C175	dTDP-D-glucose 4,6-dehydratase	1.33333	1.01351
Q96PE2	C176	Rho guanine nucleotide exchange factor 17	1.33333	1.01351
Q9BSD7	C184	Cancer-related nucleoside-triphosphatase	1.33333	1.01351
Q9ULT8	C1855	E3 ubiquitin-protein ligase HECTD1	1.33333	1.01351
P30520	C188	Adenylosuccinate synthetase isozyme 2	1.33333	1.01351
Q9Y296	C195	Trafficking protein particle complex subunit 4	1.33333	1.01351
Q9UKT4	C202	F-box only protein 5	1.33333	1.01351
Q9P258	C209	Protein RCC2	1.33333	1.01351
O95071	C2094	E3 ubiquitin-protein ligase UBR5	1.33333	1.01351
Q92990	C218	Glomulin	1.33333	1.01351
Q9BZZ5	C234	Apoptosis inhibitor 5	1.33333	1.01351
Q96JC1	C235	Vam6/Vps39-like protein	1.33333	1.01351
Q9Y295	C243	Developmentally-regulated GTP-binding protein 1	1.33333	1.01351
O00487	C244	26S proteasome non-ATPase regulatory subunit 14	1.33333	1.01351
P49674	C255	Casein kinase I isoform epsilon	1.33333	1.01351
Q92610	C265	Zinc finger protein 592	1.33333	1.01351
Q9GZT4	C269	Serine racemase	1.33333	1.01351
Q08999	C274	Retinoblastoma-like protein 2	1.33333	1.01351
Q9P287	C275	BRCA2 and CDKN1A-interacting protein	1.33333	1.01351
P29966	C279	Myristoylated alanine-rich C-kinase substrate	1.33333	1.01351
O60831	C28	PRA1 family protein 2	1.33333	1.01351
Q05655	C28	Protein kinase C delta type	1.33333	1.01351
Q08752	C282	Peptidyl-prolyl cis-trans isomerase D	1.33333	1.01351
O75794	C289	Cell division cycle protein 123 homolog	1.33333	1.01351
Q86Y37	C362	CDK2-associated and cullin domain-containing protein 1CDK2-associated and cullin domain-containing prote...	1.33333	1.01351
Q8IU81	C363	Interferon regulatory factor 2-binding protein 1	1.33333	1.01351
Q9BVS4	C367	Serine/threonine-protein kinase RIO2	1.33333	1.01351
Q9Y570	C381	Protein phosphatase methylesterase 1	1.33333	1.01351
O00116	C404	Alkyldihydroxyacetonephosphate synthase, peroxisomalAlkyldihydroxyacetonephosphate synthase, peroxisom...	1.33333	1.01351
Q14152	C404	Eukaryotic translation initiation factor 3 subunit AEukaryotic translation initiation factor 3 subunit...	1.33333	1.01351
Q9UPZ3	C431	Hermansky-Pudlak syndrome 5 protein	1.33333	1.01351
Q9HAV4	C44	Exportin-5	1.33333	1.01351
P15170	C453	Eukaryotic peptide chain release factor GTP-binding subunit ERF3AEukaryotic peptide chain release factor GTP-bindin...	1.33333	1.01351
P24928	C457	DNA-directed RNA polymerase II subunit RPB1	1.33333	1.01351
P41250	C461	Glycine--tRNA ligase	1.33333	1.01351
O60684	C467	Importin subunit alpha-7	1.33333	1.01351
Q8IW35	C484	Centrosomal protein of 97 kDa	1.33333	1.01351
Q86YR5	C515	G-protein-signaling modulator 1	1.33333	1.01351
Q5T3J3	C524	Ligand-dependent nuclear receptor-interacting factor 1Ligand-dependent nuclear receptor-interacting fact...	1.33333	1.01351
Q6P0N0	C528	Mis18-binding protein 1	1.33333	1.01351
Q8IYL2	C530	Probable tRNA (uracil-O(2)-)-methyltransferase	1.33333	1.01351
O60287	C541	Nucleolar pre-ribosomal-associated protein 1	1.33333	1.01351
Q8IYD1	C582	Eukaryotic peptide chain release factor GTP-binding subunit ERF3BEukaryotic peptide chain release factor GTP-bindin...	1.33333	1.01351
Q8IVT5	C60	Kinase suppressor of Ras 1	1.33333	1.01351
Q93075	C602	Putative deoxyribonuclease TATDN2	1.33333	1.01351
P19367	C628	Hexokinase-1	1.33333	1.01351
P17858	C630	6-phosphofructokinase, liver type	1.33333	1.01351
P26639	C656	Threonine--tRNA ligase, cytoplasmic	1.33333	1.01351
Q9H6R4	C665	Nucleolar protein 6	1.33333	1.01351
Q9BWU0	C774	Kanadaptin	1.33333	1.01351
Q9BQ15	C81	SOSS complex subunit B1	1.33333	1.01351
Q96T76	C819	MMS19 nucleotide excision repair protein homolog	1.33333	1.01351
P19367	C886	Hexokinase-1	1.33333	1.01351
H3BMV2	C91	Protein C17orf103	1.33333	1.01351
P08151	C998	Zinc finger protein GLI1	1.33333	1.01351
P60174	C104	Triosephosphate isomerase	1.3289	1.01347
Q9UNH7	C155	Sorting nexin-6	1.3289	1.01347
Q99592	C238	Zinc finger protein 238	1.3289	1.01347
Q8N1F7	C397	Nuclear pore complex protein Nup93	1.3289	1.01347
Q07889	C405	Son of sevenless homolog 1	1.3289	1.01347
Q9UHI6	C758	Probable ATP-dependent RNA helicase DDX20	1.3289	1.01347
Q969T9	C80	WW domain-binding protein 2	1.3289	1.01347
P53618	C877	Coatomer subunit beta	1.3289	1.01347
P39023	C114	60S ribosomal protein L3	1.00334	1.01014
Q9Y2X7	C122	ARF GTPase-activating protein GIT1	1.00334	1.01014
Q9NZN5	C1325	Rho guanine nucleotide exchange factor 12	1.00334	1.01014
P60520	C15	Gamma-aminobutyric acid receptor-associated protein-like 2Gamma-aminobutyric acid receptor-associated protei...	1.00334	1.01014
Q7Z4H8	C156	KDEL motif-containing protein 2	1.00334	1.01014
Q5T4F4	C165	Protrudin	1.00334	1.01014
Q9GZT9	C208	Egl nine homolog 1	1.00334	1.01014
Q13772	C244	Nuclear receptor coactivator 4	1.00334	1.01014
Q8N5A5	C322	Zinc finger CCCH-type with G patch domain-containing proteinZinc finger CCCH-type with G patch domain-containi...	1.00334	1.01014
P09211	C48	Glutathione S-transferase P	1.00334	1.01014
Q9BQ52	C609	Zinc phosphodiesterase ELAC protein 2	1.00334	1.01014
Q9BPX3	C843	Condensin complex subunit 3	1.00334	1.01014
P62241	C100	40S ribosomal protein S8	1	1.0101
Q9BSD7	C110	Cancer-related nucleoside-triphosphatase	1	1.0101
P62487	C112	DNA-directed RNA polymerase II subunit RPB7	1	1.0101
P61081	C117	NEDD8-conjugating enzyme Ubc12	1	1.0101
P55196	C1206	Afadin	1	1.0101
O15014	C1290	Zinc finger protein 609	1	1.0101
Q9NWA0	C139	Mediator of RNA polymerase II transcription subunit 9Mediator of RNA polymerase II transcription subuni...	1	1.0101
P47756	C147	F-actin-capping protein subunit beta	1	1.0101
Q8WZA9	C152	Immunity-related GTPase family Q protein	1	1.0101
P60510	C17	Serine/threonine-protein phosphatase 4 catalytic subunitSerine/threonine-protein phosphatase 4 catalytic s...	1	1.0101
Q9BY84	C170	Dual specificity protein phosphatase 16	1	1.0101
Q9H974	C174	Queuine tRNA-ribosyltransferase subunit QTRTD1	1	1.0101
Q9H2U2	C180	Inorganic pyrophosphatase 2, mitochondrial	1	1.0101
P15880	C188	40S ribosomal protein S2	1	1.0101
Q9NQ29	C190	Putative RNA-binding protein Luc7-like 1	1	1.0101
Q9Y383	C190	Putative RNA-binding protein Luc7-like 2	1	1.0101
Q9H6Y2	C191	WD repeat-containing protein 55	1	1.0101
O00743	C192	Serine/threonine-protein phosphatase 6 catalytic subunitSerine/threonine-protein phosphatase 6 catalytic s...	1	1.0101
O43683	C201	Mitotic checkpoint serine/threonine-protein kinase BUB1Mitotic checkpoint serine/threonine-protein kinase...	1	1.0101
P33992	C221	DNA replication licensing factor MCM5	1	1.0101
Q9Y5Q0	C24	Fatty acid desaturase 3	1	1.0101
O75179	C242	Ankyrin repeat domain-containing protein 17	1	1.0101
P60891	C265	Ribose-phosphate pyrophosphokinase 1	1	1.0101
Q7Z6J9	C277	tRNA-splicing endonuclease subunit Sen54	1	1.0101
P11172	C278	Uridine 5'-monophosphate synthase	1	1.0101
Q9NWY4	C29	UPF0609 protein C4orf27	1	1.0101
O43353	C324	Receptor-interacting serine/threonine-protein kinase 2Receptor-interacting serine/threonine-protein kina...	1	1.0101
Q9BWD1	C360	Acetyl-CoA acetyltransferase, cytosolic	1	1.0101
P49368	C366	T-complex protein 1 subunit gamma	1	1.0101
Q9BSJ8	C370	Extended synaptotagmin-1	1	1.0101
P30153	C390	Serine/threonine-protein phosphatase 2A 65 kDa regulatory subunit A alpha isoformSerine/threonine-protein phosphatase 2A 65 kDa reg...	1	1.0101
P30154	C402	Serine/threonine-protein phosphatase 2A 65 kDa regulatory subunit A beta isoformSerine/threonine-protein phosphatase 2A 65 kDa reg...	1	1.0101
Q52LR7	C420	Enhancer of polycomb homolog 2	1	1.0101
O00483	C44	NADH dehydrogenase [ubiquinone] 1 alpha subcomplex subunit 4 [REVIEWED] ENSG00000189043;IPI00011770;O00483;A4D109;Q6FHN5NADH dehydrogenase [ubiquinone] 1 alpha subcomplex...	1	1.0101
P23368	C441	NAD-dependent malic enzyme, mitochondrial	1	1.0101
P41134	C45	DNA-binding protein inhibitor ID-1	1	1.0101
A0AVK6	C450	Transcription factor E2F8	1	1.0101
A0AVT1	C455	Ubiquitin-like modifier-activating enzyme 6	1	1.0101
P16615	C471	Sarcoplasmic/endoplasmic reticulum calcium ATPase 2Sarcoplasmic/endoplasmic reticulum calcium ATPase ...	1	1.0101
O43719	C480	HIV Tat-specific factor 1	1	1.0101
Q9BW92	C506	Threonine--tRNA ligase, mitochondrial	1	1.0101
Q9NUQ6	C536	SPATS2-like protein	1	1.0101
Q93008	C540	Probable ubiquitin carboxyl-terminal hydrolase FAF-XProbable ubiquitin carboxyl-terminal hydrolase FAF...	1	1.0101
Q9C0D2	C540	Centrosomal protein KIAA1731	1	1.0101
Q14181	C554	DNA polymerase alpha subunit B	1	1.0101
P12955	C58	Xaa-Pro dipeptidase	1	1.0101
O00233	C59	26S proteasome non-ATPase regulatory subunit 9	1	1.0101
Q96EA4	C602	Protein Spindly	1	1.0101
Q9BWT3	C604	Poly(A) polymerase gamma	1	1.0101
Q6P1K2	C61	Polyamine-modulated factor 1	1	1.0101
O14910	C62	Protein lin-7 homolog A	1	1.0101
P22234	C63	Multifunctional protein ADE2	1	1.0101
Q9BWD1	C65	Acetyl-CoA acetyltransferase, cytosolic	1	1.0101
Q9HC77	C672	Centromere protein J	1	1.0101
O15360	C69	Fanconi anemia group A protein	1	1.0101
Q9UPN3	C7344	Microtubule-actin cross-linking factor 1, isoforms 1/2/3/5Microtubule-actin cross-linking factor 1, isoforms...	1	1.0101
Q13200	C779	26S proteasome non-ATPase regulatory subunit 2	1	1.0101
P31040	C89	Succinate dehydrogenase [ubiquinone] flavoprotein subunit, mitochondrial [REVIEWED] ENSG00000073578;IPI00305166;P31040;A8K5J6;Q16395;Q9UMY5Succinate dehydrogenase [ubiquinone] flavoprotein ...	1	1.0101
Q9UBB4	C92	Ataxin-10	1	1.0101
P36969	C93	Phospholipid hydroperoxide glutathione peroxidase, mitochondrialPhospholipid hydroperoxide glutathione peroxidase,...	1	1.0101
Q9H0E3	C951	Histone deacetylase complex subunit SAP130	1	1.0101
P13796	C140	Plastin-2	0.996678	1.01007
Q5VUA4	C2040	Zinc finger protein 318	0.996678	1.01007
Q02750	C207	Dual specificity mitogen-activated protein kinase kinase 1Dual specificity mitogen-activated protein kinase ...	0.996678	1.01007
P36507	C211	Dual specificity mitogen-activated protein kinase kinase 2Dual specificity mitogen-activated protein kinase ...	0.996678	1.01007
Q15291	C257	Retinoblastoma-binding protein 5	0.996678	1.01007
Q13045	C289	Protein flightless-1 homolog	0.996678	1.01007
Q96T21	C291	Selenocysteine insertion sequence-binding protein 2Selenocysteine insertion sequence-binding protein ...	0.996678	1.01007
P17987	C302	T-complex protein 1 subunit alpha	0.996678	1.01007
O60884	C308	DnaJ homolog subfamily A member 2	0.996678	1.01007
Q15572	C425	TATA box-binding protein-associated factor RNA polymerase I subunit CTATA box-binding protein-associated factor RNA pol...	0.996678	1.01007
Q9BTA9	C615	WW domain-containing adapter protein with coiled-coilWW domain-containing adapter protein with coiled-c...	0.996678	1.01007
O43847	C62	Nardilysin	0.996678	1.01007
Q96QK1	C653	Vacuolar protein sorting-associated protein 35	0.996678	1.01007
Q9NSV4	C680	Protein diaphanous homolog 3	0.996678	1.01007
Q5XPI4	C1180	E3 ubiquitin-protein ligase RNF123	0.668896	1.00673
Q16658	C121	Fascin	0.668896	1.00673
Q15751	C1388	Probable E3 ubiquitin-protein ligase HERC1	0.668896	1.00673
Q9H4A4	C151	Aminopeptidase B	0.668896	1.00673
P23508	C174	Colorectal mutant cancer protein	0.668896	1.00673
O75165	C2181	DnaJ homolog subfamily C member 13	0.668896	1.00673
O75592	C3152	Probable E3 ubiquitin-protein ligase MYCBP2	0.668896	1.00673
Q8NHP8	C342	Putative phospholipase B-like 2	0.668896	1.00673
P43490	C39	Nicotinamide phosphoribosyltransferase	0.668896	1.00673
P26358	C41	DNA (cytosine-5)-methyltransferase 1	0.668896	1.00673
O00505	C417	Importin subunit alpha-3	0.668896	1.00673
Q5T1R4	C645	Transcription factor HIVEP3	0.668896	1.00673
Q96RT8	C670	Gamma-tubulin complex component 5	0.668896	1.00673
P51114	C77	Fragile X mental retardation syndrome-related protein 1Fragile X mental retardation syndrome-related prot...	0.668896	1.00673
O94992	C79	Protein HEXIM1	0.668896	1.00673
P36969	C102	Phospholipid hydroperoxide glutathione peroxidase, mitochondrialPhospholipid hydroperoxide glutathione peroxidase,...	0.666667	1.00671
Q14674	C1027	Separin	0.666667	1.00671
Q9NXL9	C106	DNA helicase MCM9	0.666667	1.00671
P09884	C1085	DNA polymerase alpha catalytic subunit	0.666667	1.00671
Q00610	C1102	Clathrin heavy chain 1	0.666667	1.00671
Q04917	C112	14-3-3 protein eta	0.666667	1.00671
Q9ULC4	C113	Malignant T-cell-amplified sequence 1	0.666667	1.00671
Q5JSZ5	C1245	Protein PRRC2B	0.666667	1.00671
O43379	C1300	WD repeat-containing protein 62	0.666667	1.00671
Q2NL82	C132	Pre-rRNA-processing protein TSR1 homolog	0.666667	1.00671
Q96AE4	C132	Far upstream element-binding protein 1	0.666667	1.00671
P23396	C134	40S ribosomal protein S3	0.666667	1.00671
Q9Y3T6	C134	R3H and coiled-coil domain-containing protein 1	0.666667	1.00671
Q9P2S5	C135	WD repeat-containing protein WRAP73	0.666667	1.00671
P63279	C138	SUMO-conjugating enzyme UBC9	0.666667	1.00671
P10071	C1386	Transcriptional activator GLI3	0.666667	1.00671
P78527	C1499	DNA-dependent protein kinase catalytic subunit	0.666667	1.00671
P42695	C15	Condensin-2 complex subunit D3	0.666667	1.00671
Q9NVI1	C156	Fanconi anemia group I protein	0.666667	1.00671
O60232	C158	Sjoegren syndrome/scleroderma autoantigen 1	0.666667	1.00671
Q9P258	C158	Protein RCC2	0.666667	1.00671
Q9UPY3	C1621	Endoribonuclease Dicer	0.666667	1.00671
Q13439	C1729	Golgin subfamily A member 4	0.666667	1.00671
Q14008	C1795	Cytoskeleton-associated protein 5	0.666667	1.00671
Q9UG63	C186	ATP-binding cassette sub-family F member 2	0.666667	1.00671
Q9UHR6	C188	Zinc finger HIT domain-containing protein 2	0.666667	1.00671
Q3B726	C193	DNA-directed RNA polymerase I subunit RPA43	0.666667	1.00671
Q9Y2K1	C193	Zinc finger and BTB domain-containing protein 1	0.666667	1.00671
A6NHR9	C1982	Structural maintenance of chromosomes flexible hinge domain-containing protein 1Structural maintenance of chromosomes flexible hin...	0.666667	1.00671
P31150	C202	Rab GDP dissociation inhibitor alpha	0.666667	1.00671
Q8TF64	C209	PDZ domain-containing protein GIPC3	0.666667	1.00671
Q9UHD1	C211	Cysteine and histidine-rich domain-containing protein 1Cysteine and histidine-rich domain-containing prot...	0.666667	1.00671
Q9BXJ9	C214	N-alpha-acetyltransferase 15, NatA auxiliary subunitN-alpha-acetyltransferase 15, NatA auxiliary subun...	0.666667	1.00671
O75818	C219	Ribonuclease P protein subunit p40	0.666667	1.00671
P09936	C220	Ubiquitin carboxyl-terminal hydrolase isozyme L1	0.666667	1.00671
P52292	C223	Importin subunit alpha-2	0.666667	1.00671
Q9BWU0	C224	Kanadaptin	0.666667	1.00671
Q9H8W4	C225	Pleckstrin homology domain-containing family F member 2Pleckstrin homology domain-containing family F mem...	0.666667	1.00671
P35227	C233	Polycomb group RING finger protein 2	0.666667	1.00671
Q8IUC4	C25	Rhophilin-2	0.666667	1.00671
P23378	C250	Glycine dehydrogenase [decarboxylating], mitochondrial [REVIEWED] ENSG00000178445;IPI00843789;P23378;Q2M2F8Glycine dehydrogenase [decarboxylating], mitochond...	0.666667	1.00671
Q9BTY2	C277	Plasma alpha-L-fucosidase	0.666667	1.00671
Q8TCU4	C2878	Alstrom syndrome protein 1	0.666667	1.00671
P31689	C302	DnaJ homolog subfamily A member 1	0.666667	1.00671
Q96ED9	C317	Protein Hook homolog 2	0.666667	1.00671
O95453	C323	Poly(A)-specific ribonuclease PARN	0.666667	1.00671
P12268	C331	Inosine-5'-monophosphate dehydrogenase 2	0.666667	1.00671
Q96P11	C343	Putative methyltransferase NSUN5	0.666667	1.00671
P06132	C35	Uroporphyrinogen decarboxylase	0.666667	1.00671
Q9UJA3	C351	DNA helicase MCM8	0.666667	1.00671
P43034	C356	Platelet-activating factor acetylhydrolase IB subunit alphaPlatelet-activating factor acetylhydrolase IB subu...	0.666667	1.00671
Q9BYV9	C370	Transcription regulator protein BACH2	0.666667	1.00671
Q96RS6	C376	NudC domain-containing protein 1	0.666667	1.00671
P30153	C377	Serine/threonine-protein phosphatase 2A 65 kDa regulatory subunit A alpha isoformSerine/threonine-protein phosphatase 2A 65 kDa reg...	0.666667	1.00671
P78371	C395	T-complex protein 1 subunit beta	0.666667	1.00671
Q8TB52	C396	F-box only protein 30	0.666667	1.00671
P07947	C42	Tyrosine-protein kinase Yes	0.666667	1.00671
Q9UL63	C446	Muskelin	0.666667	1.00671
Q92674	C450	Centromere protein I	0.666667	1.00671
Q8WXH0	C4629	Nesprin-2	0.666667	1.00671
Q8IZ83	C467	Aldehyde dehydrogenase family 16 member A1	0.666667	1.00671
P40939	C470	Trifunctional enzyme subunit alpha, mitochondrial	0.666667	1.00671
P41214	C489	Eukaryotic translation initiation factor 2D	0.666667	1.00671
Q9NSD9	C548	Phenylalanine--tRNA ligase beta subunit	0.666667	1.00671
Q7KZF4	C560	Staphylococcal nuclease domain-containing protein 1Staphylococcal nuclease domain-containing protein ...	0.666667	1.00671
Q13370	C597	cGMP-inhibited 3',5'-cyclic phosphodiesterase B	0.666667	1.00671
Q5VU43	C603	Myomegalin	0.666667	1.00671
Q5T9A4	C606	ATPase family AAA domain-containing protein 3B	0.666667	1.00671
Q15436	C61	Protein transport protein Sec23A	0.666667	1.00671
Q6PJI9	C706	WD repeat-containing protein 59	0.666667	1.00671
P38117	C71	Electron transfer flavoprotein subunit beta	0.666667	1.00671
Q2NKX8	C825	DNA excision repair protein ERCC-6-like	0.666667	1.00671
Q9HD67	C935	Unconventional myosin-X	0.666667	1.00671
P34896	C96	Serine hydroxymethyltransferase, cytosolic	0.666667	1.00671
Q9BWH6	C1039	RNA polymerase II-associated protein 1	0.664452	1.00669
Q9UBE0	C146	SUMO-activating enzyme subunit 1	0.664452	1.00669
Q7Z4H7	C208	HAUS augmin-like complex subunit 6	0.664452	1.00669
Q9BZH6	C297	WD repeat-containing protein 11	0.664452	1.00669
Q7Z4G1	C41	COMM domain-containing protein 6	0.664452	1.00669
Q6ZSJ8	C61	Uncharacterized protein C1orf122	0.664452	1.00669
P49585	C73	Choline-phosphate cytidylyltransferase A	0.664452	1.00669
Q7Z2W4	C831	Zinc finger CCCH-type antiviral protein 1	0.664452	1.00669
P49773	C84	Histidine triad nucleotide-binding protein 1	0.664452	1.00669
P53621	C921	Coatomer subunit alpha	0.664452	1.00669
Q9H9Y6	C1061	DNA-directed RNA polymerase I subunit RPA2	0.334448	1.00336
P09884	C1403	DNA polymerase alpha catalytic subunit	0.334448	1.00336
P07814	C1453	Bifunctional glutamate/proline--tRNA ligase	0.334448	1.00336
Q92547	C1463	DNA topoisomerase 2-binding protein 1	0.334448	1.00336
P42356	C2023	Phosphatidylinositol 4-kinase alpha	0.334448	1.00336
Q53LP3	C221	Ankyrin repeat domain-containing protein SOWAHC	0.334448	1.00336
Q7Z6Z7	C3385	E3 ubiquitin-protein ligase HUWE1	0.334448	1.00336
Q8NHY2	C370	E3 ubiquitin-protein ligase RFWD2	0.334448	1.00336
Q8TEX9	C962	Importin-4	0.334448	1.00336
P25789	C115	Proteasome subunit alpha type-4	0.333333	1.00334
P35573	C126	Glycogen debranching enzyme	0.333333	1.00334
Q9ULJ3	C129	Zinc finger protein 295	0.333333	1.00334
Q8IZH2	C1304	5'-3' exoribonuclease 1	0.333333	1.00334
P36969	C134	Phospholipid hydroperoxide glutathione peroxidase, mitochondrialPhospholipid hydroperoxide glutathione peroxidase,...	0.333333	1.00334
P13797	C143	Plastin-3	0.333333	1.00334
Q9BUT1	C145	3-hydroxybutyrate dehydrogenase type 2	0.333333	1.00334
P22570	C152	NADPH:adrenodoxin oxidoreductase, mitochondrial	0.333333	1.00334
O95456	C157	Proteasome assembly chaperone 1	0.333333	1.00334
Q12904	C161	Aminoacyl tRNA synthase complex-interacting multifunctional protein 1Aminoacyl tRNA synthase complex-interacting multif...	0.333333	1.00334
Q9BUR4	C183	Telomerase Cajal body protein 1	0.333333	1.00334
Q96L73	C2077	Histone-lysine N-methyltransferase, H3 lysine-36 and H4 lysine-20 specificHistone-lysine N-methyltransferase, H3 lysine-36 a...	0.333333	1.00334
P07199	C212	Major centromere autoantigen B	0.333333	1.00334
Q9P2X3	C226	Protein IMPACT	0.333333	1.00334
O95644	C228	Nuclear factor of activated T-cells, cytoplasmic 1	0.333333	1.00334
P53384	C235	Cytosolic Fe-S cluster assembly factor NUBP1	0.333333	1.00334
Q8WUA2	C25	Peptidyl-prolyl cis-trans isomerase-like 4	0.333333	1.00334
Q96SI9	C254	Spermatid perinuclear RNA-binding protein	0.333333	1.00334
P19838	C261	Nuclear factor NF-kappa-B p105 subunit	0.333333	1.00334
O75486	C274	Transcription initiation protein SPT3 homolog	0.333333	1.00334
Q99614	C28	Tetratricopeptide repeat protein 1	0.333333	1.00334
Q14149	C307	MORC family CW-type zinc finger protein 3	0.333333	1.00334
Q8IWC1	C315	MAP7 domain-containing protein 3	0.333333	1.00334
O15014	C345	Zinc finger protein 609	0.333333	1.00334
Q14974	C345	Importin subunit beta-1	0.333333	1.00334
Q9P2J9	C345	[Pyruvate dehydrogenase [acetyl-transferring]]-phosphatase 2, mitochondrial [REVIEWED] ENSG00000172840;IPI00002251;Q9P2J9;A8K924[Pyruvate dehydrogenase [acetyl-transferring]]-pho...	0.333333	1.00334
P50213	C359	Isocitrate dehydrogenase [NAD] subunit alpha, mitochondrial [REVIEWED] ENSG00000166411;IPI00792971;P50213;D3DW83;Q9H3X0Isocitrate dehydrogenase [NAD] subunit alpha, mito...	0.333333	1.00334
Q6ZRI6	C367	Uncharacterized protein C15orf39	0.333333	1.00334
Q9UBB4	C382	Ataxin-10	0.333333	1.00334
Q75QN2	C385	Integrator complex subunit 8	0.333333	1.00334
Q96JN2	C420	Coiled-coil domain-containing protein 136	0.333333	1.00334
Q8NCE2	C429	Myotubularin-related protein 14	0.333333	1.00334
Q9NQR4	C44	Omega-amidase NIT2	0.333333	1.00334
P28838	C445	Cytosol aminopeptidase	0.333333	1.00334
O00628	C45	Peroxisomal targeting signal 2 receptor	0.333333	1.00334
Q13162	C51	Peroxiredoxin-4	0.333333	1.00334
P08238	C521	Heat shock protein HSP 90-beta	0.333333	1.00334
O14531	C522	Dihydropyrimidinase-related protein 4	0.333333	1.00334
Q96P70	C545	Importin-9	0.333333	1.00334
Q9UHB9	C562	Signal recognition particle 68 kDa protein	0.333333	1.00334
Q9P2J5	C573	Leucine--tRNA ligase, cytoplasmic	0.333333	1.00334
Q9NYJ8	C608	TGF-beta-activated kinase 1 and MAP3K7-binding protein 2TGF-beta-activated kinase 1 and MAP3K7-binding pro...	0.333333	1.00334
P62241	C71	40S ribosomal protein S8	0.333333	1.00334
P46821	C73	Microtubule-associated protein 1B	0.333333	1.00334
Q5TAX3	C776	Terminal uridylyltransferase 4	0.333333	1.00334
Q92598	C796	Heat shock protein 105 kDa	0.333333	1.00334
H7BZ11	C83	protein	0.333333	1.00334
O60841	C853	Eukaryotic translation initiation factor 5B	0.333333	1.00334
Q86XL3	C864	Ankyrin repeat and LEM domain-containing protein 2	0.333333	1.00334
Q99700	C892	Ataxin-2	0.333333	1.00334
Q01804	C902	OTU domain-containing protein 4	0.333333	1.00334
P30041	C91	Peroxiredoxin-6	0.333333	1.00334
Q9Y5U2	C99	Protein TSSC4	0.333333	1.00334
Q96RG2	C15	PAS domain-containing serine/threonine-protein kinasePAS domain-containing serine/threonine-protein kin...	0.332226	1.00333
Q8N9I9	C272	Probable E3 ubiquitin-protein ligase DTX3	0.332226	1.00333
O43542	C310	DNA repair protein XRCC3	0.332226	1.00333
P35520	C431	Cystathionine beta-synthase	0.332226	1.00333
Q2TAY7	C447	WD40 repeat-containing protein SMU1	0.332226	1.00333
Q9P0K7	C468	Ankycorbin	0.332226	1.00333
P11142	C603	Heat shock cognate 71 kDa protein	0.332226	1.00333
Q13247	C61	Serine/arginine-rich splicing factor 6	0.332226	1.00333
Q6ZRI6	C703	Uncharacterized protein C15orf39	0.332226	1.00333
O00410	C739	Importin-5	0.332226	1.00333
Q9NZT2	C87	Opioid growth factor receptor	0.332226	1.00333
P28340	C873	DNA polymerase delta catalytic subunit	0.332226	1.00333
Q9NRJ4	C938	Tubby-related protein 4	0.332226	1.00333
Q27J81	C1029	Inverted formin-2	0	1
O43734	C105	Adapter protein CIKS	0	1
Q14315	C1066	Filamin-C	0	1
Q9Y4D8	C1084	Probable E3 ubiquitin-protein ligase HECTD4	0	1
Q5TGY3	C1099	AT-hook DNA-binding motif-containing protein 1	0	1
Q13464	C1206	Rho-associated protein kinase 1	0	1
Q01433	C123	AMP deaminase 2	0	1
Q9BUE6	C123	Iron-sulfur cluster assembly 1 homolog, mitochondrialIron-sulfur cluster assembly 1 homolog, mitochondr...	0	1
Q9NQZ6	C124	Zinc finger C4H2 domain-containing protein	0	1
O60343	C1277	TBC1 domain family member 4	0	1
Q6IS14	C129	Eukaryotic translation initiation factor 5A-1-like	0	1
P27708	C1296	CAD protein	0	1
Q8NFG4	C134	Folliculin	0	1
P40925	C137	Malate dehydrogenase, cytoplasmic	0	1
Q15386	C140	Ubiquitin-protein ligase E3C	0	1
P09960	C147	Leukotriene A-4 hydrolase	0	1
P17987	C147	T-complex protein 1 subunit alpha	0	1
Q9H0L4	C150	Cleavage stimulation factor subunit 2 tau variant	0	1
P30153	C154	Serine/threonine-protein phosphatase 2A 65 kDa regulatory subunit A alpha isoformSerine/threonine-protein phosphatase 2A 65 kDa reg...	0	1
P13804	C155	Electron transfer flavoprotein subunit alpha, mitochondrialElectron transfer flavoprotein subunit alpha, mito...	0	1
P40939	C156	Trifunctional enzyme subunit alpha, mitochondrial	0	1
P78345	C159	Ribonuclease P protein subunit p38	0	1
Q8WYP5	C1628	Protein ELYS	0	1
P00338	C163	L-lactate dehydrogenase A chain	0	1
P07195	C164	L-lactate dehydrogenase B chain	0	1
P51580	C165	Thiopurine S-methyltransferase	0	1
P53778	C165	Mitogen-activated protein kinase 12	0	1
P30154	C166	Serine/threonine-protein phosphatase 2A 65 kDa regulatory subunit A beta isoformSerine/threonine-protein phosphatase 2A 65 kDa reg...	0	1
Q9UHQ1	C172	Nuclear prelamin A recognition factor	0	1
Q9BYB4	C175	Guanine nucleotide-binding protein subunit beta-like protein 1Guanine nucleotide-binding protein subunit beta-li...	0	1
Q16555	C179	Dihydropyrimidinase-related protein 2	0	1
P63244	C182	Guanine nucleotide-binding protein subunit beta-2-like 1Guanine nucleotide-binding protein subunit beta-2-...	0	1
Q9Y266	C188	Nuclear migration protein nudC	0	1
O43175	C19	D-3-phosphoglycerate dehydrogenase	0	1
Q96S99	C21	Pleckstrin homology domain-containing family F member 1Pleckstrin homology domain-containing family F mem...	0	1
Q8IWZ3	C213	Ankyrin repeat and KH domain-containing protein 1	0	1
P08559	C218	Pyruvate dehydrogenase E1 component subunit alpha, somatic form, mitochondrialPyruvate dehydrogenase E1 component subunit alpha,...	0	1
Q53GT1	C22	Kelch-like protein 22	0	1
Q13322	C223	Growth factor receptor-bound protein 10	0	1
O75351	C240	Vacuolar protein sorting-associated protein 4B	0	1
P49321	C254	Nuclear autoantigenic sperm protein	0	1
Q6DN90	C260	IQ motif and SEC7 domain-containing protein 1	0	1
Q13045	C264	Protein flightless-1 homolog	0	1
O95671	C274	N-acetylserotonin O-methyltransferase-like protein	0	1
Q9NVX2	C280	Notchless protein homolog 1	0	1
P21281	C289	V-type proton ATPase subunit B, brain isoform	0	1
Q15024	C29	Exosome complex component RRP42	0	1
Q13555	C290	Calcium/calmodulin-dependent protein kinase type II subunit gammaCalcium/calmodulin-dependent protein kinase type I...	0	1
P13489	C30	Ribonuclease inhibitor	0	1
Q8IYS1	C30	Peptidase M20 domain-containing protein 2	0	1
Q9UBT2	C30	SUMO-activating enzyme subunit 2	0	1
Q9H4B0	C301	Probable tRNA threonylcarbamoyladenosine biosynthesis protein OSGEPL1Probable tRNA threonylcarbamoyladenosine biosynthe...	0	1
P13489	C305	Ribonuclease inhibitor	0	1
Q06203	C306	Amidophosphoribosyltransferase	0	1
Q9GZL7	C309	Ribosome biogenesis protein WDR12	0	1
P31751	C311	RAC-beta serine/threonine-protein kinase	0	1
Q8WXI9	C314	Transcriptional repressor p66-beta	0	1
Q9Y5Q8	C32	General transcription factor 3C polypeptide 5	0	1
Q9UBE0	C342	SUMO-activating enzyme subunit 1	0	1
Q5T1V6	C345	Probable ATP-dependent RNA helicase DDX59	0	1
Q96DY7	C347	Mdm2-binding protein	0	1
Q96JB2	C349	Conserved oligomeric Golgi complex subunit 3	0	1
Q96FC9	C350	Probable ATP-dependent RNA helicase DDX11	0	1
P55263	C353	Adenosine kinase	0	1
Q92696	C354	Geranylgeranyl transferase type-2 subunit alpha	0	1
Q99575	C358	Ribonucleases P/MRP protein subunit POP1	0	1
Q15040	C36	Josephin-1	0	1
Q9Y221	C36	60S ribosome subunit biogenesis protein NIP7 homolog60S ribosome subunit biogenesis protein NIP7 homol...	0	1
P10321	C364	HLA class I histocompatibility antigen, Cw-7 alpha chainHLA class I histocompatibility antigen, Cw-7 alpha...	0	1
Q14145	C368	Kelch-like ECH-associated protein 1	0	1
Q8TCU6	C37	Phosphatidylinositol 3,4,5-trisphosphate-dependent Rac exchanger 1 proteinPhosphatidylinositol 3,4,5-trisphosphate-dependent...	0	1
P45985	C379	Dual specificity mitogen-activated protein kinase kinase 4Dual specificity mitogen-activated protein kinase ...	0	1
Q6P2E9	C384	Enhancer of mRNA-decapping protein 4	0	1
Q9UG63	C388	ATP-binding cassette sub-family F member 2	0	1
Q0P651	C393	Uncharacterized protein C4orf29	0	1
Q99707	C406	Methionine synthase	0	1
P26358	C414	DNA (cytosine-5)-methyltransferase 1	0	1
P52429	C415	Diacylglycerol kinase epsilon	0	1
Q6KC79	C419	Nipped-B-like protein	0	1
Q7L2J0	C429	7SK snRNA methylphosphate capping enzyme	0	1
P25205	C446	DNA replication licensing factor MCM3	0	1
A0AVT1	C449	Ubiquitin-like modifier-activating enzyme 6	0	1
Q9HCC0	C453	Methylcrotonoyl-CoA carboxylase beta chain, mitochondrialMethylcrotonoyl-CoA carboxylase beta chain, mitoch...	0	1
O75290	C458	Zinc finger protein 780A	0	1
A0AVT1	C468	Ubiquitin-like modifier-activating enzyme 6	0	1
P18077	C47	60S ribosomal protein L35a	0	1
Q7Z569	C47	BRCA1-associated protein	0	1
Q9BZE2	C472	tRNA pseudouridine(38/39) synthase	0	1
O60231	C486	Putative pre-mRNA-splicing factor ATP-dependent RNA helicase DHX16Putative pre-mRNA-splicing factor ATP-dependent RN...	0	1
Q6N043	C487	Zinc finger protein 280D	0	1
Q15648	C489	Mediator of RNA polymerase II transcription subunit 1Mediator of RNA polymerase II transcription subuni...	0	1
P09884	C497	DNA polymerase alpha catalytic subunit	0	1
Q86T24	C505	Transcriptional regulator Kaiso	0	1
Q02040	C549	A-kinase anchor protein 17A	0	1
P08133	C552	Annexin A6	0	1
Q12788	C555	Transducin beta-like protein 3	0	1
P08133	C558	Annexin A6	0	1
O00410	C560	Importin-5	0	1
P13797	C566	Plastin-3	0	1
O94854	C571	Uncharacterized protein KIAA0754	0	1
Q6Y7W6	C573	PERQ amino acid-rich with GYF domain-containing protein 2PERQ amino acid-rich with GYF domain-containing pr...	0	1
P30520	C58	Adenylosuccinate synthetase isozyme 2	0	1
Q0JRZ9	C595	FCH domain only protein 2	0	1
Q86UK7	C60	Zinc finger protein 598	0	1
Q86UW6	C601	NEDD4-binding protein 2	0	1
Q5VWQ0	C671	Round spermatid basic protein 1	0	1
O43847	C673	Nardilysin	0	1
P51692	C688	Signal transducer and activator of transcription 5BSignal transducer and activator of transcription 5...	0	1
Q9Y4U1	C70	Methylmalonic aciduria and homocystinuria type C proteinMethylmalonic aciduria and homocystinuria type C p...	0	1
P53396	C734	ATP-citrate synthase	0	1
Q5JWF2	C817	Guanine nucleotide-binding protein G(s) subunit alpha isoforms XLasGuanine nucleotide-binding protein G(s) subunit al...	0	1
O75155	C828	Cullin-associated NEDD8-dissociated protein 2	0	1
Q8NCN5	C85	Pyruvate dehydrogenase phosphatase regulatory subunit, mitochondrialPyruvate dehydrogenase phosphatase regulatory subu...	0	1
H7BZ11	C88	protein	0	1
Q8WYQ5	C91	Microprocessor complex subunit DGCR8	0	1
Q01658	C94	Protein Dr1	0	1
Q9BYP7	C949	Serine/threonine-protein kinase WNK3	0	1
O75376	C952	Nuclear receptor corepressor 1	0	1
Q15274	C96	Nicotinate-nucleotide pyrophosphorylase [carboxylating] [REVIEWED] ENSG00000103485;IPI00300086;Q15274;Q53XW7;Q96G22;Q9BSG6Nicotinate-nucleotide pyrophosphorylase [carboxyla...	0	1
Q8N6Q8	C96	Methyltransferase-like protein 25	0	1
Q96MW5	C96	Conserved oligomeric Golgi complex subunit 8	0	1
O75044	C98	SLIT-ROBO Rho GTPase-activating protein 2	0	1
P22314	C1039	Ubiquitin-like modifier-activating enzyme 1	-0.332226	0.996689
Q8NC51	C11	Plasminogen activator inhibitor 1 RNA-binding proteinPlasminogen activator inhibitor 1 RNA-binding prot...	-0.332226	0.996689
O75179	C1622	Ankyrin repeat domain-containing protein 17	-0.332226	0.996689
Q13439	C1771	Golgin subfamily A member 4	-0.332226	0.996689
Q08J23	C271	tRNA (cytosine(34)-C(5))-methyltransferase	-0.332226	0.996689
P47897	C298	Glutamine--tRNA ligase	-0.332226	0.996689
Q9C0C9	C314	Ubiquitin-conjugating enzyme E2 O	-0.332226	0.996689
Q6ZRI6	C483	Uncharacterized protein C15orf39	-0.332226	0.996689
Q9UIS9	C525	Methyl-CpG-binding domain protein 1	-0.332226	0.996689
Q5SYE7	C530	NHS-like protein 1	-0.332226	0.996689
Q9BRX2	C68	Protein pelota homolog	-0.332226	0.996689
Q99622	C73	Protein C10	-0.332226	0.996689
P49454	C1029	Centromere protein F	-0.333333	0.996678
P35520	C109	Cystathionine beta-synthase	-0.333333	0.996678
Q02543	C109	60S ribosomal protein L18a	-0.333333	0.996678
Q5VV42	C109	Threonylcarbamoyladenosine tRNA methylthiotransferaseThreonylcarbamoyladenosine tRNA methylthiotransfer...	-0.333333	0.996678
P61981	C112	14-3-3 protein gamma	-0.333333	0.996678
Q14146	C1132	Unhealthy ribosome biogenesis protein 2 homolog	-0.333333	0.996678
P62280	C116	40S ribosomal protein S11	-0.333333	0.996678
Q9ULX6	C128	A-kinase anchor protein 8-like	-0.333333	0.996678
Q6UVY6	C129	DBH-like monooxygenase protein 1	-0.333333	0.996678
Q6F5E8	C1339	Leucine-rich repeat-containing protein 16C	-0.333333	0.996678
Q9BXW9	C1369	Fanconi anemia group D2 protein	-0.333333	0.996678
Q8TDB4	C139	Protein MGARP	-0.333333	0.996678
Q9P287	C141	BRCA2 and CDKN1A-interacting protein	-0.333333	0.996678
Q9NRP7	C142	Serine/threonine-protein kinase 36	-0.333333	0.996678
P08559	C145	Pyruvate dehydrogenase E1 component subunit alpha, somatic form, mitochondrialPyruvate dehydrogenase E1 component subunit alpha,...	-0.333333	0.996678
Q14149	C15	MORC family CW-type zinc finger protein 3	-0.333333	0.996678
P04406	C152	Glyceraldehyde-3-phosphate dehydrogenase	-0.333333	0.996678
P63244	C153	Guanine nucleotide-binding protein subunit beta-2-like 1Guanine nucleotide-binding protein subunit beta-2-...	-0.333333	0.996678
Q5THK1	C1568	Protein PRR14L	-0.333333	0.996678
P15924	C1589	Desmoplakin	-0.333333	0.996678
Q9P2N6	C161	KAT8 regulatory NSL complex subunit 3	-0.333333	0.996678
Q9Y3C4	C167	TP53RK-binding protein	-0.333333	0.996678
P08107	C17	Heat shock 70 kDa protein 1A/1B	-0.333333	0.996678
Q9H1B7	C17	Interferon regulatory factor 2-binding protein-likeInterferon regulatory factor 2-binding protein-lik...	-0.333333	0.996678
P24941	C177	Cyclin-dependent kinase 2	-0.333333	0.996678
P48739	C187	Phosphatidylinositol transfer protein beta isoform	-0.333333	0.996678
Q7Z5L9	C19	Interferon regulatory factor 2-binding protein 2	-0.333333	0.996678
Q9NQT5	C215	Exosome complex component RRP40	-0.333333	0.996678
Q52LJ0	C216	Protein FAM98B	-0.333333	0.996678
Q96SN8	C255	CDK5 regulatory subunit-associated protein 2	-0.333333	0.996678
O75874	C269	Isocitrate dehydrogenase [NADP] cytoplasmic [REVIEWED] ENSG00000138413;IPI00027223;O75874;Q7Z3V0;Q93090;Q9NTJ9;Q9UKW8Isocitrate dehydrogenase [NADP] cytoplasmic [REVIE...	-0.333333	0.996678
Q96H55	C275	Unconventional myosin-XIX	-0.333333	0.996678
P14854	C30	Cytochrome c oxidase subunit 6B1	-0.333333	0.996678
Q99700	C301	Ataxin-2	-0.333333	0.996678
Q06330	C313	Recombining binding protein suppressor of hairless	-0.333333	0.996678
O75592	C3158	Probable E3 ubiquitin-protein ligase MYCBP2	-0.333333	0.996678
Q9UL15	C327	BAG family molecular chaperone regulator 5	-0.333333	0.996678
Q9NQT4	C33	Exosome complex component RRP46	-0.333333	0.996678
Q9UI30	C33	tRNA methyltransferase 112 homolog	-0.333333	0.996678
Q16543	C336	Hsp90 co-chaperone Cdc37	-0.333333	0.996678
P07900	C374	Heat shock protein HSP 90-alpha	-0.333333	0.996678
Q15935	C391	Zinc finger protein 77	-0.333333	0.996678
P48163	C415	NADP-dependent malic enzyme	-0.333333	0.996678
P28340	C428	DNA polymerase delta catalytic subunit	-0.333333	0.996678
Q9Y5B0	C429	RNA polymerase II subunit A C-terminal domain phosphataseRNA polymerase II subunit A C-terminal domain phos...	-0.333333	0.996678
Q7Z6Z7	C4341	E3 ubiquitin-protein ligase HUWE1	-0.333333	0.996678
Q92908	C46	Transcription factor GATA-6	-0.333333	0.996678
Q99704	C463	Docking protein 1	-0.333333	0.996678
P22314	C481	Ubiquitin-like modifier-activating enzyme 1	-0.333333	0.996678
Q3YEC7	C491	Rab-like protein 6	-0.333333	0.996678
P22626	C50	Heterogeneous nuclear ribonucleoproteins A2/B1	-0.333333	0.996678
Q96D53	C508	Uncharacterized aarF domain-containing protein kinase 4Uncharacterized aarF domain-containing protein kin...	-0.333333	0.996678
Q9ULJ1	C524	Outer dense fiber protein 2-like	-0.333333	0.996678
Q9UPQ9	C600	Trinucleotide repeat-containing gene 6B protein	-0.333333	0.996678
Q3SY69	C608	Mitochondrial 10-formyltetrahydrofolate dehydrogenaseMitochondrial 10-formyltetrahydrofolate dehydrogen...	-0.333333	0.996678
Q8IWF2	C615	FAD-dependent oxidoreductase domain-containing protein 2FAD-dependent oxidoreductase domain-containing pro...	-0.333333	0.996678
P12004	C62	Proliferating cell nuclear antigen	-0.333333	0.996678
Q92973	C620	Transportin-1	-0.333333	0.996678
Q8NCG7	C658	Sn1-specific diacylglycerol lipase beta	-0.333333	0.996678
P85037	C665	Forkhead box protein K1	-0.333333	0.996678
P51965	C67	Ubiquitin-conjugating enzyme E2 E1	-0.333333	0.996678
Q14149	C671	MORC family CW-type zinc finger protein 3	-0.333333	0.996678
Q86W56	C681	Poly(ADP-ribose) glycohydrolase	-0.333333	0.996678
Q9NVT9	C69	Armadillo repeat-containing protein 1	-0.333333	0.996678
Q14149	C694	MORC family CW-type zinc finger protein 3	-0.333333	0.996678
Q9BZL6	C694	Serine/threonine-protein kinase D2	-0.333333	0.996678
P13807	C699	Glycogen [starch] synthase, muscle [REVIEWED] ENSG00000104812;IPI00303868;P13807;Q9BTT9Glycogen [starch] synthase, muscle [REVIEWED] ENSG...	-0.333333	0.996678
O94806	C719	Serine/threonine-protein kinase D3	-0.333333	0.996678
P22102	C733	Trifunctional purine biosynthetic protein adenosine-3Trifunctional purine biosynthetic protein adenosin...	-0.333333	0.996678
P15336	C79	Cyclic AMP-dependent transcription factor ATF-2	-0.333333	0.996678
Q99707	C798	Methionine synthase	-0.333333	0.996678
Q05086	C83	Ubiquitin-protein ligase E3A	-0.333333	0.996678
Q92973	C862	Transportin-1	-0.333333	0.996678
Q8TD19	C890	Serine/threonine-protein kinase Nek9	-0.333333	0.996678
Q8N196	C93	Homeobox protein SIX5	-0.333333	0.996678
Q9UPR3	C109	Protein SMG5	-0.334448	0.996667
O75417	C1237	DNA polymerase theta	-0.334448	0.996667
P98164	C1601	Low-density lipoprotein receptor-related protein 2	-0.334448	0.996667
Q9BQA1	C186	Methylosome protein 50	-0.334448	0.996667
Q9HCK8	C2378	Chromodomain-helicase-DNA-binding protein 8	-0.334448	0.996667
Q7Z6Z7	C3239	E3 ubiquitin-protein ligase HUWE1	-0.334448	0.996667
Q08211	C469	ATP-dependent RNA helicase A	-0.334448	0.996667
P31948	C62	Stress-induced-phosphoprotein 1	-0.334448	0.996667
Q8WVD3	C86	E3 ubiquitin-protein ligase RNF138	-0.334448	0.996667
Q8TEX9	C870	Importin-4	-0.334448	0.996667
P53582	C9	Methionine aminopeptidase 1	-0.334448	0.996667
Q9NUQ3	C101	Gamma-taxilin	-0.664452	0.993399
P27797	C105	Calreticulin	-0.664452	0.993399
Q8IZH2	C1450	5'-3' exoribonuclease 1	-0.664452	0.993399
O43805	C18	Sjoegren syndrome nuclear autoantigen 1	-0.664452	0.993399
Q9Y490	C2196	Talin-1	-0.664452	0.993399
Q9Y4G6	C2197	Talin-2	-0.664452	0.993399
Q86VZ2	C257	WD repeat-containing protein 5B	-0.664452	0.993399
P27987	C288	Inositol-trisphosphate 3-kinase B	-0.664452	0.993399
O14646	C502	Chromodomain-helicase-DNA-binding protein 1	-0.664452	0.993399
Q53H82	C58	Beta-lactamase-like protein 2	-0.664452	0.993399
Q9Y4P1	C74	Cysteine protease ATG4B	-0.664452	0.993399
Q14203	C791	Dynactin subunit 1	-0.664452	0.993399
Q8NB46	C1038	Serine/threonine-protein phosphatase 6 regulatory ankyrin repeat subunit CSerine/threonine-protein phosphatase 6 regulatory ...	-0.666667	0.993377
Q6PI48	C108	Aspartate--tRNA ligase, mitochondrial	-0.666667	0.993377
Q9BTE3	C108	Mini-chromosome maintenance complex-binding proteinMini-chromosome maintenance complex-binding protei...	-0.666667	0.993377
O14981	C109	TATA-binding protein-associated factor 172	-0.666667	0.993377
Q9Y4E6	C1103	WD repeat-containing protein 7	-0.666667	0.993377
Q96KB5	C112	Lymphokine-activated killer T-cell-originated protein kinaseLymphokine-activated killer T-cell-originated prot...	-0.666667	0.993377
Q9BVC4	C121	Target of rapamycin complex subunit LST8	-0.666667	0.993377
Q92688	C123	Acidic leucine-rich nuclear phosphoprotein 32 family member BAcidic leucine-rich nuclear phosphoprotein 32 fami...	-0.666667	0.993377
Q15645	C14	Pachytene checkpoint protein 2 homolog	-0.666667	0.993377
Q09019	C140	Dystrophia myotonica WD repeat-containing protein	-0.666667	0.993377
Q86VQ1	C151	Glucocorticoid-induced transcript 1 protein	-0.666667	0.993377
Q9NSD9	C151	Phenylalanine--tRNA ligase beta subunit	-0.666667	0.993377
Q13572	C156	Inositol-tetrakisphosphate 1-kinase	-0.666667	0.993377
Q9NVJ2	C158	ADP-ribosylation factor-like protein 8B	-0.666667	0.993377
P40938	C164	Replication factor C subunit 3	-0.666667	0.993377
Q86XK2	C177	F-box only protein 11	-0.666667	0.993377
[truncated: 10,721 more rows]
